# Supplementary material
Source: PubMed Central journal article supplement (PMC2440582)
Supplement: NIHMS55000-supplement-WeerapanaSupp.pdf [file NIHMS55000-supplement-WeerapanaSupp.pdf]

**Disparate proteome reactivity profiles of carbon electrophiles: Supplementary Information**

Eranthie Weerapana, Gabriel M. Simon, Benjamin F. Cravatt\*

The Skaggs Institute for Chemical Biology and Department of Chemical Physiology, The Scripps Research Institute, 10550 N. Torrey Pines Road. La Jolla, CA 92037

\*Correspondence should be addressed to B. F. C. (cravatt@scripps.edu)

**Supplementary Information Figure 1:** Gel demonstrating the labeling of a soluble mouse liver proteome (1 mg/ml) using the panel of electrophilic probes (Fig. 1). Fluorescent gel images shown in grayscale after probe labeling for 1 hour, followed by click chemistry with a rhodamine-azide reporter tag.

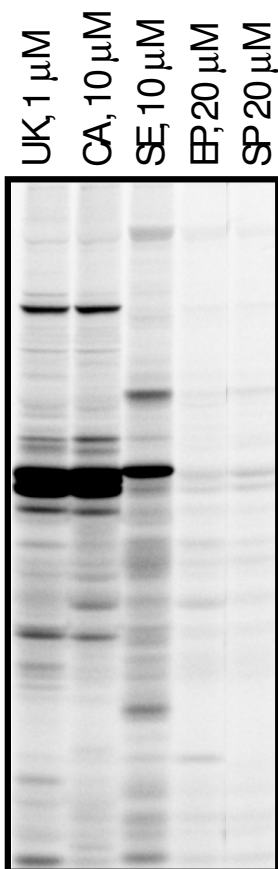

**Supplementary Information Figure 2:** Venn-diagram illustrating the overlap between residues labeled by the CA and UK probes.

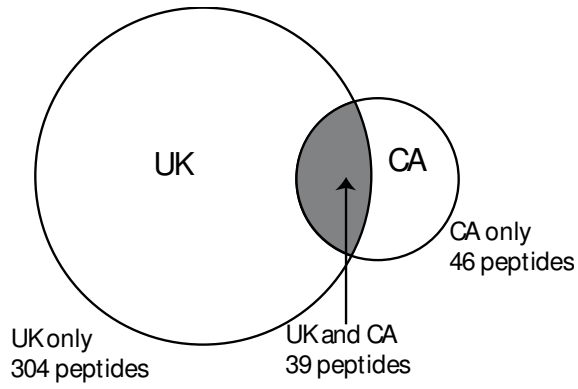

**Supplementary Information, Figure 3:** Nitric oxide and oxidized glutathione treatment of CLICs. Lysates were treated with either 5 mM of the nitric oxide donor, diethylamine nitric oxide, sodium salt (DEANO) or 2 mM of oxidized glutathione (GSSG) for 1 hour, followed by addition of 20  $\mu$ M of the CA probe for 15 minutes. A subsection of the gel is presented in **Fig. 2**; the entire gel is presented here, illustrating the proteome-wide changes that occur in the COS-7 lysates upon treatment with the oxidizing agents.

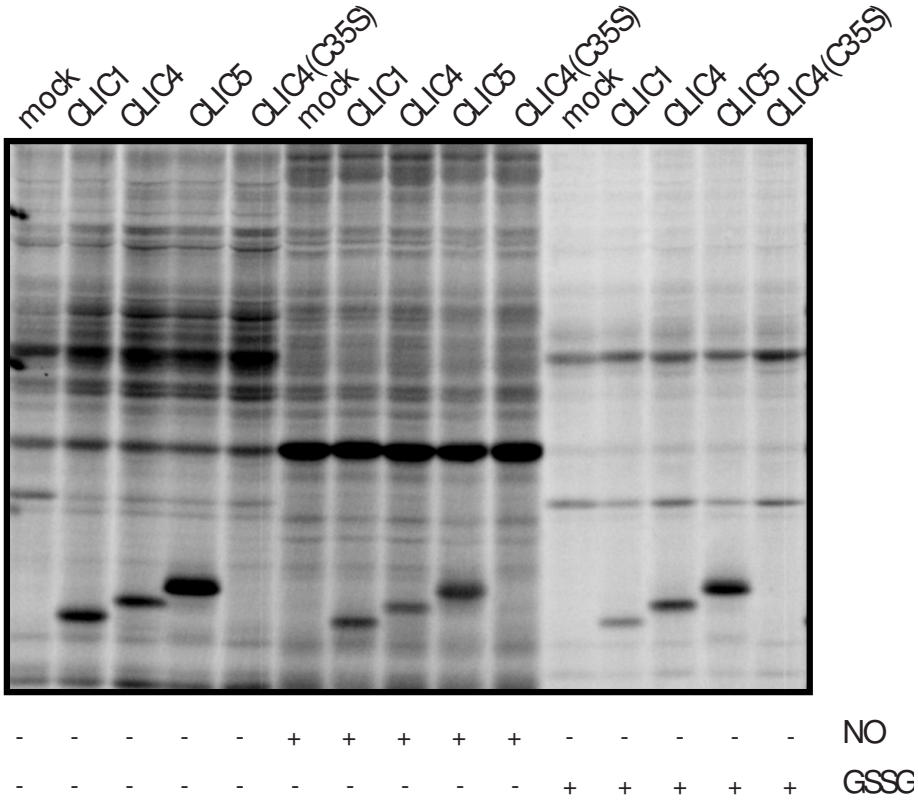

**Supplementary Information Table 1:** Functional residues labeled by the SE, CA and UK probes.

| IPI number  | Description                                                          | Peptide                                 | MA  | SE  | CA  | Site of Labeling | Function                                         |
|-------------|----------------------------------------------------------------------|-----------------------------------------|-----|-----|-----|------------------|--------------------------------------------------|
| IPI00108895 | <b>26S protease regulatory subunit 6B</b>                            | GVLMYGPPGC*GK                           | 10  | -   | -   | C210             | ATP binding domain (potential)                   |
| IPI00109169 | <b>Isocitrate dehydrogenase [NAD] subunit gamma</b>                  | HAC*VPVDFEEVHVS<br>SNADEEDIR            | 22  | -   | -   | C81              | NAD binding domain (potential)                   |
| IPI00113223 | <b>Fatty acid synthase</b>                                           | GPSIALDTAC*SSLL<br>ALQNAVQAIR           | 28  | -   | 75  | C161             | Active site (for beta-ketoacylsynthase activity) |
| IPI00115599 | <b>Corticosteroid 11-beta-dehydrogenase 1</b>                        | MTQPMIAPY*SASK                          | -   | 4   | -   | Y183             | Active site proton acceptor                      |
| IPI00116074 | <b>Aconitate hydratase, mitochondrial precursor</b>                  | VGLIGSC*TNSSYED<br>MGR                  | -   | -   | 8   | C385             | Iron-sulfur cluster                              |
| IPI00116192 | <b>Thioredoxin-dependent peroxide reductase</b>                      | AFQFVETHGEVC*PA<br>NWTPESTIKPSPTA<br>SK | 14  | -   | -   | C230             | Disulfide with active-site cysteine              |
| IPI00116489 | <b>Atrial natriuretic factor precursor</b>                           | IGAQSGLGC*NSFR                          | 6   | -   | -   | C145             | Disulfide bond                                   |
| IPI00118344 | <b>UDP-glucose 6-dehydrogenase</b>                                   | ASVGFGGSC*FQK                           | -   | -   | 18  | C276             | Active site nucleophile                          |
| IPI00118849 | <b>Dual specificity tyrosine-phosphorylation-regulated kinase 1A</b> | KVYNDGYDDDN*YD<br>YIVK                  | -   | 24  | -   | Y145             | Site of phosphorylation                          |
| IPI00119112 | <b>Vacuolar ATP synthase catalytic subunit A</b>                     | VLDALFPCVQGGTT<br>AIPGAFGC*GK           | 28  | -   | -   | C254             | ATP binding domain (potential)                   |
| IPI00119114 | <b>Long-chain specific acyl-CoA dehydrogenase</b>                    | GFYYLMQELPQE*R                          | -   | 26  | -   | E291             | Active site proton acceptor                      |
| IPI00119945 | <b>Nit protein 2</b>                                                 | VGLGIC*YDMR                             | -   | -   | 125 | C153             | Active site nucleophile                          |
| IPI00120076 | <b>Creatine kinase, sarcomeric mitochondrial precursor</b>           | LGYLTC*PSNLGTGL<br>R                    | 73  | -   | 79  | C317             | Active site residue                              |
| IPI00121566 | <b>GMP reductase 1</b>                                               | VGVGPGSVC*TTR                           | 11  | -   | -   | C186             | Active site thioimidate intermediate             |
| IPI00121639 | <b>Beta-ureidopropionase</b>                                         | IAVNIC*YGR                              | -   | -   | 11  | C233             | Active site nucleophile                          |
| IPI00121788 | <b>Peroxiredoxin-1</b>                                               | HGEVC*PAGWKPGS<br>DTIKPDVNK             | 95  | -   | -   | C173             | Disulfide with active-site cysteine              |
| IPI00122549 | <b>Voltage-dependent anion-selective channel protein 1</b>           | WTEYGLTFTE*K                            | -   | 10  | -   | E86              | Hexokinase binding                               |
| IPI00125135 | <b>Ubiquitin-conjugating enzyme E2 D2</b>                            | IYHPNINSNGSIC*LDI<br>LR                 | 29  | -   | -   | C85              | Active site glycyI thioester intermediate        |
| IPI00126208 | <b>Hemoglobin, beta adult major chain</b>                            | GTFASLSELHC*DK                          | 100 | 151 | 332 | C94              | Metal binding/Site of nitrosylation              |
| IPI00128760 | <b>Ubiquitin-conjugating enzyme E2 L3</b>                            | GQVC*LPVISAENWK<br>PATK                 | 21  | -   | -   | C86              | Active site glycyI thioester intermediate        |
| IPI00128873 | <b>Nitrilase 1</b>                                                   | VGLAIC*YDMR                             | -   | -   | 20  | C199             | Active site nucleophile                          |
| IPI00129517 | <b>Peroxiredoxin-5, mitochondrial precursor</b>                      | ALNVEPDGTGLTC*S<br>LAPNILSQL            | 25  | -   | -   | C200             | Redox-active disulfide                           |
|             |                                                                      | GVLFGVPGAFTPGC*<br>SK                   | 18  | -   | -   | C96              | Redox-active disulfide                           |
| IPI00130173 | <b>Ubiquitin-like 1-activating enzyme E1B</b>                        | VLVVGAGGIGC*ELL<br>K                    | 7   | -   | -   | C30              | ATP binding domain                               |

|             |                                                              |                                                                     |                |             |             |                     |                                              |
|-------------|--------------------------------------------------------------|---------------------------------------------------------------------|----------------|-------------|-------------|---------------------|----------------------------------------------|
| IPI00130521 | <b>Ubiquitin-conjugating enzyme E2 A</b>                     | MFHPNVYADGSIC*L<br>DILQNR                                           | 15             | -           | -           | C88                 | Active site glycyl thioester intermediate    |
| IPI00130804 | <b>Delta3,5-delta2,4-dienoyl-CoA isomerase</b>               | EVDMGLAAD*VGTL<br>QR                                                | -              | 755         | -           | D204                | Active site proton donor                     |
| IPI00130950 | <b>Betaine-homocysteine S-methyltransferase</b>              | AGASIVGVNC*HFDP<br>SVSLQTVK                                         | -              | -           | 9           | C217                | Zinc binding                                 |
| IPI00131438 | <b>Phosphoenolpyruvate carboxykinase, cytosolic</b>          | YLAAAFPSAC*GK                                                       | 11             | -           | 22          | C288                | GTP binding                                  |
| IPI00132653 | <b>Succinyl-CoA:3-ketoacid-coenzyme A transferase 1</b>      | DIPNGATLLVGGFGL<br>C*GIPENLIGALLK                                   | 38             | -           | 23          | C67                 | Coenzyme A binding (potential)               |
| IPI00135977 | <b>Chloride intracellular channel protein 4</b>              | AGSDGESIGNC*PFS<br>QR                                               | -              | -           | 74          | C35                 | Site of nitrosylation                        |
| IPI00137533 | <b>6-phosphofructo-2-kinase/fructose-2,6-biphosphatase 2</b> | VFFVESVC*DDPDVI<br>AANILEVK                                         | 19             | -           | -           | C161                | Active site residue                          |
| IPI00153317 | <b>10-formyltetrahydrofolate dehydrogenase</b>               | AVQMGMSVFFNKG<br>ENC*IAAGR                                          | 54             | -           | 340         | C707                | Active site residue                          |
| IPI00221400 | <b>Alcohol dehydrogenase 1</b>                               | IDGASPLDKVCLIGC*<br>GFSTGYGSAVK<br>VIPLFSPQC*GECR<br>VIPLFSPQC*GECR | 13<br>18<br>22 | -<br>-<br>- | -<br>-<br>- | C175<br>C98<br>C101 | Zinc binding<br>Zinc binding<br>Zinc binding |
| IPI00226993 | <b>Thioredoxin</b>                                           | LVVVDFSATWCGPC<br>*K                                                | 6              | -           | -           | C35                 | Active site nucleophile                      |
| IPI00229510 | <b>L-lactate dehydrogenase B chain</b>                       | ITVVGVGQVGMAC*A<br>ISILGK                                           | 45             | -           | -           | C36                 | NAD binding domain                           |
| IPI00266614 | <b>Ribosylidihyronicotinamide dehydrogenase</b>              | VLAPQISFGLD*VSSE<br>EER                                             | -              | 20          | -           | D194                | FAD binding domain                           |
| IPI00273164 | <b>Succinate semialdehyde dehydrogenase</b>                  | NAGQTC*VCSNR                                                        | -              | -           | 19          | C328                | Active site nucleophile                      |
| IPI00273646 | <b>Glyceraldehyde-3-phosphate dehydrogenase</b>              | IVSNASC*TTNCLAPL<br>AK                                              | 34             | -           | 37          | C150                | Active site nucleophile                      |
| IPI00314510 | <b>Aspartoacylase-2</b>                                      | LFSGEDVLYEGDSIV<br>YPVFINE*AAYYEK                                   | -              | 6           | -           | E284                | Active site residue (potential)              |
| IPI00321375 | <b>Biotinidase</b>                                           | FGVFTC*FDILFFDPA<br>VR                                              | -              | -           | 12          | C222                | Active site nucleophile                      |
| IPI00461964 | <b>Aldehyde dehydrogenase family 6, subfamily A1</b>         | C*MALSTAILVGEAK                                                     | -              | 24          | 382         | C317                | Active site nucleophile                      |
| IPI00622235 | <b>Transitional endoplasmic reticulum ATPase</b>             | GVLFGPPGC*GK                                                        | 33             | -           | -           | C522                | ATP binding domain                           |

**Supplementary Information Table 2:** Proteins identified from mouse proteomes treated with the SE probe. Mouse proteomes (soluble proteomes of heart, kidney and liver and membrane proteome of liver) were treated with the SE probe (50  $\mu$ M, 2 hrs) in duplicate. Proteins identified with  $\geq 2$  spectral counts in  $\geq 2$  samples are included. \* Indicates predicted sites of labeling; Average Xcorr values with associated standard deviation is provided for each assigned labeling site.

| PEPTIDE                                                                                                                                                                  | HEART 1 | HEART 2 | KIDNEY 1 | KIDNEY 2 | LIVER 1 | LIVER 2 | LIVER MEM 1 | LIVER MEM 2 | XCORR (average) | STD. DEV. |
|--------------------------------------------------------------------------------------------------------------------------------------------------------------------------|---------|---------|----------|----------|---------|---------|-------------|-------------|-----------------|-----------|
| <b>IP100110658 13 days embryo liver cDNA, RIKEN full-length enriched library, clone:2510040B16 product:hemoglobin, beta adult major chain, full insert sequence</b>      |         |         |          |          |         |         |             |             |                 |           |
| IGGH*GAEYGAEALER                                                                                                                                                         | 0       | 25      | 0        | 18       | 27      | 2       | 2           | 0           | 3.368831        | 0.343294  |
| IGGHGAE*YGAEALER                                                                                                                                                         | 1       | 11      | 0        | 13       | 23      | 1       | 2           | 0           | 3.629864        | 0.809313  |
| IGGHGAEY*GAEALER                                                                                                                                                         | 47      | 5       | 0        | 18       | 33      | 2       | 4           | 0           | 3.757476        | 0.686705  |
| IGGHGAEYGAE*ALER                                                                                                                                                         | 68      | 4       | 0        | 13       | 12      | 9       | 2           | 0           | 4.314721        | 0.911614  |
| IGGHGAEYGAEALR                                                                                                                                                           | 4       | 1       | 1        | 4        | 0       | 0       | 0           | 0           | 3.845813        | 0.949606  |
| <b>IP100110850 Actin, cytoplasmic 1</b>                                                                                                                                  |         |         |          |          |         |         |             |             |                 |           |
| VAPEEH*PVLTEAPLNPK                                                                                                                                                       | 0       | 0       | 0        | 0        | 0       | 0       | 2           | 3           | 3.495533        | 0.536992  |
| <b>IP100111218 Aldehyde dehydrogenase, mitochondrial precursor</b>                                                                                                       |         |         |          |          |         |         |             |             |                 |           |
| ELGEYGLQAYTE*VK                                                                                                                                                          | 0       | 0       | 0        | 0        | 0       | 0       | 3           | 6           | 3.312708        | 0.64171   |
| <b>IP100111908 Carbamoyl-phosphate synthase [ammonia], mitochondrial precursor</b>                                                                                       |         |         |          |          |         |         |             |             |                 |           |
| QADAVYFLPITPQFVT*EVIK                                                                                                                                                    | 0       | 0       | 0        | 0        | 0       | 0       | 11          | 2           | 3.797252        | 0.6031    |
| QADAVYFLPITPQFVTE*VIK                                                                                                                                                    | 0       | 0       | 0        | 0        | 0       | 0       | 13          | 2           | 3.880315        | 0.494176  |
| S*VGEVMAIGR                                                                                                                                                              | 0       | 0       | 0        | 0        | 0       | 0       | 4           | 2           | 2.797413        | 0.669073  |
| SVGE*VMAIGR                                                                                                                                                              | 0       | 0       | 0        | 0        | 0       | 0       | 5           | 6           | 2.934308        | 0.56647   |
| TAHIVLE*DGTK                                                                                                                                                             | 0       | 0       | 0        | 4        | 0       | 0       | 3           | 2           | 3.465833        | 0.57601   |
| TAHIVLE*GTK                                                                                                                                                              | 0       | 0       | 0        | 4        | 0       | 0       | 3           | 2           | 3.064033        | 0.68389   |
| <b>IP100115599 Corticosteroid 11-beta-dehydrogenase isozyme 1</b>                                                                                                        |         |         |          |          |         |         |             |             |                 |           |
| MTOPMIAPY*SASK                                                                                                                                                           | 0       | 0       | 0        | 0        | 0       | 0       | 2           | 2           | 2.808875        | 0.671538  |
| <b>IP100116705 Fatty acid-binding protein, adipocyte</b>                                                                                                                 |         |         |          |          |         |         |             |             |                 |           |
| LVSENF*DYMK                                                                                                                                                              | 2       | 0       | 0        | 0        | 0       | 4       | 0           | 0           | 2.732238        | 0.547574  |
| <b>IP100118849 Dual specificity tyrosine-phosphorylation-regulated kinase 1A</b>                                                                                         |         |         |          |          |         |         |             |             |                 |           |
| KVYNDGYDDNY*DIYIK                                                                                                                                                        | 9       | 2       | 0        | 0        | 0       | 3       | 2           | 8           | 2.865128        | 1.100115  |
| <b>IP100119114 Long-chain specific acyl-CoA dehydrogenase, mitochondrial precursor</b>                                                                                   |         |         |          |          |         |         |             |             |                 |           |
| GFYLMQELPQE*R                                                                                                                                                            | 9       | 10      | 0        | 0        | 3       | 4       | 0           | 0           | 3.525507        | 0.768354  |
| <b>IP100120451 Fatty acid-binding protein, liver</b>                                                                                                                     |         |         |          |          |         |         |             |             |                 |           |
| AIGLPE*DLIQ                                                                                                                                                              | 0       | 0       | 7        | 4        | 0       | 0       | 0           | 0           | 2.779891        | 0.629696  |
| AIGLPE*LIQ                                                                                                                                                               | 0       | 0       | 5        | 5        | 0       | 0       | 0           | 0           | 3.02239         | 0.623804  |
| NEFTLGECC*ELETMTGEK                                                                                                                                                      | 0       | 0       | 2        | 2        | 0       | 0       | 0           | 0           | 2.860975        | 0.429258  |
| <b>IP100121209 Apolipoprotein A-I precursor</b>                                                                                                                          |         |         |          |          |         |         |             |             |                 |           |
| SNPTLNEYH*TR                                                                                                                                                             | 0       | 21      | 0        | 0        | 0       | 0       | 4           | 3           | 2.939579        | 0.36406   |
| VAPLGAE*LQESAR                                                                                                                                                           | 6       | 0       | 2        | 1        | 4       | 4       | 0           | 1           | 3.00656         | 0.884539  |
| WKED*VELYR                                                                                                                                                               | 32      | 5       | 0        | 6        | 1       | 1       | 0           | 0           | 2.901823        | 0.912461  |
| <b>IP100122139 3-ketoacyl-CoA thiolase B, peroxisomal precursor</b>                                                                                                      |         |         |          |          |         |         |             |             |                 |           |
| DTTPDE*LLSAVLTAVLQDVK                                                                                                                                                    | 0       | 0       | 0        | 0        | 0       | 0       | 6           | 8           | 4.2736          | 0.601912  |
| DTTPDELLS*AVLTAVLQDVK                                                                                                                                                    | 0       | 0       | 0        | 0        | 0       | 0       | 4           | 4           | 4.10005         | 0.408725  |
| <b>IP100122549 Isoform PLVDAC1 of Voltage-dependent anion-selective channel protein 1</b>                                                                                |         |         |          |          |         |         |             |             |                 |           |
| WTEYGLTFT*EK                                                                                                                                                             | 0       | 0       | 0        | 0        | 0       | 0       | 2           | 7           | 2.882807        | 0.671464  |
| WTEYGLTFT*EK                                                                                                                                                             | 0       | 0       | 0        | 0        | 0       | 0       | 3           | 7           | 3.15006         | 0.511877  |
| <b>IP100123176 PREDICTED: similar to Glyceraldehyde-3-phosphate dehydrogenase</b>                                                                                        |         |         |          |          |         |         |             |             |                 |           |
| LISWYDNEY*GYSNR                                                                                                                                                          | 7       | 0       | 0        | 0        | 0       | 2       | 0           | 0           | 2.832411        | 0.846916  |
| <b>IP100125521 40S ribosomal protein S5</b>                                                                                                                              |         |         |          |          |         |         |             |             |                 |           |
| KAQC*PIVER                                                                                                                                                               | 0       | 0       | 0        | 0        | 0       | 0       | 2           | 5           | 2.65176         | 0.588363  |
| <b>IP100126208 11 days embryo whole body cDNA, RIKEN full-length enriched library, clone:2700082N11 product:hemoglobin, beta adult major chain, full insert sequence</b> |         |         |          |          |         |         |             |             |                 |           |
| AAVSLWVK*VNADEVGGEALGR                                                                                                                                                   | 7       | 6       | 0        | 4        | 20      | 8       | 0           | 0           | 4.141633        | 0.576466  |
| AAVSLWVKVNADEV*GGEALGR                                                                                                                                                   | 19      | 1       | 0        | 0        | 20      | 22      | 0           | 0           | 3.92133         | 0.633392  |
| AAVSLWVKVNADEV*GGEALGR                                                                                                                                                   | 6       | 0       | 0        | 0        | 5       | 16      | 0           | 0           | 4.208527        | 0.746794  |
| AAVSLWVKVNADEVGGE*ALGR                                                                                                                                                   | 17      | 0       | 0        | 0        | 15      | 16      | 0           | 0           | 5.00805         | 1.128128  |
| GTFASLSELHC*DK                                                                                                                                                           | 44      | 32      | 3        | 22       | 31      | 16      | 1           | 2           | 2.920061        | 0.810369  |
| VITAFNDGLNH*LDSLK                                                                                                                                                        | 0       | 2       | 0        | 1        | 1       | 2       | 0           | 0           | 3.4552          | 0.337369  |
| VITAFNDGLNHLDSLK*GTFASLSELHC*DK                                                                                                                                          | 0       | 4       | 0        | 0        | 6       | 0       | 0           | 0           | 4.775125        | 1.097092  |
| VNAD*EVGGEALGR                                                                                                                                                           | 64      | 9       | 32       | 0        | 50      | 22      | 1           | 1           | 3.298917        | 0.746462  |
| VNAD*VGGGEALGR                                                                                                                                                           | 72      | 7       | 28       | 20       | 49      | 22      | 2           | 1           | 3.357731        | 0.794436  |
| VNADEVGGE*ALGR                                                                                                                                                           | 68      | 15      | 16       | 15       | 41      | 15      | 1           | 9           | 3.620669        | 0.720599  |
| Y*FDSFGDLSASAIMGNAK                                                                                                                                                      | 40      | 22      | 4        | 0        | 5       | 31      | 0           | 0           | 3.986186        | 0.758574  |
| YFD*SFGLDLSASAIMGNAK                                                                                                                                                     | 19      | 12      | 3        | 0        | 0       | 11      | 0           | 0           | 4.113255        | 0.603852  |
| YFDS*FGDLSASAIMGNAK                                                                                                                                                      | 28      | 21      | 3        | 0        | 6       | 20      | 0           | 0           | 4.05001         | 0.602023  |
| YFDSFGD*LSSASAIMGNAK                                                                                                                                                     | 19      | 14      | 1        | 0        | 14      | 22      | 0           | 0           | 4.291167        | 0.904365  |
| <b>IP100130804 Delta3,5-delta2,4-dienoyl-CoA isomerase, mitochondrial precursor</b>                                                                                      |         |         |          |          |         |         |             |             |                 |           |
| EVDMLAAD*VGLTQR                                                                                                                                                          | 252     | 74      | 200      | 42       | 50      | 42      | 45          | 50          | 3.933302        | 0.641378  |
| EVDMLAAD*VGLTQR*LPK                                                                                                                                                      | 0       | 0       | 0        | 0        | 8       | 8       | 0           | 0           | 3.112838        | 0.638987  |
| EVDMLAAD*VGLTQR                                                                                                                                                          | 3       | 1       | 2        | 1        | 0       | 0       | 0           | 0           | 3.111558        | 0.2137    |
| <b>IP100132347 Adult male cerebellum cDNA, RIKEN full-length enriched library, clone:1500015113 product:UBIQUINOL-CYTOCHROME C REDUCTASE BINDING PROTEIN homolog</b>     |         |         |          |          |         |         |             |             |                 |           |
| DTLHE*TEDVK                                                                                                                                                              | 0       | 0       | 0        | 0        | 0       | 0       | 3           | 3           | 2.9657          | 0.656413  |
| <b>IP100133034 Histidine triad nucleotide-binding protein 2</b>                                                                                                          |         |         |          |          |         |         |             |             |                 |           |
| IS*QAEEDDQQLGHLLLVAK                                                                                                                                                     | 0       | 0       | 0        | 0        | 5       | 0       | 4           | 2           | 3.961505        | 0.465516  |
| ISQAE*DDQQLGHLLLVAK                                                                                                                                                      | 0       | 0       | 0        | 0        | 4       | 2       | 3           | 4           | 4.345031        | 0.858929  |
| ISQAEEDD*QQLGHLLLVAK                                                                                                                                                     | 0       | 0       | 0        | 0        | 3       | 1       | 6           | 5           | 4.307644        | 0.824737  |
| <b>IP100133456 Regucalcin</b>                                                                                                                                            |         |         |          |          |         |         |             |             |                 |           |
| VAVD*APVSSVALR                                                                                                                                                           | 0       | 0       | 11       | 6        | 0       | 0       | 0           | 0           | 3.325346        | 0.419269  |
| <b>IP100134746 Argininosuccinate synthase</b>                                                                                                                            |         |         |          |          |         |         |             |             |                 |           |
| EFVEEFWPAVQSSALY*EDR                                                                                                                                                     | 0       | 0       | 0        | 0        | 7       | 4       | 0           | 0           | 3.89298         | 0.432658  |
| EFVEEFWPAVQSSALY*DR                                                                                                                                                      | 0       | 0       | 0        | 0        | 3       | 3       | 0           | 0           | 3.793133        | 0.452609  |
| EFVEEFWPAVQSSALYED*R                                                                                                                                                     | 0       | 0       | 0        | 0        | 4       | 3       | 0           | 0           | 3.906375        | 0.420184  |
| <b>IP100134961 Medium-chain specific acyl-CoA dehydrogenase, mitochondrial precursor</b>                                                                                 |         |         |          |          |         |         |             |             |                 |           |
| AFAGDIANQLAT*DAVQIFGGYGFNT*EYPVEK                                                                                                                                        | 0       | 3       | 0        | 0        | 7       | 0       | 1           | 0           | 4.456584        | 0.892763  |
| AFAGDIANQLAT*DAVQIFGGYGFNT*EYPVEK                                                                                                                                        | 0       | 2       | 0        | 0        | 3       | 0       | 0           | 1           | 5.338894        | 1.588239  |
| IYQIY*EGTAQIQIR                                                                                                                                                          | 5       | 0       | 0        | 0        | 3       | 2       | 0           | 0           | 3.169786        | 0.730981  |
| IYQIY*GTAQIQIR                                                                                                                                                           | 6       | 0       | 0        | 0        | 4       | 3       | 0           | 0           | 3.416525        | 0.653121  |





**Supplementary Information Table 3:** Proteins identified from mouse proteomes treated with the CA probe. Mouse proteomes (soluble proteomes of heart, kidney and liver and membrane proteome of liver) were treated with the CA probe (50  $\mu$ M, 2 hrs) in duplicate. Proteins identified with  $\geq 2$  spectral counts in  $\geq 2$  samples are included. \* Indicates predicted sites of labeling; Average Xcorr values with associated standard deviation is provided for each assigned labeling site.

| PEPTIDE                                                                                                                                                                             | HEART 1 | HEART 2 | KIDNEY 1 | KIDNEY 2 | LIVER 1 | LIVER 2 | LIVER MEM 1 | LIVER MEM 2 | XCORR (average) | STD. DEV. |
|-------------------------------------------------------------------------------------------------------------------------------------------------------------------------------------|---------|---------|----------|----------|---------|---------|-------------|-------------|-----------------|-----------|
| IP100108939 glycerinaldehyde-3-phosphate dehydrogenase, spermatogenic<br>VPTPNVSVVDLTC*R                                                                                            | 14      | 11      | 10       | 24       | 0       | 0       | 0           | 0           | 4.130756        | 0.802102  |
| IP100109061 ES cells cDNA, RIKEN full-length enriched library, clone:2410129E14 product:tubulin beta-4 chain homolog<br>LTTPTYGDLNHLVSATMSGVITTC*LR                                 | 0       | 0       | 5        | 11       | 0       | 0       | 0           | 0           | 4.322249        | 0.829284  |
| IP100110042 Selenium-binding protein 1<br>C*GPGYSTPLEAMK<br>GGSVQVLEDOELTC*QPEPLVVK                                                                                                 | 0       | 0       | 1        | 2        | 2       | 0       | 0           | 0           | 2.843367        | 0.81476   |
| IP100110753 Tubulin alpha-1 chain<br>AVC*MLSNNTTAAIEAWAR<br>TIQFVWC*PTGFK                                                                                                           | 2       | 0       | 1        | 3        | 0       | 0       | 0           | 0           | 3.751378        | 0.578757  |
| IP100111908 Carbamoyl-phosphate synthase [ammonia], mitochondrial precursor<br>TSAC*FEPSLDYMYTK<br>VVAVDC*GIK                                                                       | 0       | 0       | 0        | 0        | 2       | 1       | 0           | 2           | 3.2267          | 0.764348  |
| IP100113223 Fatty acid synthase<br>GPSIALDTAC*SSLLALQNAQAIR                                                                                                                         | 2       | 0       | 17       | 21       | 10      | 21      | 3           | 1           | 4.833118        | 1.299959  |
| IP100114710 Activated spleen cDNA, RIKEN full-length enriched library, clone:F830201B12 product:pyruvate carboxylase, full insert sequence<br>FLYEC*PWR                             | 0       | 0       | 9        | 15       | 8       | 2       | 3           | 1           | 2.740195        | 1.180427  |
| IP100116074 Aconitate hydratase, mitochondrial precursor<br>VGLIGSC*TNSSYEDMGR                                                                                                      | 0       | 2       | 4        | 2        | 0       | 0       | 0           | 0           | 4.053017        | 0.717479  |
| IP100116591 Short-chain specific acyl-CoA dehydrogenase, mitochondrial precursor<br>IGIASQALGIAQASLDC*AVK                                                                           | 0       | 3       | 3        | 1        | 0       | 0       | 0           | 0           | 4.3436          | 1.075734  |
| IP100117348 Tubulin alpha-2 chain<br>AVC*MLSNNTTAAIEAWAR<br>SIQFVWC*PTGFK                                                                                                           | 2       | 0       | 1        | 3        | 0       | 0       | 0           | 0           | 3.751378        | 0.578757  |
| IP100118153 Cysteine and glycine-rich protein 3<br>GIGFGGAGC*LSTDTGEHLGLQFQQSPK                                                                                                     | 3       | 2       | 0        | 0        | 0       | 0       | 0           | 0           | 3.941208        | 0.669989  |
| IP100118344 UDP-glucose 6-dehydrogenase<br>ASVGFGGSC*FOK                                                                                                                            | 0       | 0       | 4        | 9        | 2       | 2       | 0           | 1           | 3.194799        | 0.879093  |
| IP100119112 Vacuolar ATP synthase catalytic subunit A, ubiquitous isoform<br>YSNSDVIIYVGC*GER                                                                                       | 0       | 0       | 18       | 53       | 0       | 0       | 0           | 0           | 3.543914        | 0.637915  |
| IP100119622 Cysteine sulfenic acid decarboxylase<br>FYDVALDTGDKVQC*GR                                                                                                               | 0       | 0       | 0        | 0        | 4       | 3       | 0           | 0           | 4.749875        | 1.024211  |
| IP100119945 Nit protein 2<br>VGLGIC*YDMR                                                                                                                                            | 8       | 0       | 12       | 47       | 39      | 11      | 7           | 1           | 2.773447        | 1.129454  |
| IP100120076 Creatine kinase, sarcomeric mitochondrial precursor<br>LGYLTC*PSNLGTGLR<br>LGYLTC*PSNLGTGLR<br>LGYLTC*PSNLGTGLR                                                         | 3       | 2       | 0        | 0        | 0       | 0       | 0           | 0           | 3.5252          | 0.415846  |
| IP100121639 Beta-ureidopropionase<br>IAVNIC*YGR                                                                                                                                     | 0       | 0       | 0        | 0        | 8       | 3       | 0           | 0           | 2.723908        | 0.740529  |
| IP100126208 11 days embryo whole body cDNA, RIKEN full-length enriched library, clone:2700082N11 product:hemoglobin, beta adult major chain, full insert sequence<br>GTFASLSELHC*DK | 87      | 73      | 28       | 80       | 47      | 12      | 4           | 1           | 3.244796        | 0.909914  |
| IP100126248 Adult male testis cDNA, RIKEN full-length enriched library, clone:4922505F07 product:ATP citrate lyase, full insert sequence<br>YIC*TTSAIQNR                            | 0       | 0       | 2        | 0        | 4       | 2       | 0           | 0           | 3.051667        | 0.755569  |
| IP100126680 Adult male kidney cDNA, RIKEN full-length enriched library, clone:0610009G07 product:glutathione S-transferase, theta 2, full insert sequence<br>GQHMFSEFQVQVNC*LNK     | 0       | 0       | 0        | 57       | 15      | 8       | 0           | 0           | 4.048783        | 0.769788  |
| IP100126940 Isoform Long of Adenosine kinase<br>TGC*TFPEKPDFH                                                                                                                       | 0       | 0       | 0        | 0        | 3       | 3       | 0           | 0           | 3.255283        | 0.560802  |
| IP100127206 Fructose-bisphosphate aldolase B<br>TVPAAVPGIC*FLSGGMSEEDATLNLNAINR                                                                                                     | 0       | 0       | 4        | 17       | 6       | 4       | 0           | 0           | 4.106127        | 0.741567  |
| IP100128376 Aldo-keto reductase family 1, member C14<br>SKDILVSYC*TLGSSR                                                                                                            | 0       | 0       | 0        | 1        | 20      | 2       | 0           | 0           | 4.44376         | 0.742406  |
| IP100128873 Nitrilase 1<br>VGLAIC*YDMR                                                                                                                                              | 0       | 0       | 3        | 14       | 3       | 0       | 0           | 0           | 2.7858          | 0.881408  |
| IP100128904 Poly(rC)-binding protein 1<br>LVVPATQC*GSLIGK                                                                                                                           | 0       | 0       | 0        | 3        | 3       | 0       | 0           | 0           | 2.836967        | 0.817981  |
| IP100129011 Formimidoyltransferase-cyclodeaminase<br>AC*ALQEGLR                                                                                                                     | 0       | 0       | 0        | 0        | 6       | 2       | 0           | 0           | 2.652775        | 0.733955  |
| IP100130280 ATP synthase subunit alpha, mitochondrial precursor<br>YTIVVSATASDAAPLQYLAPYSGC*SMGEYF                                                                                  | 4       | 2       | 0        | 3        | 0       | 0       | 7           | 1           | 4.981455        | 1.395666  |
| IP100130950 Betaine-homocysteine S-methyltransferase<br>AGASIVGNC*HFDPVSVLQTVK<br>QVADEGDALVAGGVSQTPSYLSC*K<br>VNEAAC*DIAR                                                          | 0       | 0       | 0        | 0        | 5       | 4       | 0           | 0           | 4.146553        | 0.68392   |
| IP100131438 Phosphoenolpyruvate carboxykinase, cytosolic<br>YLAAAFPSAC*GK                                                                                                           | 0       | 0       | 7        | 6        | 6       | 3       | 0           | 0           | 3.480611        | 0.771934  |
| IP100131695 Serum albumin precursor<br>C*SYDEHAK                                                                                                                                    | 1       | 3       | 2        | 6        | 7       | 3       | 0           | 0           | 2.670769        | 1.107526  |
| IP100132653 Succinyl-CoA:3-ketoacid-coenzyme A transferase 1, mitochondrial precursor<br>DIPNGATLLVGGFGLC*GIPENLIGALLK                                                              | 8       | 7       | 0        | 8        | 0       | 0       | 0           | 0           | 3.876715        | 0.674411  |
| IP100132950 40S ribosomal protein S21<br>TYGIC*GAIR                                                                                                                                 | 0       | 0       | 1        | 0        | 0       | 0       | 5           | 1           | 2.704907        | 0.89791   |
| IP100133903 Stress-70 protein, mitochondrial precursor<br>C*ELSSVQTDINLPLYLTMDASGPK                                                                                                 | 1       | 0       | 0        | 7        | 0       | 0       | 4           | 1           | 5.135486        | 1.351728  |
| IP100133920 SEC13-related protein<br>FASGGC*DNLIK                                                                                                                                   | 0       | 0       | 2        | 4        | 5       | 0       | 0           | 0           | 3.003452        | 0.752126  |
| IP100134599 40S ribosomal protein S3<br>GLC*AIQAESLR                                                                                                                                | 3       | 1       | 8        | 16       | 11      | 3       | 15          | 2           | 3.595706        | 0.835958  |

| PEPTIDE                                                                                                                                                                               | HEART 1 | HEART 2 | KIDNEY 1 | KIDNEY 2 | LIVER 1 | LIVER 2 | LIVER MEM 1 | LIVER MEM 2 | XCORR (average) | STD. DEV. |
|---------------------------------------------------------------------------------------------------------------------------------------------------------------------------------------|---------|---------|----------|----------|---------|---------|-------------|-------------|-----------------|-----------|
| IP100134746 Argininosuccinate synthase<br>FELTC*YSLAPQIK                                                                                                                              | 0       | 0       | 9        | 17       | 7       | 11      | 1           | 0           | 3.452515        | 0.78576   |
| IP100135231 0 day neonate lung cDNA, RIKEN full-length enriched library, clone:E030024J03 product:isocitrate dehydrogenase 1 (NADP+), soluble, full insert sequence<br>SEGGFIWAC*K    | 0       | 0       | 4        | 4        | 2       | 0       | 0           | 0           | 2.761675        | 0.906782  |
| IP100135977 Chloride intracellular channel protein 4<br>AGSDGESIGNC*PFSQR                                                                                                             | 14      | 9       | 4        | 28       | 10      | 4       | 3           | 2           | 3.749914        | 0.767956  |
| IP100153317 10-formyltetrahydrofolate dehydrogenase<br>AVQMGMSVFFNKGENC*IAAGR                                                                                                         | 0       | 0       | 10       | 131      | 12      | 136     | 49          | 2           | 4.411197        | 0.997113  |
| IP100153463 Dehydrogenase/reductase SDR family member 11 precursor<br>NDDGHINNSMC*GHR                                                                                                 | 10      | 1       | 0        | 10       | 9       | 7       | 0           | 0           | 4.64349         | 1.135088  |
| IP100172221 Isoform 2 of Dynamin-1-like protein<br>IC*YIFHETFG                                                                                                                        | 2       | 0       | 0        | 0        | 5       | 0       | 0           | 0           | 2.707495        | 0.708201  |
| IP100221400 Alcohol dehydrogenase 1<br>MVATGVC*R                                                                                                                                      | 0       | 0       | 1        | 0        | 11      | 2       | 0           | 0           | 2.734045        | 0.885805  |
| IP100221636 Adult male aorta and vein cDNA, RIKEN full-length enriched library, clone:A530080C09 product:weakly similar to ALCOHOL SULFOTRANSFERASE<br>MISGSC*LSNIEK                  | 0       | 0       | 0        | 0        | 5       | 2       | 0           | 0           | 3.811675        | 0.518291  |
| IP100226993 Thioredoxin<br>C*MPTFQFYK                                                                                                                                                 | 0       | 0       | 0        | 2        | 6       | 2       | 0           | 0           | 2.623161        | 1.011675  |
| IP100229510 L-lactate dehydrogenase B chain<br>GMYGIENEVFLSPLC*ILNAR<br>VIGSGC*NLSAR                                                                                                  | 0       | 1       | 3        | 12       | 0       | 0       | 0           | 0           | 4.473531        | 0.74263   |
|                                                                                                                                                                                       | 0       | 11      | 12       | 20       | 0       | 0       | 0           | 0           | 3.30604         | 0.654737  |
| IP100230034 D-dopachrome decarboxylase<br>PFVE*LETNLPASR                                                                                                                              | 1       | 0       | 7        | 8        | 16      | 14      | 0           | 0           | 3.209277        | 0.29981   |
| IP100230212 Glutathione S-transferase Mu 1<br>C*LDAFPNLR                                                                                                                              | 0       | 0       | 0        | 0        | 6       | 3       | 0           | 0           | 2.663908        | 0.809711  |
| IP100230706 Phosphoglycerate mutase 2<br>FC*GWFDAELSEK                                                                                                                                | 21      | 18      | 0        | 0        | 0       | 0       | 0           | 0           | 3.041141        | 0.659126  |
| IP100230760 Myoglobin<br>HGC*TVLTALGTILK                                                                                                                                              | 25      | 18      | 0        | 0        | 0       | 0       | 0           | 0           | 3.69261         | 0.640467  |
| IP100267407 Aldh8a1 protein<br>SSFANQGEIC*LCTSR                                                                                                                                       | 0       | 0       | 0        | 0        | 10      | 3       | 0           | 0           | 3.628142        | 0.64069   |
| IP100273164 Succinate semialdehyde dehydrogenase, mitochondrial precursor<br>NAGQTC*VCSNR                                                                                             | 1       | 1       | 4        | 3        | 3       | 1       | 5           | 1           | 3.084797        | 0.943454  |
| IP100273646 Glycerinaldehyde-3-phosphate dehydrogenase<br>IVSNASC*TTNCLAPLAK<br>VPTPNVSVVDLTC*R                                                                                       | 8       | 5       | 4        | 11       | 4       | 5       | 0           | 0           | 3.31567         | 0.83853   |
|                                                                                                                                                                                       | 14      | 11      | 10       | 24       | 8       | 8       | 0           | 0           | 4.153904        | 0.860537  |
| IP100283531 Glutathione S-transferase P 2<br>EEVVTIDTWMOGLLKPTC*LYGQLPK                                                                                                               | 0       | 0       | 0        | 8        | 5       | 14      | 0           | 1           | 4.545528        | 1.025334  |
| IP100307637 Elongation factor 1-alpha 1<br>SCDAAIVDMVPGKPMC*VESFSDYPLGR                                                                                                               | 0       | 0       | 0        | 16       | 3       | 1       | 0           | 0           | 3.799774        | 0.611763  |
| IP100308885 60 kDa heat shock protein, mitochondrial precursor<br>AAVEEGVILGGGC*ALLR<br>C*EFQDAYVLLSEK                                                                                | 5       | 7       | 7        | 24       | 5       | 4       | 10          | 2           | 4.19456         | 0.980049  |
|                                                                                                                                                                                       | 0       | 0       | 0        | 2        | 5       | 2       | 0           | 0           | 3.219173        | 0.823307  |
| IP100314041 Villin-1<br>HVETNSC*DVQR                                                                                                                                                  | 0       | 0       | 2        | 2        | 0       | 0       | 0           | 0           | 3.2118          | 0.512272  |
| IP100319994 L-lactate dehydrogenase A chain<br>DYC*VTANSK<br>VIGSGC*NLSAR                                                                                                             | 4       | 0       | 0        | 2        | 2       | 1       | 0           | 0           | 2.7288          | 1.036377  |
|                                                                                                                                                                                       | 12      | 0       | 0        | 20       | 4       | 2       | 0           | 0           | 3.098239        | 0.879986  |
| IP100321375 12 days embryo female mullerian duct includes surrounding region cDNA, RIKEN full-length enriched library, clone:6820408J04 product:biotinidase<br>FGVFTC*FDILFFDPAVR     | 0       | 0       | 0        | 0        | 0       | 10      | 2           | 0           | 4.373085        | 0.844608  |
| IP100323816 Selenium-binding protein 2<br>C*GPGYPTPLEAMK<br>GGSVQVLEDELTC*QPEPLVVK                                                                                                    | 0       | 0       | 0        | 0        | 8       | 5       | 0           | 0           | 2.891245        | 0.75277   |
|                                                                                                                                                                                       | 0       | 0       | 0        | 0        | 7       | 5       | 0           | 0           | 4.869394        | 1.237034  |
| IP100323971 Inosine-5'-monophosphate dehydrogenase 2<br>HGFC*GIPITDTGR                                                                                                                | 0       | 0       | 0        | 0        | 16      | 4       | 0           | 0           | 3.404316        | 0.573711  |
| IP100336324 Malate dehydrogenase, cytoplasmic<br>VIVVGNPANTNC*LTASK                                                                                                                   | 4       | 3       | 2        | 3        | 0       | 0       | 0           | 0           | 3.450115        | 0.79349   |
| IP100378120 Glutaredoxin-related protein 5<br>GTPEQPQC*GFSNAVVOILR                                                                                                                    | 0       | 0       | 0        | 1        | 2       | 0       | 3           | 1           | 3.6336          | 0.655941  |
| IP100395140 L-xylulose reductase<br>ALTNHTVYC*STK                                                                                                                                     | 0       | 0       | 0        | 3        | 3       | 1       | 0           | 0           | 2.895667        | 0.812925  |
| IP100409345 Lambda-crystallin homolog<br>VILSSSSC*LLPSK                                                                                                                               | 2       | 0       | 9        | 21       | 6       | 2       | 0           | 0           | 3.361205        | 0.739109  |
| IP100420718 Hydroxymethylglutaryl-CoA synthase, mitochondrial precursor<br>QAGNNOPTLDDVOYMFHTPFC*K                                                                                    | 0       | 0       | 0        | 0        | 0       | 4       | 4           | 1           | 4.285408        | 0.759121  |
| IP100454049 Enoyl-CoA hydratase, mitochondrial precursor<br>ALNALC*NLIELELNGALETFEODPAVGAIVL                                                                                          | 15      | 14      | 0        | 33       | 12      | 17      | 15          | 1           | 6.075505        | 2.24612   |
| IP100461964 NOD-derived CD11c +ve dendritic cells cDNA, RIKEN full-length enriched library, clone:F630044D15 product:aldehyde dehydrogenase family 6, subfamily A1<br>C*MALSTAILVGEAK | 82      | 28      | 26       | 81       | 45      | 47      | 71          | 2           | 3.750005        | 0.839365  |
| IP100463392 RIKEN cDNA E030049G20 gene<br>EE*PAKITAYQEGLPDEER                                                                                                                         | 0       | 0       | 0        | 2        | 0       | 0       | 4           | 0           | 3.602413        | 0.258302  |
| IP100466069 Elongation factor 2<br>STLIDSLVC*K                                                                                                                                        | 0       | 0       | 4        | 2        | 5       | 2       | 0           | 0           | 2.627891        | 1.068592  |
| IP100467447 Ras GTPase-activating-like protein IQGAP1<br>VNTSSALANISLAEQGC*AVTLLK                                                                                                     | 0       | 0       | 10       | 12       | 0       | 0       | 0           | 0           | 5.0236          | 0.891451  |
| IP100554931 4-hydroxyphenylpyruvate dioxygenase<br>IVFVLC*SALNPWNK                                                                                                                    | 0       | 0       | 0        | 0        | 0       | 19      | 11          | 2           | 3.813522        | 0.688571  |
| IP100625913 32 kDa protein<br>PY*CKLIVSNPVDILTYAVWK<br>PYCK*LLIVSNPVDILTYAVWK                                                                                                         | 0       | 1       | 1        | 3        | 0       | 3       | 0           | 0           | 3.640283        | 0.38287   |
|                                                                                                                                                                                       | 0       | 0       | 0        | 4        | 1       | 3       | 0           | 0           | 3.635258        | 0.624515  |
| IP100653158 14 days embryo liver cDNA, RIKEN full-length enriched library, clone:I530029G20 product:acetyl-Coenzyme A acyltransferase 2<br>YAVGSAC*IGGGQGIALLIIONTA                   | 2       | 5       | 0        | 1        | 5       | 0       | 4           | 2           | 3.940105        | 0.849122  |
| IP100677618 10, 11 days embryo whole body cDNA, RIKEN full-length enriched library, clone:2810420C16 product:hypothetical Transthyretin containing protein<br>LEAPC*QQWMEELR          | 0       | 0       | 0        | 0        | 9       | 5       | 0           | 0           | 3.431882        | 0.654789  |

**Supplementary Information Table 4:** Proteins identified from mouse proteomes treated with the UK probe. Mouse proteomes (soluble proteomes of heart, kidney and liver and membrane proteome of liver) were treated with the UK probe (50  $\mu$ M, 2 hrs) in duplicate. Proteins identified with  $\geq 2$  spectral counts in  $\geq 2$  samples are included. \* Indicates predicted sites of labeling; Average Xcorr values with associated standard deviation is provided for each assigned labeling site.

| PEPTIDE                                                                                                                                                                                                                          | HEART1 | HEART2 | LIVER1 | LIVER2 | KIDNEY1 | KIDNEY2 | LIVER MEM1 | LIVER MEM2 | XCORR (average) | STD. DEV. |
|----------------------------------------------------------------------------------------------------------------------------------------------------------------------------------------------------------------------------------|--------|--------|--------|--------|---------|---------|------------|------------|-----------------|-----------|
| <b>IPi00108042</b> Carbohydrate kinase-like protein<br>AFPFPC*FGQDVDAAFGAALVMLQR                                                                                                                                                 | 0      | 0      | 11     | 11     | 1       | 4       | 0          | 0          | 5.111688        | 1.058886  |
| <b>IPi00108125</b> Eukaryotic translation initiation factor 5A-1<br>YDC*GEEILITVLSAMTEEAIAIK                                                                                                                                     | 15     | 5      | 4      | 1      | 10      | 34      | 22         | 0          | 4.719032        | 1.008221  |
| <b>IPi00108454</b> PREDICTED: similar to 40S ribosomal protein S6<br>LNIFFATGC*GK                                                                                                                                                | 0      | 2      | 0      | 0      | 0       | 1       | 0          | 6          | 2.734861        | 1.36287   |
| <b>IPi00108895</b> 26S protease regulatory subunit 6B<br>GVLMYGPPGC*GK                                                                                                                                                           | 2      | 2      | 0      | 1      | 1       | 4       | 0          | 0          | 2.92393         | 1.415906  |
| <b>IPi00108939</b> glyceraldehyde-3-phosphate dehydrogenase, spermatogenic<br>VPTPNVSVVDLT*CR                                                                                                                                    | 5      | 0      | 0      | 0      | 1       | 3       | 0          | 0          | 3.312478        | 0.815637  |
| <b>IPi00109061</b> ES cells cDNA, RIKEN full-length enriched library, clone:2410129E14 product:tubulin beta-4 chain homolog<br>LTTPTYGLDNLHVSATMSGVITC*LR                                                                        | 8      | 10     | 3      | 1      | 8       | 0       | 0          | 1          | 4.715728        | 1.055684  |
| <b>IPi00109142</b> S-formylglutathione hydrolase<br>CPALYWLSGLTC*TEONFISK<br>SVSAFAPICNPVLC*SWGK                                                                                                                                 | 8      | 19     | 4      | 3      | 20      | 28      | 0          | 0          | 4.374535        | 0.908417  |
| <b>IPi00109169</b> Isocitrate dehydrogenase [NAD] subunit gamma, mitochondrial precursor<br>HAC*VPVDFEEVHVSSNADEEDIR<br>TSLDLYANVHC*K                                                                                            | 7      | 15     | 0      | 0      | 0       | 0       | 0          | 0          | 5.242754        | 1.018447  |
| <b>IPi00109501</b> Ribosome recycling factor, mitochondrial precursor<br>SPOVILNMAFPEC*TAAIK                                                                                                                                     | 3      | 6      | 0      | 0      | 0       | 0       | 0          | 0          | 4.121858        | 0.624564  |
| <b>IPi00109536</b> Aldo-keto reductase family 1, member C21<br>CHCVILNDGNFIPVLGFGTALPLEC*PK<br>VDLC*ATWEAMEK                                                                                                                     | 0      | 0      | 0      | 0      | 14      | 18      | 0          | 0          | 5.281127        | 1.018904  |
| <b>IPi00109655</b> Methionine sulfoxide reductase B2<br>RLDTSLGC*PR                                                                                                                                                              | 4      | 6      | 0      | 0      | 0       | 4       | 0          | 0          | 3.320044        | 0.99874   |
| <b>IPi00110042</b> Selenium-binding protein 1<br>GGSVQVLEDOELTC*QPEPLVVK                                                                                                                                                         | 4      | 0      | 8      | 8      | 0       | 0       | 4          | 4          | 4.35057         | 0.813273  |
| <b>IPi00110528</b> Probable isomerase MAWBP-1<br>WFTPEAFFPLC*GHATLASAAVLFQK                                                                                                                                                      | 0      | 0      | 4      | 4      | 0       | 0       | 0          | 0          | 3.983475        | 0.642507  |
| <b>IPi00110658</b> 13 days embryo liver cDNA, RIKEN full-length enriched library, clone:2510040B16 product:hemoglobin, beta adult major chain, full insert sequence<br>TYFPHFDVSH*GSAQVK<br>IGGH*GAEYGAALER<br>TYFPHFDVSH*GSAQVK | 5      | 0      | 0      | 0      | 0       | 2       | 0          | 0          | 3.002325        | 0.777108  |
| <b>IPi00110753</b> Tubulin alpha-1 chain<br>AVC*MLSNTTAIAEAWAR<br>AYHEQLSVAEITNAC*FEPANQMVK<br>TIOFVDC*PTGFK<br>LADQC*TLGQLGLVHFSFGGGTSGSFTLLMER                                                                                 | 22     | 25     | 2      | 2      | 20      | 14      | 0          | 0          | 4.167546        | 0.969675  |
| <b>IPi00110866</b> Cytidine deaminase<br>IFSGCNENAC*YPLGVCAER                                                                                                                                                                    | 0      | 0      | 0      | 0      | 2       | 4       | 0          | 0          | 4.451863        | 0.59363   |
| <b>IPi00111004</b> Uncharacterized protein C7orf24 homolog<br>NPSAVFC*CVAR                                                                                                                                                       | 2      | 3      | 0      | 0      | 3       | 4       | 0          | 0          | 2.815754        | 1.403764  |
| <b>IPi00111181</b> Vacuolar protein sorting-associated protein 35<br>IANOC*MDPSLQVLFIEILNR                                                                                                                                       | 4      | 0      | 0      | 0      | 3       | 1       | 0          | 0          | 4.613986        | 0.88635   |
| <b>IPi00111315</b> Apolipoprotein A-II precursor<br>T*EQLTPLVR<br>TH*EQLTPLVR                                                                                                                                                    | 3      | 3      | 0      | 0      | 0       | 0       | 0          | 0          | 2.751583        | 0.758319  |
| <b>IPi00111412</b> 60S ribosomal protein L4<br>SQQGAFGNMC*R                                                                                                                                                                      | 0      | 0      | 0      | 0      | 1       | 2       | 3          | 6          | 2.681871        | 1.445144  |
| <b>IPi00111885</b> Ubiquinol-cytochrome-c reductase complex core protein I, mitochondrial precursor<br>YFYDC*PAVAGYPIEQLPDYNR                                                                                                    | 0      | 3      | 0      | 0      | 0       | 1       | 3          | 0          | 5.151122        | 1.044012  |
| <b>IPi00111908</b> Carbamoyl-phosphate synthase [ammonia], mitochondrial precursor<br>TSAC*FEPSLYMVK                                                                                                                             | 0      | 0      | 2      | 3      | 0       | 0       | 0          | 0          | 3.118942        | 0.786098  |
| <b>IPi00111981</b> Isoform 1 of Putative GTP-binding protein 9<br>STFFNVLTSQASAENFPFC*TIDPNESR                                                                                                                                   | 0      | 9      | 0      | 0      | 0       | 5       | 0          | 0          | 4.570258        | 0.785186  |
| <b>IPi00112190</b> RIKEN cDNA 1810022C23 gene<br>ATFHTPFSQLSQIPEAC*STYMFPK                                                                                                                                                       | 0      | 0      | 0      | 0      | 6       | 7       | 0          | 0          | 4.553314        | 0.746329  |
| <b>IPi00112366</b> PREDICTED: similar to isochorismatase domain containing 2<br>IIEKPVDSGLLSLFGQSPILTSC*                                                                                                                         | 5      | 12     | 0      | 0      | 2       | 4       | 0          | 1          | 4.663911        | 0.91293   |
| <b>IPi00113223</b> Fatty acid synthase<br>GPSIALDTAC*SSLLALONAYQAIR                                                                                                                                                              | 0      | 0      | 6      | 5      | 5       | 8       | 0          | 4          | 4.380412        | 0.934703  |
| <b>IPi00113347</b> Carnitine O-acetyltransferase<br>SMIDNETLPVEFLGGQPLC*MQYQILSSCR                                                                                                                                               | 2      | 12     | 0      | 0      | 0       | 1       | 0          | 0          | 4.30035         | 0.983289  |
| <b>IPi00113377</b> 60S acidic ribosomal protein P1<br>ALANVIGSLC*NVGAGGPAPAAGAAPAGGAAP*                                                                                                                                          | 1      | 8      | 0      | 0      | 2       | 6       | 18         | 15         | 7.388889        | 2.705562  |
| <b>IPi00114330</b> Homogentisate 1,2-dioxygenase<br>TCSC*LDENYK                                                                                                                                                                  | 0      | 0      | 1      | 1      | 2       | 2       | 1          | 3          | 3.099342        | 1.340815  |
| <b>IPi00114396</b> Isoform Long of Galectin-9<br>GMPFELC*FLVQR                                                                                                                                                                   | 0      | 0      | 0      | 0      | 0       | 0       | 3          | 9          | 3.105272        | 0.893762  |

| PEPTIDE                                                                                                                                                                                                                                                                                                          | HEART1 | HEART2 | LIVER1 | LIVER2 | KIDNEY1 | KIDNEY2 | LIVER MEM1 | LIVER MEM2 | XCORR (average) | STD. DEV. |
|------------------------------------------------------------------------------------------------------------------------------------------------------------------------------------------------------------------------------------------------------------------------------------------------------------------|--------|--------|--------|--------|---------|---------|------------|------------|-----------------|-----------|
| <b>PI00114416</b> 3,2-trans-enoyl-CoA isomerase, mitochondrial precursor<br>GVILTSEC*PGIFSAGLDLLEMYGR 33 45 7 4 12 11 0 11<br>LRNPPVNSLSLECL*TEFTISLEK 13 11 0 0 0 1 0 0<br>GVILTSE*CPGIFSAGLDLLEMYGR 2 3 0 0 0 0 0 0<br>GVILTS*ECPGIFSAGLDLLEMYGR 2 3 0 0 0 0 0 0<br>GVILT*SECPIGIFSAGLDLLEMYGR 2 3 0 0 0 0 0 0 |        |        |        |        |         |         |            |            | 5.570855        | 1.536658  |
| <b>PI00114472</b> PREDICTED: similar to ribosomal protein L27a<br>NQSFC*PTVNLKDLWTLVSEQTR 0 4 0 0 1 4 16 33                                                                                                                                                                                                      |        |        |        |        |         |         |            |            | 4.383024        | 0.938454  |
| <b>PI00115302</b> Branched chain ketoacid dehydrogenase E1, beta polypeptide<br>SGDLFNC*GSLTIR 0 1 0 0 0 2 0 4                                                                                                                                                                                                   |        |        |        |        |         |         |            |            | 2.914358        | 1.151209  |
| <b>PI00115569</b> Dihydropyridyl dehydrogenase, mitochondrial precursor<br>VLGAHILGPAGEMVNEAALALEYGASC*EDIAR 13 20 0 0 1 8 0 0<br>NETLGGTC*LVNGCIPSK 4 4 0 0 2 4 0 0<br>AEVITCDVLLVC*IGR 5 5 0 0 0 0 0 0                                                                                                         |        |        |        |        |         |         |            |            | 6.070539        | 1.950744  |
| <b>PI00115598</b> Isoform Short of Estradiol 17-beta-dehydrogenase 8<br>LLEEVOAC*FSRPPSVVSCAGITR 2 4 0 0 0 3 0 0                                                                                                                                                                                                 |        |        |        |        |         |         |            |            | 4.445672        | 0.920765  |
| <b>PI00115751</b> 9.5 days embryo parthenogenote cDNA, RIKEN full-length enriched library, clone:B130049K07 product:eukaryotic translation initiation factor 3, subunit 7 (zeta, 66/67 kDa), full length<br>FMTPIQDNPSGWGPC*AVPEQFR 0 6 0 0 0 2 9 6                                                              |        |        |        |        |         |         |            |            | 4.182999        | 0.810356  |
| <b>PI00115827</b> Protein NipSnap2<br>QYPC*TLVGTWNTWYGEQDQAVHLWR 6 10 0 0 0 0 0 0                                                                                                                                                                                                                                |        |        |        |        |         |         |            |            | 3.928352        | 0.674461  |
| <b>PI00116074</b> Aconitate hydratase, mitochondrial precursor<br>DVGGIVLANACGPC*IGOWDRK 13 13 0 0 4 9 0 0<br>DVGGIVLANACGPC*IGOWDR 10 13 0 0 4 4 0 0<br>DVGGIVLANAC*GPCIGOWDRK 6 9 0 0 0 1 0 0                                                                                                                  |        |        |        |        |         |         |            |            | 4.061127        | 0.864145  |
| <b>PI00116170</b> NADH-ubiquinone oxidoreductase chain 3<br>ANPYEC*GFDPTSSAR 0 0 0 0 0 0 3 3                                                                                                                                                                                                                     |        |        |        |        |         |         |            |            | 3.050983        | 0.853272  |
| <b>PI00116192</b> Thioredoxin-dependent peroxide reductase, mitochondrial precursor<br>AFQFVETHGEVC*PANWTPESPTIKPSPTASK 3 5 0 0 6 0 0 0                                                                                                                                                                          |        |        |        |        |         |         |            |            | 5.445049        | 1.40471   |
| <b>PI00116222</b> 3-hydroxyisobutyrate dehydrogenase, mitochondrial precursor<br>HGYPLLYDVFPDVC*K 9 0 0 0 8 1 0 0                                                                                                                                                                                                |        |        |        |        |         |         |            |            | 4.102988        | 0.846446  |
| <b>PI00116277</b> T-complex protein 1 subunit delta<br>IGLIQFC*LSAPK 4 2 0 2 4 4 0 12<br>SIHDALC*VIR 5 5 0 0 0 5 0 4<br>AQDIEAGDGTSSVIIAGSLDSC*TK 2 3 0 0 4 3 0 0                                                                                                                                                |        |        |        |        |         |         |            |            | 2.780399        | 1.570238  |
| <b>PI00116489</b> Atrial natriuretic factor precursor<br>IGAQSGLGC*NSFR 3 3 0 0 0 0 0 0                                                                                                                                                                                                                          |        |        |        |        |         |         |            |            | 2.922667        | 1.064495  |
| <b>PI00116591</b> Short-chain specific acyl-CoA dehydrogenase, mitochondrial precursor<br>IGIASQALGIAQASLDC*AVK 53 55 0 0 14 17 2 17                                                                                                                                                                             |        |        |        |        |         |         |            |            | 4.994401        | 1.142153  |
| <b>PI00116613</b> CCAAT/enhancer-binding protein beta<br>AAPAAC*FAGPPAAPAK 0 0 0 0 0 2 4 4                                                                                                                                                                                                                       |        |        |        |        |         |         |            |            | 3.435038        | 0.99822   |
| <b>PI00116753</b> Electron transfer flavoprotein subunit alpha, mitochondrial precursor<br>TIYAGNALC*TVK 4 2 0 0 2 4 0 0                                                                                                                                                                                         |        |        |        |        |         |         |            |            | 2.79085         | 1.437091  |
| <b>PI00117007</b> MKIAA0120 protein (Fragment)<br>QYDADLEQLIQWITTC*R 0 0 0 0 3 3 0 0                                                                                                                                                                                                                             |        |        |        |        |         |         |            |            | 3.882633        | 0.546798  |
| <b>PI00117264</b> Protein DJ-1<br>VTVAGLAGKDPVQC*SR 4 8 0 0 1 1 0 0                                                                                                                                                                                                                                              |        |        |        |        |         |         |            |            | 3.625497        | 1.052074  |
| <b>PI00117281</b> Isoform Mitochondrial of Phospholipid hydroperoxide glutathione peroxidase, mitochondrial precursor<br>ILAFPC*NQFR 0 0 0 0 2 3 0 0                                                                                                                                                             |        |        |        |        |         |         |            |            | 2.732508        | 1.02873   |
| <b>PI00117312</b> Aspartate aminotransferase, mitochondrial precursor<br>NLDKEYLPIGGLAFC*K 11 30 0 0 2 8 0 0<br>HFIEQGINVCLC*OSYAK 5 14 0 0 0 0 0 0                                                                                                                                                              |        |        |        |        |         |         |            |            | 4.14842         | 0.871227  |
| <b>PI00117348</b> Tubulin alpha-2 chain<br>AVC*MLSNTTAIAEAWAR 22 0 2 2 20 14 0 0<br>AYHEQLSVAEITNAC*FEPANQMVK 9 0 0 0 4 30 0 0<br>SIQFVDWC*PTGFK 5 0 1 1 5 10 0 5<br>LDQC*TLQGLFVHFSFGGTTGSGFTSLLMER 3 0 4 0 6 6 0 0                                                                                             |        |        |        |        |         |         |            |            | 4.185585        | 0.950547  |
| <b>PI00117350</b> Tubulin alpha-4 chain<br>AVC*MLSNTTAIAEAWAR 22 25 0 0 20 14 0 0<br>AYHEQLSVAEITNAC*FEPANQMVK 9 31 0 0 4 30 0 0<br>SIQFVDWC*PTGFK 5 14 0 0 5 10 0 0<br>LSDQC*TLQGLFVHFSFGGTTGSGFTSLLMER 4 0 0 0 5 7 0 0<br>TIGGGDDSFITFFC*ETGAGK 0 3 0 0 2 5 0 0                                                |        |        |        |        |         |         |            |            | 4.251594        | 0.916818  |
| <b>PI00117569</b> 40S ribosomal protein S11<br>DVOIGDIVTGC*RPLSK 0 0 0 0 0 1 2 9                                                                                                                                                                                                                                 |        |        |        |        |         |         |            |            | 3.661359        | 0.779485  |
| <b>PI00117570</b> Growth-arrest-specific protein 2<br>LDNGALLC*QLAATVQEK 0 0 0 0 2 3 0 0                                                                                                                                                                                                                         |        |        |        |        |         |         |            |            | 4.072825        | 0.610875  |
| <b>PI00118059</b> Serine hydroxymethyltransferase, cytosolic<br>LIAGTSC*YSR 0 0 2 1 2 0 0 0                                                                                                                                                                                                                      |        |        |        |        |         |         |            |            | 2.9954          | 1.245301  |
| <b>PI00118153</b> Cysteine and glycine-rich protein 3<br>GIGFGQGAGC*LSTDTGEHLGLOFQOSP 7 16 0 0 0 0 0 0<br>GIGFGQGAGC*LSTDTGEHLGLOFQOSP 9 9 0 0 0 0 0 0<br>TCFHCMACR 3 2 0 0 0 0 0 0                                                                                                                              |        |        |        |        |         |         |            |            | 4.751402        | 0.774105  |
| <b>PI00118344</b> UDP-glucose 6-dehydrogenase<br>ISSINSISALC*EATGADVEEVATAIGMDQR 0 0 0 0 2 5 0 0                                                                                                                                                                                                                 |        |        |        |        |         |         |            |            | 5.99587         | 0.709929  |
| <b>PI00118676</b> Eukaryotic initiation factor 4A1<br>VVMALGDYMGASCHAC*IGGTNVR 0 0 0 0 2 0 3 3                                                                                                                                                                                                                   |        |        |        |        |         |         |            |            | 4.084292        | 0.699035  |
| <b>PI00118966</b> ATP synthase O subunit, mitochondrial precursor<br>GEVPC*TVTTASPLDDAVLSELK 0 3 0 0 0 6 5 5                                                                                                                                                                                                     |        |        |        |        |         |         |            |            | 4.598804        | 0.822757  |
| <b>PI00119004</b> hypothetical protein LOC67732<br>VILITPPPLC*EAWEK 0 0 0 0 10 11 0 0                                                                                                                                                                                                                            |        |        |        |        |         |         |            |            | 2.83369         | 1.030208  |
| <b>PI00119087</b> Uroporphyrinogen-III synthase<br>GLPVSVC*TAESPTPOALAAGIR 3 4 0 0 2 4 0 0                                                                                                                                                                                                                       |        |        |        |        |         |         |            |            | 4.146138        | 0.785005  |
| <b>PI00119112</b> Vacuolar ATP synthase catalytic subunit A, ubiquitous isoform<br>VLDALFPVCVQGGTTAIPGAFGC*GK 0 0 0 0 13 15 0 0                                                                                                                                                                                  |        |        |        |        |         |         |            |            | 3.840205        | 0.649815  |
| <b>PI00119113</b> Bone marrow macrophage cDNA, RIKEN full-length enriched library, clone:I830083B18 product:ATPase, H+ transporting, V1 subunit B, isoform 2, full insert sequence<br>GPVLAEDFLDIMGQPINPQC*R 0 0 0 0 4 8 0 0                                                                                     |        |        |        |        |         |         |            |            | 5.5092          | 0.918527  |
| <b>PI00119219</b> Isoform 1 of Estradiol 17-beta-dehydrogenase 12<br>AFOVWC*VGNEALVGR 0 0 0 0 0 0 2 18                                                                                                                                                                                                           |        |        |        |        |         |         |            |            | 4.054925        | 0.688656  |
| <b>PI00119667</b> Elongation factor 1-alpha 2<br>SGDAIVEMVPGKPMC*VESFSQYPLGR 10 13 0 0 0 0 0 0<br>NMITGTSQADC*AVLIVAAGVGEFEAGISK 10 7 0 0 0 0 0 0                                                                                                                                                                |        |        |        |        |         |         |            |            | 4.591518        | 0.691104  |
| <b>PI00119842</b> Short/branched chain specific acyl-CoA dehydrogenase, mitochondrial precursor<br>VDASVALLC*DIONTIINLFR 7 11 0 0 8 15 1 5<br>ASSTC*QLTFENVKVPETNILGK 1 4 0 0 1 4 0 0                                                                                                                            |        |        |        |        |         |         |            |            | 5.085773        | 1.191275  |
| <b>PI00119930</b> 5'-AMP-activated protein kinase subunit gamma-1<br>EYVLDQSFKPLVC*ISPNASLFDVSSLIR 4 10 0 0 1 1 0 0                                                                                                                                                                                              |        |        |        |        |         |         |            |            | 4.708225        | 0.948917  |
| <b>PI00120076</b> Creatine kinase, sarcomeric mitochondrial precursor<br>LGYLTC*PSNLGTGLR 34 35 0 0 2 2 0 0<br>SEVELVQIVDGVNYLVDC*EK 12 16 0 0 0 0 0 0<br>MTPSGYTLQDC*IQTVGDNPGHFFIK 6 10 0 0 0 0 0 0                                                                                                            |        |        |        |        |         |         |            |            | 3.942655        | 0.926466  |

| PEPTIDE                                                                                                                                                                                                                                                                                                                                                                                                     | HEART1 | HEART2 | LIVER1 | LIVER2 | KIDNEY1 | KIDNEY2 | LIVER MEM1 | LIVER MEM2 | XCORR    | STD. DEV. (average) |
|-------------------------------------------------------------------------------------------------------------------------------------------------------------------------------------------------------------------------------------------------------------------------------------------------------------------------------------------------------------------------------------------------------------|--------|--------|--------|--------|---------|---------|------------|------------|----------|---------------------|
| IP100120165 Peroxisomal carnitine O-octanoyltransferase<br>AFVFDVLHEGC*LITPPELLR                                                                                                                                                                                                                                                                                                                            | 0      | 0      | 0      | 0      | 3       | 7       | 0          | 0          | 3.909005 | 0.846413            |
| IP100121280 12 days embryo embryonic body between diaphragm region and neck cDNA, RIKEN full-length enriched library, clone:9430034P22 product:Glutathione S-transferase Yb-3 (EC 2.3.1.1)<br>KHNLG*GETEER                                                                                                                                                                                                  | 3      | 2      | 0      | 0      | 2       | 0       | 0          | 0          | 3.099183 | 1.131248            |
| IP100121348 L-serine dehydratase<br>ETLSAKPGAILVSVGGGLL*GVVQGLR<br>LQTPLASLVVIV*GGSNISLAQLQALK                                                                                                                                                                                                                                                                                                              | 0      | 0      | 6      | 7      | 0       | 0       | 0          | 0          | 5.582112 | 1.053565            |
| IP100121440 Electron transfer flavoprotein subunit beta<br>HSMNPFCEIAVEEAVR<br>QAIDDDC*NOTGQMTAGLLDWPOGTFASQVTL<br>EIIAVSCGPSQC*QETIR                                                                                                                                                                                                                                                                       | 2      | 6      | 0      | 0      | 0       | 0       | 0          | 0          | 3.498983 | 0.611419            |
| IP100121566 GMP reductase 1<br>VGVGPGSVC*TTR                                                                                                                                                                                                                                                                                                                                                                | 3      | 3      | 0      | 0      | 2       | 3       | 0          | 0          | 2.76755  | 1.46312             |
| IP100121758 TAR DNA-binding protein 43<br>VTEDEDEPIEIPSEDDGTLLSTVTAQFPGAC*G                                                                                                                                                                                                                                                                                                                                 | 0      | 1      | 0      | 0      | 0       | 2       | 3          | 0          | 5.538489 | 1.098867            |
| IP100121788 Peroxiredoxin-1<br>HGEVC*PAGWKPGSDTIKPDVNK<br>LNCQVIGASVDSHFC*HLAWINTPK                                                                                                                                                                                                                                                                                                                         | 5      | 0      | 12     | 9      | 3       | 65      | 1          | 0          | 4.095454 | 0.913619            |
| IP100121833 3-ketoacyl-CoA thiolase A, peroxisomal precursor<br>AGLTVNDIDIFEINAFASQAAYVC*VEK                                                                                                                                                                                                                                                                                                                | 0      | 0      | 0      | 0      | 1       | 3       | 1          | 4          | 4.513827 | 0.841643            |
| IP100122075 Mitochondrial antiviral signaling protein<br>FCCVDVLEILPYS*LTASDQDR                                                                                                                                                                                                                                                                                                                             | 0      | 0      | 0      | 0      | 3       | 4       | 0          | 0          | 5.4117   | 1.421662            |
| IP100122634 Cytochrome P450, family 2, subfamily a, polypeptide 12<br>MLOGTC*GAPIDPTIYLSK<br>IQEEAGC*LIK                                                                                                                                                                                                                                                                                                    | 0      | 0      | 0      | 0      | 0       | 0       | 3          | 6          | 3.926158 | 0.617994            |
| IP100122684 Eno2 protein (Fragment)<br>SGETEDTFIADLVVGLC*TGQIK                                                                                                                                                                                                                                                                                                                                              | 8      | 9      | 0      | 0      | 0       | 0       | 0          | 0          | 4.332102 | 0.836946            |
| IP100122740 Protein LRP16<br>LEVDAIVNAANSLLGGGGVDGC*IHR                                                                                                                                                                                                                                                                                                                                                     | 4      | 3      | 0      | 0      | 0       | 0       | 0          | 0          | 4.752042 | 1.016974            |
| IP100122743 Aspartyl-tRNA synthetase, cytoplasmic<br>LEYC*EALAMLR                                                                                                                                                                                                                                                                                                                                           | 1      | 2      | 3      | 1      | 4       | 6       | 0          | 6          | 3.046305 | 1.395217            |
| IP100123006 GDP-mannose pyrophosphorylase A<br>LLPAITLGC*R                                                                                                                                                                                                                                                                                                                                                  | 2      | 2      | 0      | 2      | 4       | 6       | 0          | 0          | 2.80744  | 1.520255            |
| IP100123619 Cytochrome P450, family 2, subfamily d, polypeptide 22<br>VQOEIDVIGQVQC*PEMADQAR                                                                                                                                                                                                                                                                                                                | 0      | 0      | 0      | 0      | 0       | 0       | 3          | 2          | 4.718667 | 0.729775            |
| IP100123651 ATP-dependent RNA helicase DDX19A<br>VLVTTNVC*AR                                                                                                                                                                                                                                                                                                                                                | 1      | 2      | 1      | 0      | 2       | 2       | 0          | 2          | 2.768175 | 1.570999            |
| IP100123975 Glycerol kinase-like protein 2<br>GIIC*GLTOFTNK                                                                                                                                                                                                                                                                                                                                                 | 0      | 0      | 0      | 0      | 3       | 8       | 0          | 0          | 3.180419 | 0.823171            |
| IP100124103 Copper chaperone for superoxide dismutase<br>GMSSQLQNLGAAVAILEGC*GSIQGVVR                                                                                                                                                                                                                                                                                                                       | 2      | 3      | 2      | 2      | 4       | 6       | 0          | 0          | 5.224846 | 1.248554            |
| IP100124225 Proteasome activator complex subunit 2<br>QNLFOEADDFLC*TFLPR                                                                                                                                                                                                                                                                                                                                    | 1      | 10     | 1      | 0      | 4       | 2       | 0          | 0          | 3.61088  | 0.984092            |
| IP100124372 aldehyde dehydrogenase 9, subfamily A1<br>TVC*VEMGDVSAF                                                                                                                                                                                                                                                                                                                                         | 0      | 0      | 0      | 0      | 2       | 4       | 0          | 0          | 2.897563 | 0.903546            |
| IP100124444 Isoform 1 of 6-phosphofructokinase type C<br>WDC*VSSILQVGGTIIGSAR                                                                                                                                                                                                                                                                                                                               | 0      | 9      | 0      | 0      | 4       | 0       | 0          | 0          | 4.127578 | 0.703725            |
| IP100124819 Coronin-1B<br>NVLLSAGC*DNVLIWVNGTAEELR                                                                                                                                                                                                                                                                                                                                                          | 0      | 4      | 0      | 0      | 3       | 1       | 0          | 0          | 4.505086 | 0.966567            |
| IP100124900 Isoform 1 of Methylglutaconyl-CoA hydratase, mitochondrial precursor<br>SEVPGIFC*AGADLK                                                                                                                                                                                                                                                                                                         | 2      | 3      | 0      | 0      | 0       | 1       | 0          | 0          | 3.050261 | 1.200662            |
| IP100125135 Ubiquitin-conjugating enzyme E2 D2<br>IYHPNINSGSIC*LDILR<br>VLLSICSLC*DPNDDPLVPEIAR                                                                                                                                                                                                                                                                                                             | 11     | 8      | 0      | 0      | 4       | 5       | 1          | 0          | 3.660672 | 1.038639            |
| IP100125325 Peroxisomal 2,4-dienoyl-CoA reductase<br>INILINCAAGNFLC*PASALSFNFAK                                                                                                                                                                                                                                                                                                                             | 0      | 1      | 1      | 0      | 2       | 5       | 1          | 11         | 4.948558 | 1.100794            |
| IP100125521 40S ribosomal protein S5<br>VNQAIWLLC*TGAR                                                                                                                                                                                                                                                                                                                                                      | 0      | 0      | 0      | 0      | 3       | 0       | 0          | 18         | 3.006219 | 0.881482            |
| IP100125853 Mitochondrial ornithine transporter 1<br>LSDLQNAAGSFASAFALVLC*PTLVK                                                                                                                                                                                                                                                                                                                             | 0      | 1      | 0      | 0      | 0       | 0       | 7          | 20         | 5.792662 | 1.12812             |
| IP100125960 Protein NDRG1<br>FALNNPEMVEGLVLMNVNVC*AEGWMDWAASK                                                                                                                                                                                                                                                                                                                                               | 0      | 0      | 0      | 0      | 4       | 4       | 0          | 0          | 5.01815  | 0.814445            |
| IP100126172 Ester hydrolase C11orf54 homolog<br>AHIMPAEFSSC*PLNSDEAVNK<br>APLVC*LPVFSVK                                                                                                                                                                                                                                                                                                                     | 2      | 0      | 0      | 1      | 13      | 36      | 1          | 0          | 4.05144  | 0.8907              |
| IP100126208 11 days embryo whole body cDNA, RIKEN full-length enriched library, clone:2700082N11 product:hemoglobin, beta adult major chain, full insert sequence<br>GTFASLSELHC*DK<br>AAVSGLWVK*VNADEVGGALGR<br>YFDSFGDLSASAIMGNAK*VK<br>GTFASLSELHCD*K<br>VITAFNDGLNHL*SLK<br>AAVS*GLWGVNADEVGGALGR<br>YFDSFGDLSAS*AIMGNAKVK<br>KVITAFNDGLNH*LDLTK<br>VITAFNDGLNH*LDLTK<br>GTFASLSELHC*DK<br>VVAGVAALAH*K | 25     | 32     | 3      | 4      | 5       | 17      | 2          | 12         | 2.727417 | 1.71339             |
| IP100126680 Adult male kidney cDNA, RIKEN full-length enriched library, clone:0610009G07 product:glutathione S-transferase, theta 2, full insert sequence<br>GOHMSEQFSOVNCLNK<br>GOHMSEQFSOVNCLNKVPVVK                                                                                                                                                                                                      | 0      | 0      | 6      | 4      | 11      | 16      | 0          | 0          | 3.864564 | 0.850918            |
| IP100126826 Histamine N-methyltransferase<br>DDLCC*QVYVSSDLAOLDDLKIK                                                                                                                                                                                                                                                                                                                                        | 3      | 5      | 3      | 2      | 6       | 4       | 0          | 0          | 3.759783 | 0.557783            |
| IP100126940 Isoform Long of Adenosine kinase<br>TGC*TFPEKPDFH                                                                                                                                                                                                                                                                                                                                               | 4      | 1      | 2      | 0      | 1       | 4       | 0          | 0          | 4.78263  | 1.042373            |
| IP100127206 Fructose-bisphosphate aldolase B<br>IADQC*PSSLAIOENANALAR                                                                                                                                                                                                                                                                                                                                       | 0      | 0      | 0      | 0      | 2       | 8       | 0          | 0          | 3.25764  | 1.207429            |
| IP100127625 Hydroxymethylglutaryl-CoA lyase, mitochondrial precursor<br>NANC*SEESFOR                                                                                                                                                                                                                                                                                                                        | 0      | 1      | 0      | 0      | 2       | 3       | 0          | 0          | 5.598113 | 0.778763            |
| IP100127707 Isoform 1 of Poly(rC)-binding protein 2<br>LVVPASOC*GSLGK<br>INISEGNC*PER                                                                                                                                                                                                                                                                                                                       | 1      | 1      | 0      | 0      | 3       | 3       | 0          | 1          | 3.053194 | 1.018269            |
| IP100127989 Prostaglandin E synthase 3<br>HLNEIDL FHC*DPNDSK                                                                                                                                                                                                                                                                                                                                                | 0      | 0      | 0      | 0      | 2       | 3       | 0          | 1          | 2.77172  | 1.462293            |
| IP100128209 Adenylate kinase isoenzyme 1<br>KVNAGTVDTVFSEVC*TYLDSLK<br>VNAAGTVDTVFSEVC*TYLDSLK                                                                                                                                                                                                                                                                                                              | 35     | 85     | 0      | 0      | 0       | 3       | 0          | 0          | 2.628922 | 1.344156            |
| IP100128267 PREDICTED: similar to 60S ribosomal protein L32<br>ELEVLLMC*NK                                                                                                                                                                                                                                                                                                                                  | 24     | 37     | 0      | 0      | 2       | 3       | 0          | 0          | 3.65056  | 0.948684            |
|                                                                                                                                                                                                                                                                                                                                                                                                             | 0      | 0      | 0      | 0      | 0       | 0       | 3          | 5          | 4.80389  | 1.032332            |
|                                                                                                                                                                                                                                                                                                                                                                                                             |        |        |        |        |         |         |            |            | 4.143552 | 0.935455            |
|                                                                                                                                                                                                                                                                                                                                                                                                             |        |        |        |        |         |         |            |            | 2.954017 | 0.909719            |

| PEPTIDE                                                                                                                                                                                    | HEART1           | HEART2           | LIVER1           | LIVER2           | KIDNEY1          | KIDNEY2          | LIVER MEM1       | LIVER MEM2    | XCORR (average)                            | STD. DEV.                                    |
|--------------------------------------------------------------------------------------------------------------------------------------------------------------------------------------------|------------------|------------------|------------------|------------------|------------------|------------------|------------------|---------------|--------------------------------------------|----------------------------------------------|
| <b>IPI00128376 Aldo-keto reductase family 1, member C14</b><br>SKDILVSYC*TLGSSR<br>SPVLLDDPVLCA*AMANK                                                                                      | 0                | 0                | 6                | 3                | 10               | 19               | 0                | 0             | 4.258152                                   | 0.94793                                      |
| <b>IPI00128518 S-adenosylmethionine synthetase isoform type-1</b><br>TGMVLLC*GEITSVAMVDYQR                                                                                                 | 0                | 0                | 8                | 8                | 0                | 0                | 0                | 0             | 4.634206                                   | 0.823943                                     |
| <b>IPI00128760 Ubiquitin-conjugating enzyme E2 L3</b><br>GQVC*LPVISAENWKPKTK                                                                                                               | 7                | 2                | 0                | 3                | 6                | 2                | 0                | 1             | 3.815264                                   | 0.97781                                      |
| <b>IPI00128791 Heat-shock protein beta-6</b><br>FGEGLLEAELASLC*PAAIAPYYLR                                                                                                                  | 29               | 48               | 0                | 0                | 1                | 1                | 0                | 0             | 4.529149                                   | 0.984369                                     |
| <b>IPI00128873 Nitrilase 1</b><br>THLC*DVEIPGQGPMPR                                                                                                                                        | 0                | 0                | 0                | 0                | 2                | 4                | 0                | 0             | 3.836775                                   | 0.636184                                     |
| <b>IPI00128904 Poly(rC)-binding protein 1</b><br>LVVPATQC*GSLIGK<br>GYWASLDASTQTTHLETIPNNLIGC*IIIGR<br>INISEGNC*PER                                                                        | 5<br>1<br>0      | 5<br>4<br>0      | 2<br>0<br>0      | 2<br>0<br>0      | 3<br>3<br>2      | 7<br>7<br>3      | 0<br>1<br>1      | 6             | 2.874496<br>4.689434<br>2.605392           | 1.546735<br>0.881532<br>1.523572             |
| <b>IPI00129164 Sepiapterin reductase</b><br>TVVNISSL*ALOPYK<br>SDGALVDC*GTSQAQK                                                                                                            | 15<br>1          | 7<br>2           | 5<br>0           | 3<br>0           | 14<br>1          | 15<br>2          | 0<br>0           | 3             | 3.58894<br>3.001188                        | 1.117575<br>1.203694                         |
| <b>IPI00129517 Isoform Mitochondrial of Peroxiredoxin-5, mitochondrial precursor</b><br>ALNVEPDGTGLTC*SLAPNILSQL<br>GFVLFVPGAFTPGC*SK<br>FEALAAHDALVELSGAMNTAAC*SLMK                       | 7<br>3<br>6      | 6<br>5<br>8      | 0<br>0<br>0      | 0<br>0<br>0      | 6<br>5<br>0      | 6<br>5<br>1      | 0<br>0<br>0      | 0             | 3.924354<br>3.429605<br>5.027172           | 1.028492<br>1.027609<br>1.140451             |
| <b>IPI00130000 Puromycin-sensitive aminopeptidase</b><br>LPAEVPSPINYSLC*LKPDLLDFTFEGK                                                                                                      | 2                | 12               | 0                | 0                | 0                | 5                | 0                | 0             | 4.023423                                   | 0.724985                                     |
| <b>IPI00130173 Ubiquitin-like 1-activating enzyme E1B</b><br>VLVVGAGGIGC*ELLK                                                                                                              | 0                | 1                | 0                | 0                | 3                | 3                | 0                | 0             | 3.715422                                   | 0.742533                                     |
| <b>IPI00130280 ATP synthase subunit alpha, mitochondrial precursor</b><br>YTIVVSATASDAAPLQYLAPYSGC*SMGEYFR                                                                                 | 19               | 20               | 0                | 0                | 1                | 6                | 13               | 33            | 4.880809                                   | 1.130696                                     |
| <b>IPI00130344 Chloride intracellular channel protein 1</b><br>LHIVQVC*K                                                                                                                   | 0                | 0                | 0                | 0                | 4                | 3                | 0                | 0             | 2.761175                                   | 1.080245                                     |
| <b>IPI00130521 Ubiquitin-conjugating enzyme E2 A</b><br>MFHPNVYADGSIC*LDLQNR                                                                                                               | 4                | 9                | 0                | 0                | 2                | 0                | 0                | 0             | 4.269494                                   | 0.79749                                      |
| <b>IPI00130530 Glyoxylate reductase/hydroxyppyruvate reductase</b><br>VGYTPGVLTDAEALVSLLLTTC*R                                                                                             | 0                | 0                | 4                | 4                | 6                | 9                | 0                | 0             | 4.271638                                   | 0.787473                                     |
| <b>IPI00130950 Betaine-homocysteine S-methyltransferase</b><br>QVADEGDALVAGVSGTSPYSLC*K                                                                                                    | 0                | 0                | 8                | 7                | 0                | 1                | 7                | 12            | 5.208183                                   | 1.20432                                      |
| <b>IPI00131204 UDP-glucose pyrophosphorylase 2</b><br>LNGGLGSMGC*K                                                                                                                         | 2                | 1                | 0                | 0                | 1                | 0                | 0                | 3             | 2.792625                                   | 1.383268                                     |
| <b>IPI00131357 11 days embryo whole body cDNA, RIKEN full-length enriched library, clone:2700086E01 product:ribosomal protein S23, full insert sequence</b><br>ITAFVPNDGC*LNFIENDEVLVAGFGR | 0                | 9                | 0                | 0                | 2                | 11               | 17               | 23            | 4.602263                                   | 0.979998                                     |
| <b>IPI00131438 Phosphoenolpyruvate carboxykinase, cytosolic</b><br>YLAAAFPSAC*GK<br>FCTPASQC*PIIDPAWESGVPPIEGIIIFGGR                                                                       | 0<br>0           | 0<br>0           | 1<br>0           | 0                | 5<br>3           | 5<br>6           | 0<br>0           | 0             | 3.184567<br>6.192583                       | 0.969835<br>1.283874                         |
| <b>IPI00131478 Arylsulfotransferase ST1A4</b><br>IPFLFSC*PGVPPGLETLK                                                                                                                       | 0                | 0                | 5                | 0                | 0                | 0                | 2                | 7             | 3.821921                                   | 0.872023                                     |
| <b>IPI00131695 Serum albumin precursor</b><br>AHCLSEVEHD*TMPADLPAIAADFVEDQEVCK<br>AHCLS*EVEHDTMPADLPAIAADFVEDQEVCK<br>AHCLSEVEHDT*MPADLPAIAADFVEDQEVCK<br>AH*CLSEVEHDTMPADLPAIAADFVEDQEVCK | 2<br>2<br>2<br>2 | 8<br>8<br>8<br>8 | 0<br>0<br>0<br>0 | 0<br>0<br>0<br>0 | 0<br>0<br>0<br>0 | 0<br>0<br>0<br>0 | 0<br>0<br>0<br>0 | 0             | 5.430644<br>5.826906<br>5.1167<br>6.361644 | 0.980099<br>1.032668<br>0.935152<br>1.674172 |
| <b>IPI00132042 Pyruvate dehydrogenase E1 component subunit beta, mitochondrial precursor</b><br>TNHLVTVEGGWPOFGVGAEIC*AR                                                                   | 25               | 54               | 0                | 0                | 7                | 13               | 7                | 0             | 5.602756                                   | 1.420883                                     |
| <b>IPI00132076 Isoform Membrane-bound of Catechol O-methyltransferase</b><br>EYRPSLVLELGAYC*GYSAVR                                                                                         | 12               | 21               | 6                | 5                | 12               | 26               | 3                | 70            | 4.297608                                   | 0.959212                                     |
| <b>IPI00132080 6-phosphogluconolactonase</b><br>TGALC*WFLDEAAAR                                                                                                                            | 3                | 3                | 0                | 0                | 2                | 1                | 0                | 0             | 3.005788                                   | 1.299957                                     |
| <b>IPI00132388 Basic leucine zipper and W2 domain-containing protein 1</b><br>FDPTQFQDC*IIQGLTETGTDLEAVAK                                                                                  | 4                | 5                | 1                | 2                | 7                | 8                | 3                | 29            | 5.221656                                   | 1.238398                                     |
| <b>IPI00132653 Succinyl-CoA:3-ketoacid-coenzyme A transferase 1, mitochondrial precursor</b><br>DIPNGATLLVGGFGLC*GIPENLIGALLK                                                              | 13               | 7                | 0                | 0                | 7                | 11               | 0                | 0             | 3.859885                                   | 0.888851                                     |
| <b>IPI00132958 Thioesterase superfamily member 2</b><br>LGTLHGGLTATLVDSTMALMC*TER                                                                                                          | 41               | 18               | 0                | 0                | 12               | 15               | 0                | 0             | 5.281679                                   | 1.20063                                      |
| <b>IPI00133006 Acyl carrier protein, mitochondrial precursor</b><br>LMC*POEIVDIADKK                                                                                                        | 3                | 8                | 0                | 0                | 0                | 0                | 4                | 3             | 4.078357                                   | 0.798299                                     |
| <b>IPI00134599 40S ribosomal protein S3</b><br>GLC*AIAQAESLR                                                                                                                               | 4                | 7                | 0                | 0                | 3                | 14               | 6                | 56            | 3.622401                                   | 1.0307                                       |
| <b>IPI00134704 Quinone oxidoreductase</b><br>AGESVLVHGASGGVGLATC*QIAR                                                                                                                      | 0                | 0                | 0                | 0                | 4                | 10               | 0                | 0             | 4.497155                                   | 0.819364                                     |
| <b>IPI00134746 Argininosuccinate synthase</b><br>FAELVYTGFWHSPEC*EFVR<br>FELTC*YSLAPOIK<br>GSVVLAYSGLLDTSC*ILVWLK                                                                          | 0<br>0<br>0      | 5<br>6<br>0      | 10<br>6<br>5     | 16<br>5<br>14    | 22<br>14<br>24   | 40<br>19<br>8    | 12<br>6<br>0     | 63<br>46<br>0 | 4.432198<br>3.471591<br>4.197867           | 0.897114<br>1.184135<br>0.783556             |
| <b>IPI00134870 Acyl-coenzyme A oxidase 2, peroxisomal</b><br>LSGLPTLVQAIASC*TYEGENTVLYQVAR                                                                                                 | 0                | 0                | 0                | 0                | 3                | 7                | 0                | 0             | 4.970295                                   | 0.99517                                      |
| <b>IPI00135284 PREDICTED: similar to Glyceraldehyde-3-phosphate dehydrogenase</b><br>VIHDFNGIVE*GLMTTVHAIATQK                                                                              | 3                | 0                | 3                | 0                | 4                | 0                | 0                | 0             | 4.712386                                   | 0.955796                                     |
| <b>IPI00135708 Dual specificity mitogen-activated protein kinase kinase 2</b><br>LC*DFGVSGQLIDSMANSFVGTR                                                                                   | 5                | 0                | 0                | 0                | 6                | 6                | 0                | 0             | 5.185746                                   | 1.301656                                     |
| <b>IPI00136134 Isoform 1 of Protein NDRG2</b><br>YFLQGMGYMASSC*MTR                                                                                                                         | 6                | 7                | 3                | 6                | 0                | 0                | 0                | 2             | 3.952473                                   | 0.913526                                     |
| <b>IPI00137409 Transketolase</b><br>TVPFC*STFAAFFTR                                                                                                                                        | 0                | 1                | 0                | 0                | 4                | 7                | 0                | 0             | 2.762657                                   | 1.169398                                     |
| <b>IPI00137533 6-phosphofructo-2-kinase/fructose-2,6-bisphosphatase 2</b><br>VFFVESVC*DDPDVIAANILEVK                                                                                       | 4                | 10               | 0                | 0                | 2                | 3                | 0                | 0             | 4.767738                                   | 1.004408                                     |
| <b>IPI00137730 Phosphatidylethanolamine-binding protein 1</b><br>YVWLVYEQEPLSC*DEPILSNK                                                                                                    | 3                | 8                | 0                | 0                | 2                | 5                | 0                | 0             | 4.710623                                   | 0.85463                                      |
| <b>IPI00139780 60S ribosomal protein L23</b><br>ISLGLPVGAVINC*ADNTGAK                                                                                                                      | 0                | 5                | 0                | 0                | 1                | 0                | 8                | 8             | 3.742343                                   | 0.993258                                     |
| <b>IPI00153107 Bleomycin hydrolase</b><br>LNSDPQFVLAQNVGTTTHDLLDC*LR                                                                                                                       | 0                | 3                | 0                | 0                | 2                | 2                | 0                | 0             | 3.859689                                   | 0.864447                                     |
| <b>IPI00153144 Adult male liver tumor cDNA, RIKEN full-length enriched library, clone:C730007N17 product:sulfite oxidase, full insert sequence</b><br>VDVSDGGTLTWOEALEGEQEC*PR             | 0                | 0                | 0                | 0                | 0                | 3                | 7                | 0             | 4.57575                                    | 0.796629                                     |
| <b>IPI00153294 Xylulose kinase</b><br>LGSVPVSC*SVVGITISSYYVQR                                                                                                                              | 0                | 0                | 0                | 0                | 7                | 13               | 0                | 0             | 4.555923                                   | 0.782317                                     |
| <b>IPI00153317 10-formyltetrahydrofolate dehydrogenase</b><br>AVQMGMSVFFNKGENC*IAAGR<br>SPLIIFADC*DLNK                                                                                     | 0<br>0           | 0<br>0           | 12<br>4          | 18<br>2          | 7<br>0           | 7<br>0           | 4<br>0           | 6             | 4.580519<br>3.744038                       | 0.990345<br>0.697813                         |
| <b>IPI00153376 Homeodomain-only protein</b><br>HPDPTTLC*LIAEAAGLTEEQTQK<br>VNKHPDPTTLC*LIAEAAGLTEEQTQK                                                                                     | 4<br>9           | 11<br>5          | 0<br>0           | 0<br>0           | 0<br>0           | 0<br>0           | 0<br>0           | 0             | 5.133991<br>5.505117                       | 0.835559<br>1.347146                         |

| PEPTIDE                                                                                                                                                                                          | HEART1 | HEART2 | LIVER1 | LIVER2 | KIDNEY1 | KIDNEY2 | LIVER MEM1 | LIVER MEM2 | XCORR (average) | STD. DEV. |
|--------------------------------------------------------------------------------------------------------------------------------------------------------------------------------------------------|--------|--------|--------|--------|---------|---------|------------|------------|-----------------|-----------|
| <b>IPI00154054</b> Acetyl-CoA acetyltransferase, mitochondrial precursor                                                                                                                         |        |        |        |        |         |         |            |            |                 |           |
| OATLGLAGLPSTPC*TTVVK                                                                                                                                                                             | 5      | 7      | 0      | 0      | 4       | 7       | 0          | 0          | 3.767204        | 0.99578   |
| IHMGNCAENTAK                                                                                                                                                                                     | 2      | 3      | 0      | 0      | 0       | 3       | 0          | 0          | 3.102139        | 1.183412  |
| <b>IPI00169586</b> 16 days embryo head cDNA, RIKEN full-length enriched library, clone:C130036H15 product:Kidney-specific protein homolog                                                        |        |        |        |        |         |         |            |            |                 |           |
| AIVAGDEVAQOEVDVAVPDC*SFLK                                                                                                                                                                        | 0      | 0      | 0      | 0      | 7       | 9       | 0          | 0          | 4.732825        | 0.977003  |
| EYGGTETGLIC*R                                                                                                                                                                                    | 0      | 0      | 0      | 0      | 2       | 2       | 0          | 0          | 2.962225        | 0.899414  |
| <b>IPI00172221</b> Isoform 2 of Dynamin-1-like protein                                                                                                                                           |        |        |        |        |         |         |            |            |                 |           |
| LHDAIVEVVC*LLR                                                                                                                                                                                   | 13     | 6      | 0      | 0      | 6       | 0       | 0          | 0          | 3.540605        | 1.044291  |
| <b>IPI00187462</b> GTPase, IIMAP family member 4 isoform a                                                                                                                                       |        |        |        |        |         |         |            |            |                 |           |
| VFNSGIC*AK                                                                                                                                                                                       | 0      | 0      | 0      | 0      | 3       | 3       | 0          | 0          | 2.796367        | 1.057581  |
| <b>IPI00221400</b> Alcohol dehydrogenase 1                                                                                                                                                       |        |        |        |        |         |         |            |            |                 |           |
| VTPGSTC*AVFGLGGVGLSVIIGCK                                                                                                                                                                        | 0      | 0      | 15     | 18     | 7       | 9       | 0          | 3          | 4.559669        | 1.017366  |
| VCLIGC*GFSTGYGSAVK                                                                                                                                                                               | 0      | 0      | 4      | 2      | 5       | 7       | 0          | 5          | 3.81482         | 0.987705  |
| VIPLFSPOCGEC*R                                                                                                                                                                                   | 0      | 0      | 1      | 5      | 3       | 7       | 2          | 4          | 3.020914        | 1.355322  |
| VIPLFSPOCGEC*R                                                                                                                                                                                   | 0      | 0      | 4      | 1      | 3       | 0       | 6          |            | 2.89947         | 1.512425  |
| SDDHVSGTLVTPPLPAVLGHEGAGIVESVGEVGT                                                                                                                                                               | 0      | 0      | 2      | 1      | 0       | 12      | 0          | 0          | 6.511586        | 1.558183  |
| IDGASPLDKVCLIGC*GFSTGYGSAVK                                                                                                                                                                      | 0      | 0      | 2      | 1      | 0       | 6       | 1          | 3          | 4.541233        | 0.865373  |
| <b>IPI00221402</b> Fructose-bisphosphate aldolase A                                                                                                                                              |        |        |        |        |         |         |            |            |                 |           |
| ALANSLAC*CGK                                                                                                                                                                                     | 3      | 3      | 0      | 0      | 1       | 2       | 0          | 0          | 2.78515         | 1.43399   |
| <b>IPI00221501</b> Adult male medulla oblongata cDNA, RIKEN full-length enriched library, clone:6330583A05 product:SH3BGL2-like protein, full insert sequence                                    |        |        |        |        |         |         |            |            |                 |           |
| VFVASC*SGFVAIK                                                                                                                                                                                   | 0      | 0      | 0      | 0      | 4       | 7       | 0          | 1          | 2.990693        | 1.256207  |
| <b>IPI00221613</b> ADP-ribosylation factor 1                                                                                                                                                     |        |        |        |        |         |         |            |            |                 |           |
| NWYIATC*ATSGDGLYEGLDWLSNQLR                                                                                                                                                                      | 0      | 0      | 0      | 0      | 2       | 5       | 0          | 4          | 5.853337        | 1.509722  |
| AAMLGSGDALGYGNIC*R                                                                                                                                                                               | 14     | 33     | 0      | 0      | 0       | 0       | 0          | 0          | 4.859521        | 0.913457  |
| <b>IPI00221769</b> GTP:AMP phosphotransferase mitochondrial                                                                                                                                      |        |        |        |        |         |         |            |            |                 |           |
| TLTQC*SWLLDGFPR                                                                                                                                                                                  | 16     | 12     | 0      | 0      | 14      | 11      | 0          | 3          | 4.097678        | 0.981405  |
| <b>IPI00221890</b> Carbonic anhydrase 3                                                                                                                                                          |        |        |        |        |         |         |            |            |                 |           |
| EAPFTHFDPSCLFPAC*R                                                                                                                                                                               | 4      | 10     | 22     | 16     | 13      | 16      | 8          | 24         | 3.557952        | 1.154624  |
| GKEAPFTHFDPSCLFPAC*R                                                                                                                                                                             | 1      | 0      | 31     | 63     | 6       | 0       | 0          | 0          | 3.956287        | 0.760291  |
| <b>IPI00222306</b> Adult male testis cDNA, RIKEN full-length enriched library, clone:493341516 product:SERINE/THREONINE PROTEIN PHOSPHATASE 2A, 65 kDa REGULATORY SUBUNIT A, BE                  |        |        |        |        |         |         |            |            |                 |           |
| LNINSLDC*VNEVIGIR                                                                                                                                                                                | 0      | 4      | 0      | 0      | 2       | 0       | 0          | 0          | 3.72635         | 0.701669  |
| <b>IPI00222549</b> 60S ribosomal protein L30                                                                                                                                                     |        |        |        |        |         |         |            |            |                 |           |
| LVLANNP*PALR                                                                                                                                                                                     | 0      | 1      | 0      | 0      | 0       | 0       | 6          | 7          | 3.11086         | 0.963672  |
| <b>IPI00223092</b> Hydroxycyano-Coenzyme A dehydrogenase/3-ketocoyl-Coenzyme A thiolase/enoyl-Coenzyme A hydratase (Trifunctional protein), alpha subunit                                        |        |        |        |        |         |         |            |            |                 |           |
| ALMGLYNGOVLC*K                                                                                                                                                                                   | 4      | 3      | 0      | 0      | 0       | 0       | 0          | 0          | 2.8036          | 1.048122  |
| <b>IPI00224626</b> cell division cycle 10 homolog                                                                                                                                                |        |        |        |        |         |         |            |            |                 |           |
| EGGVQLLTIVDTPGFGDAVDNSNC*WQPVIDYIC                                                                                                                                                               | 0      | 2      | 0      | 0      | 0       | 6       | 0          | 0          | 5.282525        | 0.795201  |
| <b>IPI00225100</b> 12 days embryo embryonic body between diaphragm region and neck cDNA, RIKEN full-length enriched library, clone:9430014L03 product:hypothetical protein, full insert sequ     |        |        |        |        |         |         |            |            |                 |           |
| FSQSLVMAAYSC*QLYPENK                                                                                                                                                                             | 0      | 0      | 0      | 0      | 2       | 7       | 0          | 0          | 4.0675          | 0.700303  |
| <b>IPI00225634</b> Adult male kidney cDNA, RIKEN full-length enriched library, clone:0610039M20 product:ribosomal protein S12, full insert sequence                                              |        |        |        |        |         |         |            |            |                 |           |
| QAHLC*VLASNCDEPMYVK                                                                                                                                                                              | 0      | 0      | 0      | 0      | 0       | 0       | 2          | 12         | 3.826113        | 0.613474  |
| <b>IPI00225961</b> D-3-phosphoglycerate dehydrogenase                                                                                                                                            |        |        |        |        |         |         |            |            |                 |           |
| NAGTC*LSPAVIGLLR                                                                                                                                                                                 | 0      | 0      | 0      | 0      | 4       | 7       | 0          | 0          | 3.814209        | 0.647612  |
| <b>IPI00226218</b> 17 days embryo head cDNA, RIKEN full-length enriched library, clone:3300001H21 product:hypothetical SAM                                                                       |        |        |        |        |         |         |            |            |                 |           |
| LTLLVGC*GTGANFK                                                                                                                                                                                  | 0      | 3      | 0      | 0      | 0       | 0       | 5          | 14         | 3.486325        | 0.902896  |
| <b>IPI00226234</b> Phospholipase A-2-activating protein                                                                                                                                          |        |        |        |        |         |         |            |            |                 |           |
| ILSLIC*NNSSEKPTAQLQLLWK                                                                                                                                                                          | 0      | 1      | 0      | 0      | 2       | 3       | 0          | 0          | 4.397511        | 0.657357  |
| <b>IPI00226521</b> 9130227C08Rik protein                                                                                                                                                         |        |        |        |        |         |         |            |            |                 |           |
| ITWSELSEGLPLC*DVVINLAGENILNPLR                                                                                                                                                                   | 0      | 2      | 0      | 0      | 1       | 6       | 0          | 0          | 5.212933        | 1.012061  |
| <b>IPI00226993</b> Thioredoxin                                                                                                                                                                   |        |        |        |        |         |         |            |            |                 |           |
| LVVVDFSATWCGPC*K                                                                                                                                                                                 | 0      | 2      | 0      | 0      | 0       | 4       | 0          | 0          | 2.945775        | 0.936227  |
| <b>IPI00228106</b> Activated spleen cDNA, RIKEN full-length enriched library, clone:F83021215 product:hypothetical Glycine cleavage T protein (aminomethyl transferase) containing protein, full |        |        |        |        |         |         |            |            |                 |           |
| TLYDVILYGLPEC*TEGASFLLECDSSVLGALOK                                                                                                                                                               | 0      | 7      | 0      | 0      | 1       | 4       | 0          | 0          | 5.257594        | 1.115826  |
| <b>IPI00228253</b> Acetyl-CoA acetyltransferase, cytosolic                                                                                                                                       |        |        |        |        |         |         |            |            |                 |           |
| VAPEEVSEVIFGHVLTAGC*GQNPTR                                                                                                                                                                       | 0      | 1      | 0      | 0      | 7       | 11      | 0          | 0          | 5.329713        | 0.943674  |
| <b>IPI00228630</b> Fructose-1,6-bisphosphatase 1                                                                                                                                                 |        |        |        |        |         |         |            |            |                 |           |
| YVVCDFPLDGSNNIDC*LVSIGTIFGIYR                                                                                                                                                                    | 0      | 0      | 10     | 8      | 13      | 23      | 5          | 5          | 4.953994        | 1.087544  |
| KAQGTGELTQLLNSLC*TAIK                                                                                                                                                                            | 0      | 0      | 0      | 2      | 1       | 7       | 0          | 0          | 4.03134         | 0.699046  |
| <b>IPI00228828</b> 18-day embryo whole body cDNA, RIKEN full-length enriched library, clone:1110048P09 product:guanylate kinase 1, full insert sequence                                          |        |        |        |        |         |         |            |            |                 |           |
| KTDLC*PIVIFVQPPSLDVLEQR                                                                                                                                                                          | 4      | 8      | 0      | 0      | 2       | 0       | 0          | 0          | 4.116138        | 0.71332   |
| <b>IPI00228883</b> PDZ domain-containing protein 1                                                                                                                                               |        |        |        |        |         |         |            |            |                 |           |
| FSPLLYC*QSQELPNQSVK                                                                                                                                                                              | 0      | 0      | 0      | 0      | 2       | 7       | 0          | 0          | 3.781218        | 0.909895  |
| <b>IPI00229080</b> 17 days embryo kidney cDNA, RIKEN full-length enriched library, clone:I920059K05 product:heat shock protein 1, beta, full insert sequence                                     |        |        |        |        |         |         |            |            |                 |           |
| VFIMDSC*DELIPEYLNFR                                                                                                                                                                              | 5      | 11     | 0      | 1      | 2       | 12      | 0          | 3          | 4.108704        | 0.892693  |
| GFEVVMTEPIDEYC*VQQLK                                                                                                                                                                             | 2      | 3      | 0      | 0      | 2       | 3       | 0          | 0          | 3.876642        | 1.039917  |
| <b>IPI00229510</b> L-lactate dehydrogenase B chain                                                                                                                                               |        |        |        |        |         |         |            |            |                 |           |
| ITVVGVGVGMAC*AISILGK                                                                                                                                                                             | 17     | 22     | 0      | 0      | 4       | 2       | 0          | 0          | 3.652919        | 0.995354  |
| GMYGIEVFLSLPC*ILNAR                                                                                                                                                                              | 18     | 8      | 0      | 0      | 3       | 7       | 0          | 0          | 4.454749        | 0.86976   |
| YSPDC*TIIVSNPVDILTYVTWK                                                                                                                                                                          | 19     | 8      | 0      | 0      | 2       | 3       | 0          | 0          | 5.202877        | 1.208543  |
| VIGSGC*NLDSAR                                                                                                                                                                                    | 4      | 3      | 0      | 0      | 4       | 4       | 0          | 0          | 2.767523        | 1.429595  |
| <b>IPI00229517</b> Galactin-1                                                                                                                                                                    |        |        |        |        |         |         |            |            |                 |           |
| FNAHGDANTIVC*NTK                                                                                                                                                                                 | 3      | 2      | 0      | 0      | 0       | 0       | 0          | 0          | 3.5584          | 0.873521  |
| <b>IPI00229859</b> Eif3s9 protein                                                                                                                                                                |        |        |        |        |         |         |            |            |                 |           |
| FSHQGVQLIDFSPC*ER                                                                                                                                                                                | 0      | 5      | 0      | 0      | 3       | 7       | 8          | 7          | 4.07262         | 0.861084  |
| <b>IPI00230139</b> FK506-binding protein 4                                                                                                                                                       |        |        |        |        |         |         |            |            |                 |           |
| ELCFEVGEGESLDLPC*GLEEAIQR                                                                                                                                                                        | 2      | 6      | 0      | 0      | 1       | 4       | 0          | 0          | 4.689315        | 0.887435  |
| <b>IPI00230760</b> Myoglobin                                                                                                                                                                     |        |        |        |        |         |         |            |            |                 |           |
| HGC*TVLTALGTILK                                                                                                                                                                                  | 162    | 137    | 0      | 0      | 16      | 46      | 0          | 0          | 3.467396        | 1.130874  |
| GLSD*GEWQLVNVWGK                                                                                                                                                                                 | 3      | 6      | 0      | 0      | 0       | 0       | 0          | 0          | 3.660475        | 0.551236  |
| VEAD*LAGHGOEVLIGLFLK                                                                                                                                                                             | 6      | 13     | 0      | 0      | 0       | 0       | 0          | 0          | 3.702267        | 0.611366  |
| GLSDGE*WQLVNVWGK                                                                                                                                                                                 | 2      | 3      | 0      | 0      | 0       | 0       | 0          | 0          | 3.554592        | 0.286265  |
| GLS*DGEWQLVNVWGK                                                                                                                                                                                 | 3      | 4      | 0      | 0      | 0       | 0       | 0          | 0          | 3.721029        | 0.493553  |
| HS*GDFGADAGGAMSK                                                                                                                                                                                 | 5      | 12     | 0      | 0      | 0       | 0       | 0          | 0          | 3.340224        | 0.646326  |
| HGCT*VLTALGTILK                                                                                                                                                                                  | 17     | 15     | 0      | 0      | 0       | 0       | 0          | 0          | 3.090091        | 0.723981  |
| VEADLAGH*GOEVLIGLFLK                                                                                                                                                                             | 7      | 14     | 0      | 0      | 0       | 0       | 0          | 0          | 3.870418        | 0.586428  |
| H*GCTVLTALGTILK                                                                                                                                                                                  | 24     | 17     | 0      | 0      | 0       | 0       | 0          | 0          | 3.058635        | 0.680193  |
| H*SGDFGADAGGAMSK                                                                                                                                                                                 | 5      | 13     | 0      | 0      | 0       | 0       | 0          | 0          | 3.691167        | 0.629236  |

| PEPTIDE                                                                                                                                                                               | HEART1 | HEART2 | LIVER1 | LIVER2 | KIDNEY1 | KIDNEY2 | LIVER MEM1 | LIVER MEM2 | XCORR (average) | STD. DEV. |
|---------------------------------------------------------------------------------------------------------------------------------------------------------------------------------------|--------|--------|--------|--------|---------|---------|------------|------------|-----------------|-----------|
| <b>IPI00261627 Succinyl-CoA ligase [ADP-forming] beta-chain, mitochondrial precursor</b>                                                                                              |        |        |        |        |         |         |            |            |                 |           |
| ILAC*DDLDEAAK                                                                                                                                                                         | 2      | 7      | 0      | 0      | 1       | 2       | 0          | 0          | 2.981034        | 1.381119  |
| ICNQLVC*ER                                                                                                                                                                            | 5      | 4      | 0      | 0      | 0       | 2       | 0          | 0          | 3.028048        | 1.139357  |
| <b>IPI00265025 galactokinase 1</b>                                                                                                                                                    |        |        |        |        |         |         |            |            |                 |           |
| AESHFAGVPC*GIMDQLIALLGQK                                                                                                                                                              | 3      | 0      | 0      | 0      | 7       | 8       | 0          | 0          | 4.266074        | 0.79312   |
| <b>IPI00269076 Adenylate kinase isoenzyme 2, mitochondrial</b>                                                                                                                        |        |        |        |        |         |         |            |            |                 |           |
| GIHC*AIDASQTPDIVFASILAFAFSK                                                                                                                                                           | 4      | 0      | 0      | 0      | 6       | 2       | 5          | 0          | 4.88273         | 0.96959   |
| <b>IPI00269481 Capping protein</b>                                                                                                                                                    |        |        |        |        |         |         |            |            |                 |           |
| NLSLDLIDLVPSLC*EDLSSVDQPLK                                                                                                                                                            | 0      | 1      | 0      | 0      | 3       | 12      | 3          | 6          | 4.264932        | 0.807544  |
| <b>IPI00273646 Glyceraldehyde-3-phosphate dehydrogenase</b>                                                                                                                           |        |        |        |        |         |         |            |            |                 |           |
| VPTPNVSVVDLTC*R                                                                                                                                                                       | 32     | 45     | 5      | 4      | 22      | 31      | 0          | 11         | 3.932861        | 0.981726  |
| IVSNASC*TTNCLAPLAK                                                                                                                                                                    | 6      | 7      | 3      | 3      | 5       | 6       | 0          | 4          | 4.079355        | 0.912938  |
| IVSNASC*TTNC*LAPLAK                                                                                                                                                                   | 10     | 9      | 1      | 1      | 3       | 6       | 0          | 1          | 3.195608        | 1.349841  |
| <b>IPI00274407 Isoform 1 of Elongation factor Tu, mitochondrial precursor</b>                                                                                                         |        |        |        |        |         |         |            |            |                 |           |
| ELLTEFGYKGEETPVIVGSALC*ALEQR                                                                                                                                                          | 9      | 9      | 0      | 0      | 6       | 10      | 0          | 0          | 4.68751         | 0.933965  |
| NMITGTAPLDGC*ILVVAANDGMPMPQTR                                                                                                                                                         | 3      | 7      | 0      | 0      | 1       | 0       | 0          | 0          | 4.401365        | 0.72488   |
| GEETPVIVGSALC*ALEQR                                                                                                                                                                   | 2      | 2      | 0      | 0      | 3       | 0       | 0          | 0          | 4.094789        | 0.78675   |
| <b>IPI00283531 Glutathione S-transferase P 2</b>                                                                                                                                      |        |        |        |        |         |         |            |            |                 |           |
| EEVVTIDTWMQGLKPKTC*LYGQLPK                                                                                                                                                            | 17     | 21     | 11     | 7      | 13      | 16      | 6          | 18         | 4.659184        | 0.988177  |
| <b>IPI00307837 Elongation factor 1-alpha 1</b>                                                                                                                                        |        |        |        |        |         |         |            |            |                 |           |
| NMITGTQADAC*AVLIVAAGVGEFEAGISK                                                                                                                                                        | 10     | 7      | 6      | 7      | 14      | 13      | 0          | 3          | 4.210954        | 0.925515  |
| DGSASGTTLLEALDC*ILPPTPTDKPLR                                                                                                                                                          | 2      | 11     | 1      | 0      | 12      | 13      | 10         | 0          | 4.2036          | 0.862557  |
| SGDAIVDMVPGKPMC*VESFSDYPPLGR                                                                                                                                                          | 4      | 6      | 5      | 3      | 5       | 12      | 1          | 6          | 4.079165        | 0.924853  |
| <b>IPI00308328 Cytochrome P450 2F2</b>                                                                                                                                                |        |        |        |        |         |         |            |            |                 |           |
| DFIDC*FLTK                                                                                                                                                                            | 0      | 0      | 0      | 0      | 0       | 0       | 3          | 2          | 2.736258        | 0.970341  |
| <b>IPI00308885 60 kDa heat shock protein, mitochondrial precursor</b>                                                                                                                 |        |        |        |        |         |         |            |            |                 |           |
| AAVEEGLVGGGC*ALLR                                                                                                                                                                     | 31     | 33     | 5      | 5      | 20      | 32      | 3          | 11         | 4.155146        | 0.952683  |
| <b>IPI00308938 Calpain-2 catalytic subunit precursor</b>                                                                                                                              |        |        |        |        |         |         |            |            |                 |           |
| RPTEIC*ADPFIIGGATR                                                                                                                                                                    | 0      | 2      | 0      | 0      | 0       | 4       | 0          | 0          | 4.124863        | 0.911075  |
| <b>IPI00310669 Dihydroxyacetone kinase</b>                                                                                                                                            |        |        |        |        |         |         |            |            |                 |           |
| MVNSVEGC*ADDALAGLVASNPDLQLQGHHR                                                                                                                                                       | 0      | 0      | 3      | 2      | 1       | 3       | 0          | 0          | 6.096788        | 1.430143  |
| <b>IPI00312058 Catalase</b>                                                                                                                                                           |        |        |        |        |         |         |            |            |                 |           |
| LGPNYLQIPVNC*PYR                                                                                                                                                                      | 0      | 7      | 0      | 0      | 4       | 6       | 11         | 20         | 3.765154        | 0.936415  |
| <b>IPI00313236 Bile acyl-CoA synthetase</b>                                                                                                                                           |        |        |        |        |         |         |            |            |                 |           |
| VALVC*TGSESSITNSQLDAR                                                                                                                                                                 | 0      | 0      | 0      | 0      | 0       | 0       | 2          | 7          | 5.184643        | 1.143658  |
| <b>IPI00313296 Ribonuclease inhibitor</b>                                                                                                                                             |        |        |        |        |         |         |            |            |                 |           |
| ELDSLNNC*MGPGVLOLLESLK                                                                                                                                                                | 0      | 2      | 0      | 0      | 1       | 2       | 0          | 0          | 4.7711          | 0.713982  |
| <b>IPI00314189 3 beta-hydroxysteroid dehydrogenase type 5</b>                                                                                                                         |        |        |        |        |         |         |            |            |                 |           |
| LPIFYGEEC*QVSTTVK                                                                                                                                                                     | 0      | 0      | 0      | 0      | 0       | 0       | 2          | 15         | 3.813883        | 0.867682  |
| <b>IPI00314510 Aspartoacylase-2</b>                                                                                                                                                   |        |        |        |        |         |         |            |            |                 |           |
| NGIC*LEMGPQGVLR                                                                                                                                                                       | 0      | 0      | 0      | 0      | 4       | 12      | 0          | 0          | 4.267842        | 0.606117  |
| <b>IPI00314950 60S acidic ribosomal protein P0</b>                                                                                                                                    |        |        |        |        |         |         |            |            |                 |           |
| AGAIAPC*EVTVPAQNTGLGPEK                                                                                                                                                               | 0      | 0      | 0      | 0      | 0       | 0       | 4          | 8          | 4.616881        | 0.767345  |
| <b>IPI00315488 Arginyl-tRNA synthetase, cytoplasmic</b>                                                                                                                               |        |        |        |        |         |         |            |            |                 |           |
| LOEVFGC*AIR                                                                                                                                                                           | 1      | 2      | 0      | 0      | 0       | 5       | 0          | 4          | 2.966269        | 1.26013   |
| <b>IPI00315550 Thioredoxin-like protein 2</b>                                                                                                                                         |        |        |        |        |         |         |            |            |                 |           |
| ELEASEELDTIC*PK                                                                                                                                                                       | 0      | 2      | 0      | 0      | 0       | 2       | 0          | 0          | 2.8534          | 0.804387  |
| <b>IPI00317902 proteasome (prosome, macropain) subunit, beta type 5</b>                                                                                                               |        |        |        |        |         |         |            |            |                 |           |
| VIENPYLLGTMAGGAADC*SFWER                                                                                                                                                              | 3      | 3      | 0      | 0      | 1       | 0       | 0          | 0          | 4.367244        | 0.880207  |
| <b>IPI00318545 3'(2'),5'-bisphosphate nucleotidase 1</b>                                                                                                                              |        |        |        |        |         |         |            |            |                 |           |
| SHSNQLVTDG*ISAMNPDTVLR                                                                                                                                                                | 0      | 0      | 0      | 0      | 4       | 7       | 0          | 0          | 4.375709        | 0.806476  |
| LVQMSIC*SSLAR                                                                                                                                                                         | 0      | 0      | 0      | 0      | 3       | 6       | 0          | 0          | 2.749042        | 0.975066  |
| <b>IPI00318614 Isoform 2 of Isocitrate dehydrogenase [NADP], mitochondrial precursor</b>                                                                                              |        |        |        |        |         |         |            |            |                 |           |
| NYDGDVQSDILAQFGSLGLMTSVLVC*PDGK                                                                                                                                                       | 26     | 33     | 0      | 0      | 4       | 12      | 0          | 0          | 5.981039        | 1.603922  |
| NILGGTVFREPIIC*K                                                                                                                                                                      | 16     | 18     | 0      | 0      | 4       | 7       | 0          | 0          | 3.737878        | 1.064613  |
| DLAGC*IHGLSNVK                                                                                                                                                                        | 5      | 2      | 0      | 0      | 1       | 0       | 0          | 0          | 2.66559         | 1.347613  |
| <b>IPI00318841 Elongation factor 1-gamma</b>                                                                                                                                          |        |        |        |        |         |         |            |            |                 |           |
| VPAFEGDDGFC*VFESNAIYYVSNEELR                                                                                                                                                          | 0      | 18     | 0      | 0      | 5       | 14      | 9          | 0          | 5.104426        | 1.083674  |
| <b>IPI00319652 Glutathione peroxidase 1</b>                                                                                                                                           |        |        |        |        |         |         |            |            |                 |           |
| YIIVSPVC*R                                                                                                                                                                            | 0      | 0      | 0      | 0      | 3       | 7       | 0          | 0          | 2.758298        | 1.028405  |
| <b>IPI00319973 Membrane-associated progesterone receptor component 1</b>                                                                                                              |        |        |        |        |         |         |            |            |                 |           |
| GLATFC*LDKEALKDEYDLSLTPAQOETLSDW                                                                                                                                                      | 0      | 0      | 0      | 0      | 0       | 4       | 0          | 0          | 4.3518          | 0.385024  |
| <b>IPI00319994 L-lactate dehydrogenase A chain</b>                                                                                                                                    |        |        |        |        |         |         |            |            |                 |           |
| ITVVGAVGMAC*AISILMK                                                                                                                                                                   | 10     | 2      | 16     | 19     | 10      | 4       | 0          | 0          | 3.800218        | 1.053955  |
| VIGSGC*NLDSAR                                                                                                                                                                         | 4      | 3      | 1      | 1      | 4       | 4       | 0          | 1          | 2.720413        | 1.659779  |
| IVSSKDYC*VTANSK                                                                                                                                                                       | 3      | 2      | 0      | 0      | 0       | 2       | 0          | 0          | 3.432456        | 0.975638  |
| <b>IPI00320217 T-complex protein 1 subunit beta</b>                                                                                                                                   |        |        |        |        |         |         |            |            |                 |           |
| SLHDALC*VLAQTVK                                                                                                                                                                       | 4      | 3      | 0      | 0      | 0       | 2       | 0          | 0          | 3.148511        | 1.224444  |
| <b>IPI00320850 Methylcrotonoyl-CoA carboxylase subunit alpha, mitochondrial precursor</b>                                                                                             |        |        |        |        |         |         |            |            |                 |           |
| SSAAQAIHPGYGFLSENMEFAELC*K                                                                                                                                                            | 4      | 6      | 0      | 0      | 2       | 5       | 0          | 0          | 4.183145        | 0.818293  |
| <b>IPI00321308 Alanine-tRNA synthetase, cytoplasmic</b>                                                                                                                               |        |        |        |        |         |         |            |            |                 |           |
| NVGC*LQEALGLATSFAQLR                                                                                                                                                                  | 3      | 1      | 0      | 0      | 3       | 0       | 0          | 0          | 4.858378        | 0.942281  |
| <b>IPI00321978 Ran-specific GTPase-activating protein (Fragment)</b>                                                                                                                  |        |        |        |        |         |         |            |            |                 |           |
| AWVWNTHADFADEC*PKPELLAIR                                                                                                                                                              | 5      | 7      | 0      | 0      | 1       | 4       | 0          | 0          | 4.678419        | 0.893248  |
| <b>IPI00322931 Adult male tongue cDNA, RIKEN full-length enriched library, clone:2310022K03 product:peroxisomal delta1a3, delta2-enoyl-Coenzyme A isomerase, full insert sequence</b> |        |        |        |        |         |         |            |            |                 |           |
| ATFHTPFSQLGQSPAC*SSYTFPK                                                                                                                                                              | 9      | 10     | 0      | 0      | 4       | 9       | 2          | 6          | 4.495434        | 0.929837  |
| <b>IPI00323592 Malate dehydrogenase, mitochondrial precursor</b>                                                                                                                      |        |        |        |        |         |         |            |            |                 |           |
| GC*DVVVIPAGVPR                                                                                                                                                                        | 2      | 6      | 0      | 0      | 0       | 0       | 0          | 0          | 3.249142        | 0.875282  |
| GYLQPEQLPDC*LK                                                                                                                                                                        | 3      | 3      | 0      | 0      | 0       | 1       | 0          | 0          | 3.000589        | 1.241485  |
| ETEC*TYFSTPLLLGK                                                                                                                                                                      | 2      | 2      | 0      | 0      | 0       | 0       | 0          | 0          | 2.79655         | 1.085484  |
| <b>IPI00323816 Selenium-binding protein 2</b>                                                                                                                                         |        |        |        |        |         |         |            |            |                 |           |
| GGSVQVLEDOELTC*OPEPLVVK                                                                                                                                                               | 0      | 5      | 0      | 0      | 7       | 28      | 0          | 0          | 4.134383        | 0.734319  |
| FLHDPATOGFVGC*ALSSNIQR                                                                                                                                                                | 0      | 1      | 0      | 0      | 2       | 7       | 0          | 0          | 4.218507        | 0.662488  |
| <b>IPI00323881 Importin beta-1 subunit</b>                                                                                                                                            |        |        |        |        |         |         |            |            |                 |           |
| IQFNDLQSLC*ATLQNVLR                                                                                                                                                                   | 0      | 0      | 0      | 1      | 4       | 7       | 0          | 0          | 3.979769        | 0.677108  |
| <b>IPI00330754 D-beta-hydroxybutyrate dehydrogenase, mitochondrial precursor</b>                                                                                                      |        |        |        |        |         |         |            |            |                 |           |
| METYC*NSGSTDTSSVINAVTHALTAATPYTR                                                                                                                                                      | 0      | 0      | 0      | 0      | 0       | 0       | 4          | 24         | 5.27419         | 1.297388  |
| TIQLNYC*NSBEVEK                                                                                                                                                                       | 0      | 0      | 0      | 0      | 0       | 0       | 2          | 2          | 3.2667          | 0.792733  |
| <b>IPI00330804 Heat shock protein HSP 90-alpha</b>                                                                                                                                    |        |        |        |        |         |         |            |            |                 |           |
| VFIMDNC*EELIPEYLNFR                                                                                                                                                                   | 1      | 0      | 0      | 0      | 2       | 2       | 0          | 0          | 3.876267        | 0.7105    |
| <b>IPI00331066 Calbindin</b>                                                                                                                                                          |        |        |        |        |         |         |            |            |                 |           |
| AFELYDODNGYIDENELDKLDC*EK                                                                                                                                                             | 0      | 0      | 0      | 0      | 2       | 3       | 0          | 0          | 5.292667        | 1.039512  |
| <b>IPI00331094 Aspartoacylase</b>                                                                                                                                                     |        |        |        |        |         |         |            |            |                 |           |
| VIPLGDC*TVYPVFVNEAAYYEK                                                                                                                                                               | 0      | 0      | 0      | 0      | 3       | 6       | 0          | 0          | 4.090667        | 0.655565  |
| <b>IPI00331322 Mitochondrial glutathione S-transferase 1</b>                                                                                                                          |        |        |        |        |         |         |            |            |                 |           |
| VFANPEDC*AGFGK                                                                                                                                                                        | 1      | 3      | 0      | 0      | 0       | 5       | 12         | 30         | 3.093055        | 1.245377  |
| VFANPEDC*AGFGKGENAK                                                                                                                                                                   | 0      | 2      | 0      | 0      | 0       | 0       | 9          | 7          | 3.748428        | 0.82794   |
| ITNKVFANPEDC*AGFGK                                                                                                                                                                    | 0      | 0      | 0      | 0      | 0       | 0       | 10         | 7          | 4.04792         | 0.641619  |
| <b>IPI00331436 Lap3 protein</b>                                                                                                                                                       |        |        |        |        |         |         |            |            |                 |           |
| LNLPINIIGLAPLC*ENMPSPGK                                                                                                                                                               | 0      | 5      | 0      | 0      | 4       | 8       | 5          | 5          | 4.210748        | 0.845621  |
| SAGAC*TAARLR                                                                                                                                                                          | 2      | 0      | 0      | 0      | 3       | 3       | 0          | 0          | 2.825606        | 1.273069  |
| <b>IPI00331490 Aflatoxin B1 aldehyde reductase member 2</b>                                                                                                                           |        |        |        |        |         |         |            |            |                 |           |
| GHSELDTAFMYC*DGQSENILGGLGLGSGDC1                                                                                                                                                      | 0      | 6      | 0      | 0      | 1       | 15      | 0          | 0          | 6.236631        | 1.699934  |
| <b>IPI00331541 6-phosphofructokinase, muscle type</b>                                                                                                                                 |        |        |        |        |         |         |            |            |                 |           |
| LPLMEC*VOVTK                                                                                                                                                                          | 10     | 6      | 0      | 0      | 0       | 2       | 0          | 0          | 2.971776        | 1.239893  |
| SSYLNIVGLVGSINDFNC*GTDMTIGTDSALHR                                                                                                                                                     | 2      | 3      | 0      | 0      | 0       | 0       | 0          | 0          | 4.792875        | 0.717206  |



| PEPTIDE                                                                                                                                                                                          | HEART1 | HEART2 | LIVER1 | LIVER2 | KIDNEY1 | KIDNEY2 | LIVER MEM1 | LIVER MEM2 | XCORR (average) | STD.DEV. |
|--------------------------------------------------------------------------------------------------------------------------------------------------------------------------------------------------|--------|--------|--------|--------|---------|---------|------------|------------|-----------------|----------|
| <b>IPI00337893</b> Pyruvate dehydrogenase E1 component alpha subunit, somatic form, mitochondrial precursor                                                                                      |        |        |        |        |         |         |            |            |                 |          |
| NFYGGNGIVGAQVPLGAGIALAC*K                                                                                                                                                                        | 31     | 35     | 0      | 0      | 6       | 12      | 5          | 9          | 4.52102         | 0.958247 |
| LPCIFIC*ENNR                                                                                                                                                                                     | 20     | 9      | 0      | 0      | 4       | 5       | 0          | 0          | 3.215484        | 1.227028 |
| <b>IPI00338561</b> Nucleotide exchange factor SIL1 precursor                                                                                                                                     |        |        |        |        |         |         |            |            |                 |          |
| D*RYRQDLQLSR                                                                                                                                                                                     | 1      | 1      | 1      | 0      | 0       | 0       | 3          | 2          | 2.729083        | 1.118925 |
| <b>IPI00350458</b> Isoform 1 of UNC45 homolog B                                                                                                                                                  |        |        |        |        |         |         |            |            |                 |          |
| AGVISALAC*MKV                                                                                                                                                                                    | 2      | 2      | 0      | 0      | 0       | 0       | 0          | 0          | 2.7364          | 0.932122 |
| <b>IPI00352124</b> Flavin containing monooxygenase 5                                                                                                                                             |        |        |        |        |         |         |            |            |                 |          |
| LLGPC*TPVQYR                                                                                                                                                                                     | 0      | 1      | 0      | 0      | 0       | 1       | 6          | 8          | 2.614853        | 1.480184 |
| IAVIGAGASGLT*IK                                                                                                                                                                                  | 0      | 0      | 0      | 0      | 0       | 0       | 5          | 7          | 3.973296        | 0.732972 |
| <b>IPI00355265</b> PREDICTED: similar to High mobility group protein 1                                                                                                                           |        |        |        |        |         |         |            |            |                 |          |
| MSSYAFFVQTC*R                                                                                                                                                                                    | 1      | 0      | 0      | 0      | 3       | 2       | 0          | 0          | 2.724189        | 1.198703 |
| <b>IPI00377396</b> 41 kDa protein                                                                                                                                                                |        |        |        |        |         |         |            |            |                 |          |
| VEAILVNIFGGIVNC*AIANGITK                                                                                                                                                                         | 4      | 3      | 2      | 3      | 26      | 26      | 0          | 0          | 4.652554        | 0.958456 |
| IDATQVEVNPFGETPEGOVVC*FDAQ                                                                                                                                                                       | 0      | 3      | 1      | 0      | 3       | 13      | 2          | 0          | 5.598681        | 1.438901 |
| <b>IPI00380320</b> Lactate dehydrogenase D                                                                                                                                                       |        |        |        |        |         |         |            |            |                 |          |
| LHPAPEATVAATC*AFPSVQAAVDSTVOILOAAVP                                                                                                                                                              | 0      | 0      | 0      | 0      | 7       | 4       | 0          | 0          | 6.852189        | 1.8107   |
| DSGLWFPVDPGADASLC*GMAATGASGTNAVR                                                                                                                                                                 | 0      | 0      | 0      | 0      | 3       | 4       | 0          | 0          | 4.0419          | 0.620445 |
| IEFLDDVMMDAC*NR                                                                                                                                                                                  | 0      | 0      | 0      | 0      | 2       | 3       | 0          | 0          | 3.9078          | 0.727091 |
| <b>IPI00403579</b> hypothetical protein LOC232078                                                                                                                                                |        |        |        |        |         |         |            |            |                 |          |
| MGLPIC*LVAVNR                                                                                                                                                                                    | 0      | 0      | 0      | 0      | 11      | 3       | 0          | 0          | 3.080794        | 1.069587 |
| GDFSLC*EVLNR                                                                                                                                                                                     | 0      | 0      | 0      | 0      | 2       | 3       | 0          | 0          | 2.5919          | 1.056849 |
| <b>IPI00403810</b> Tubulin alpha-6 chain                                                                                                                                                         |        |        |        |        |         |         |            |            |                 |          |
| AVC*MLSNTTAIAEAWAR                                                                                                                                                                               | 0      | 0      | 0      | 0      | 20      | 14      | 0          | 0          | 4.367829        | 0.83905  |
| AYHEQLTVAEITNAC*FEPANQMKV                                                                                                                                                                        | 0      | 0      | 0      | 0      | 3       | 12      | 0          | 0          | 5.159413        | 0.890058 |
| LADQC*TLGLOGFLVHFSFGGGTSGFTSLLMER                                                                                                                                                                | 0      | 0      | 0      | 0      | 6       | 6       | 0          | 0          | 5.225492        | 0.933444 |
| TIQFVDWC*PTGFK                                                                                                                                                                                   | 0      | 0      | 0      | 0      | 3       | 8       | 0          | 0          | 3.381308        | 0.751202 |
| <b>IPI00406419</b> Xaa-Pro dipeptidase                                                                                                                                                           |        |        |        |        |         |         |            |            |                 |          |
| IEEDVVVTDGSMELTLC*VPR                                                                                                                                                                            | 0      | 0      | 0      | 0      | 2       | 5       | 0          | 0          | 3.883805        | 0.534416 |
| <b>IPI00406442</b> Succinyl-CoA ligase [GDP-forming] subunit alpha, mitochondrial precursor                                                                                                      |        |        |        |        |         |         |            |            |                 |          |
| LIGPNC*PGVINPGECK                                                                                                                                                                                | 3      | 6      | 0      | 0      | 2       | 5       | 0          | 0          | 3.326828        | 1.062384 |
| LIGPNC*PGVINPGECK                                                                                                                                                                                | 3      | 1      | 0      | 0      | 4       | 0       | 0          | 0          | 3.358886        | 1.104901 |
| <b>IPI00408378</b> Isoform 1 of 14-3-3 protein theta                                                                                                                                             |        |        |        |        |         |         |            |            |                 |          |
| DNLTWTSDSAGEEC*DAEAGAEN                                                                                                                                                                          | 0      | 2      | 0      | 0      | 5       | 16      | 0          | 0          | 4.2548          | 0.670962 |
| YLAEVAC*GDDR                                                                                                                                                                                     | 0      | 2      | 0      | 0      | 2       | 3       | 0          | 0          | 3.012744        | 1.134079 |
| <b>IPI00408961</b> 3-hydroxyanthranilate 3,4-dioxygenase                                                                                                                                         |        |        |        |        |         |         |            |            |                 |          |
| VTMGGQC*IALAPDDSLVPAGTSYVWER                                                                                                                                                                     | 0      | 0      | 0      | 0      | 2       | 5       | 0          | 0          | 4.878725        | 1.118091 |
| <b>IPI00409345</b> Lambda-crystallin homolog                                                                                                                                                     |        |        |        |        |         |         |            |            |                 |          |
| VILSSSSC*LLPSK                                                                                                                                                                                   | 3      | 0      | 0      | 0      | 12      | 12      | 0          | 0          | 3.030617        | 1.0711   |
| <b>IPI00416303</b> Probable aminopeptidase NPEPL1                                                                                                                                                |        |        |        |        |         |         |            |            |                 |          |
| IVDTPC*NEMNTDIFLEEIQVVK                                                                                                                                                                          | 0      | 3      | 1      | 0      | 2       | 8       | 0          | 0          | 4.530199        | 1.086409 |
| <b>IPI00420706</b> Leucine-rich PPR-motif containing                                                                                                                                             |        |        |        |        |         |         |            |            |                 |          |
| VFESTC*SSGSPGNSQALLLLR                                                                                                                                                                           | 4      | 8      | 0      | 0      | 0       | 6       | 1          | 0          | 4.112996        | 0.994706 |
| <b>IPI00420718</b> Hydroxymethylglutaryl-CoA synthase, mitochondrial precursor                                                                                                                   |        |        |        |        |         |         |            |            |                 |          |
| QAGNNQPFLLDDVQYMFHTPFC*K                                                                                                                                                                         | 0      | 0      | 6      | 7      | 0       | 0       | 0          | 7          | 4.040741        | 0.781135 |
| MGFCVQVEDINSLC*LTVVQR                                                                                                                                                                            | 0      | 0      | 3      | 2      | 0       | 0       | 0          | 0          | 4.696525        | 1.008244 |
| <b>IPI00420882</b> 2-oxoglutarate dehydrogenase E1 component, mitochondrial precursor                                                                                                            |        |        |        |        |         |         |            |            |                 |          |
| FQLEGC*EVLIPALK                                                                                                                                                                                  | 2      | 2      | 0      | 0      | 0       | 0       | 0          | 0          | 3.904675        | 0.691661 |
| <b>IPI00421223</b> Tropomyosin alpha-4 chain                                                                                                                                                     |        |        |        |        |         |         |            |            |                 |          |
| EENVGLHQTLDQTLNELNC*1                                                                                                                                                                            | 0      | 0      | 0      | 0      | 2       | 4       | 0          | 0          | 4.323238        | 0.568567 |
| <b>IPI00454008</b> Serine hydroxymethyl transferase 2                                                                                                                                            |        |        |        |        |         |         |            |            |                 |          |
| GLELIAENFC*SR                                                                                                                                                                                    | 0      | 0      | 0      | 0      | 2       | 2       | 0          | 0          | 2.9679          | 1.302816 |
| <b>IPI00454049</b> Enoyl-CoA hydratase, mitochondrial precursor                                                                                                                                  |        |        |        |        |         |         |            |            |                 |          |
| ALNALC*NLIEELNOALETFEQDPAVGAIVLTGGI                                                                                                                                                              | 38     | 61     | 38     | 15     | 21      | 71      | 15         | 44         | 6.033112        | 1.769244 |
| <b>IPI00458204</b> 48 kDa protein                                                                                                                                                                |        |        |        |        |         |         |            |            |                 |          |
| LTTPTYGDLNHLVSATMSGVTTCLR                                                                                                                                                                        | 0      | 10     | 0      | 0      | 0       | 15      | 0          | 0          | 4.586763        | 0.780787 |
| VSDTVPEPYNATLSVHOLVENTDETYC*IDDEALY                                                                                                                                                              | 0      | 2      | 0      | 0      | 0       | 7       | 0          | 0          | 5.323439        | 1.164591 |
| VSDTVPEPYNATLSVHOLVENTDETYCIDDEALY                                                                                                                                                               | 0      | 4      | 0      | 0      | 0       | 0       | 0          | 0          | 5.063538        | 0.783842 |
| <b>IPI00459725</b> Isoform 1 of Isocitrate dehydrogenase [NAD] subunit alpha, mitochondrial precursor                                                                                            |        |        |        |        |         |         |            |            |                 |          |
| TFDLYANVRPC*VSIIEGK                                                                                                                                                                              | 7      | 13     | 0      | 0      | 0       | 3       | 0          | 0          | 3.722203        | 0.873393 |
| KTFDLYANVRPC*VSIIEGK                                                                                                                                                                             | 5      | 11     | 0      | 0      | 0       | 0       | 0          | 0          | 3.899065        | 0.723312 |
| <b>IPI00461964</b> NOD-derived CD11c +ve dendritic cells cDNA, RIKEN full-length enriched library, clone:F630044D15 product:aldehyde dehydrogenase family 6, subfamily A1, full insert sequenc   |        |        |        |        |         |         |            |            |                 |          |
| GYENGFVGPITISNVKPSMTC*YK                                                                                                                                                                         | 10     | 13     | 1      | 0      | 10      | 20      | 0          | 5          | 4.178024        | 0.961432 |
| <b>IPI00466069</b> Elongation factor 2                                                                                                                                                           |        |        |        |        |         |         |            |            |                 |          |
| VTDGALVVVDCVSGVC*VQETVLR                                                                                                                                                                         | 26     | 23     | 29     | 20     | 29      | 25      | 2          | 1          | 4.696303        | 1.022286 |
| <b>IPI00467066</b> Glycine N-methyltransferase                                                                                                                                                   |        |        |        |        |         |         |            |            |                 |          |
| LSYYPHC*LASI*1L1VK                                                                                                                                                                               | 0      | 0      | /      | /      | 0       | 0       | 4          | 11         | 3.863533        | 0.89392  |
| <b>IPI00467833</b> Triosephosphate isomerase                                                                                                                                                     |        |        |        |        |         |         |            |            |                 |          |
| VSHALAEGLGVIAIC*IGEK                                                                                                                                                                             | 4      | 5      | 0      | 0      | 7       | 8       | 0          | 0          | 4.1506          | 0.828419 |
| CLGELIC*TLNANVPAGTEVVCAPPTAYIDFAR                                                                                                                                                                | 1      | 12     | 0      | 1      | 1       | 6       | 0          | 0          | 5.376593        | 1.160109 |
| IIVGSSVTGATC*K                                                                                                                                                                                   | 2      | 1      | 0      | 0      | 2       | 3       | 0          | 0          | 3.057592        | 1.261468 |
| <b>IPI00468162</b> 17 days embryo heart cDNA, RIKEN full-length enriched library, clone:1920020H01 product:protein tyrosine phosphatase, receptor type, f polypeptide (PTPRF), interacting prote |        |        |        |        |         |         |            |            |                 |          |
| K*DLRGQLKMWDSFHRNSFOCGIMCLR                                                                                                                                                                      | 0      | 0      | 10     | 4      | 0       | 0       | 0          | 0          | 3.64681         | 0.391354 |
| KD*LRGQLKMWDSFHRNSFOCGIMCLR                                                                                                                                                                      | 0      | 0      | 12     | 4      | 0       | 0       | 0          | 0          | 3.642608        | 0.511641 |
| <b>IPI00554933</b> Glutathione S-transferase theta-1                                                                                                                                             |        |        |        |        |         |         |            |            |                 |          |
| VLELYDLLSQPC*R                                                                                                                                                                                   | 0      | 0      | 0      | 2      | 5       | 3       | 0          | 0          | 3.559167        | 0.953856 |
| VKDC*PPADLIK                                                                                                                                                                                     | 0      | 0      | 0      | 0      | 2       | 4       | 0          | 0          | 2.7983          | 0.977415 |
| <b>IPI00622235</b> Transitional endoplasmic reticulum ATPase                                                                                                                                     |        |        |        |        |         |         |            |            |                 |          |
| GVLVYGPFGC*GK                                                                                                                                                                                    | 7      | 7      | 0      | 0      | 5       | 6       | 1          | 7          | 2.985151        | 1.447249 |
| <b>IPI00653158</b> 14 days embryo liver cDNA, RIKEN full-length enriched library, clone:1530029G20 product:acetyl-Coenzyme A acyltransferase 2                                                   |        |        |        |        |         |         |            |            |                 |          |
| YAVGSAC*IGGGOGIALIIONTA                                                                                                                                                                          | 24     | 51     | 1      | 4      | 3       | 6       | 0          | 0          | 4.052817        | 0.944295 |
| VVGYFVSGC*DPTIMIGIPVPAINGALKK                                                                                                                                                                    | 27     | 29     | 4      | 7      | 7       | 3       | 0          | 0          | 5.105371        | 1.322215 |
| VVGYFVSGC*DPTIMIGIPVPAINGALK                                                                                                                                                                     | 16     | 27     | 1      | 0      | 5       | 5       | 0          | 0          | 4.992312        | 1.268678 |
| LCGSGFQSIIVSGCQIC*SK                                                                                                                                                                             | 3      | 9      | 0      | 0      | 0       | 0       | 0          | 0          | 4.079294        | 0.620083 |
| <b>IPI00653247</b> 13 days embryo liver cDNA, RIKEN full-length enriched library, clone:1920064F20 product:tubulin, beta 2, full insert sequence                                                 |        |        |        |        |         |         |            |            |                 |          |
| GSESC*CLQGFOLTHSLGGGTGSGMGTLLISK                                                                                                                                                                 | 0      | 2      | 0      | 0      | 0       | 3       | 0          | 0          | 4.1099          | 0.596964 |
| GSE*SCDCLQGFOLTHSLGGGTGSGMGTLLISK                                                                                                                                                                | 0      | 2      | 0      | 0      | 0       | 4       | 0          | 0          | 4.016838        | 0.577036 |
| <b>IPI00658877</b> PREDICTED: similar to F11C1.5a                                                                                                                                                |        |        |        |        |         |         |            |            |                 |          |
| LGHILVDEADKAPTNTVC*ILK                                                                                                                                                                           | 7      | 5      | 0      | 0      | 1       | 4       | 0          | 0          | 4.869755        | 1.082044 |
| <b>IPI00663327</b> Beta-1-globin (Fragment)                                                                                                                                                      |        |        |        |        |         |         |            |            |                 |          |
| YFDSFGDLSSASAIMGNK*VK                                                                                                                                                                            | 0      | 2      | 0      | 0      | 0       | 2       | 0          | 0          | 3.8373          | 0.582371 |
| VH*LTDAEKAASGLWGK                                                                                                                                                                                | 4      | 8      | 0      | 0      | 2       | 3       | 0          | 0          | 3.620659        | 0.875939 |
| GTFASLSLH*CDK                                                                                                                                                                                    | 2      | 4      | 0      | 0      | 0       | 0       | 0          | 0          | 2.785           | 0.674795 |
| <b>IPI00750197</b> PREDICTED: similar to 14-3-3 protein theta                                                                                                                                    |        |        |        |        |         |         |            |            |                 |          |
| DNLTWTSDSAEED*AAEGAEN                                                                                                                                                                            | 0      | 1      | 0      | 0      | 5       | 11      | 0          | 0          | 3.829752        | 0.586134 |
| <b>IPI00754489</b> Bifunctional 3'-phosphoadenosine 5'-phosphosulfate synthetase 2                                                                                                               |        |        |        |        |         |         |            |            |                 |          |
| IHESAGLPFFEIFVDAPLNIC*ESR                                                                                                                                                                        | 0      | 0      | 0      | 0      | 4       | 2       | 0          | 0          | 6.024           | 1.300259 |

**Supplementary Information Table 5:** All labeled peptides with total spectral count values across all sampled tissue proteomes for the SE, CA and MA probes.

| IPI number  | Description                                                  | Peptide                                                                                                                                         | SE                                      | CA                                    | UK                                   |
|-------------|--------------------------------------------------------------|-------------------------------------------------------------------------------------------------------------------------------------------------|-----------------------------------------|---------------------------------------|--------------------------------------|
| IPI00108042 | <b>Carbohydrate kinase-like protein</b>                      | AFFFPVC*FGQDVDAAFGAALVMLQR                                                                                                                      | -                                       | -                                     | 27                                   |
| IPI00108125 | <b>Eukaryotic translation initiation factor 5A-1</b>         | EIEQKYDC*GEEILITVLSAMTEEAVAIK<br>YDC*GEEILITVLSAMTEEAVAIK                                                                                       | -                                       | -                                     | 6<br>91                              |
| IPI00108454 | <b>PREDICTED: similar to 40S ribosomal protein S6</b>        | LNISFPATGC*QK                                                                                                                                   | -                                       | -                                     | 9                                    |
| IPI00108895 | <b>26S protease regulatory subunit 6B</b>                    | GVLMYGPFGC*GK                                                                                                                                   | -                                       | -                                     | 10                                   |
| IPI00108939 | <b>glyceraldehyde-3-phosphate dehydrogenase, sperm</b>       | GKLTGMAFRVPTPNVSVVDLTC*R<br>VPTPNVSVVDLT*CR<br>VPTPNVSVVDLTC*R                                                                                  | -                                       | 8<br>-<br>59                          | -<br>9<br>-                          |
| IPI00109061 | <b>ES cells cDNA, RIKEN full-length enriched library, cl</b> | LTTPPTYGDLNHLVSATMSGVTTC*LR                                                                                                                     | -                                       | 16                                    | 31                                   |
| IPI00109142 | <b>S-formylglutathione hydrolase</b>                         | CPALYVLSGLTC*TEQNFISK<br>SVSAFAPICNPVLC*SWGK                                                                                                    | -                                       | -                                     | 82<br>9                              |
| IPI00109169 | <b>Isocitrate dehydrogenase [NAD] subunit gamma, mit</b>     | HAC*VPVDFEEVHSSNADEEDIR<br>TSLDLYANVIHC*K                                                                                                       | -                                       | -                                     | 22<br>7                              |
| IPI00109501 | <b>Ribosome recycling factor, mitochondrial precursor</b>    | SPQVILVNMASFPEC*TAAAIK                                                                                                                          | -                                       | -                                     | 9                                    |
| IPI00109536 | <b>Aldo-keto reductase family 1, member C21</b>              | CHCVILNDGNFIPVLGFGTALPLEC*PK<br>VDLC*ATWEAMEK                                                                                                   | -                                       | -                                     | 32<br>8                              |
| IPI00109655 | <b>Methionine sulfoxide reductase B2</b>                     | RLDTSLGC*PR                                                                                                                                     | -                                       | -                                     | 14                                   |
| IPI00110042 | <b>Selenium-binding protein 1</b>                            | C*GPGYSTPLEAMK<br>GGSVQVLEDQELTC*QPEPLVVK                                                                                                       | -                                       | 5<br>10                               | -<br>28                              |
| IPI00110528 | <b>Probable isomerase MAWBP-1</b>                            | WFTPEAEFFLC*GHATLASAAVLFQK                                                                                                                      | -                                       | -                                     | 8                                    |
| IPI00110658 | <b>13 days embryo liver cDNA, RIKEN full-length enrich</b>   | IGGH*GAEGAEALER<br>IGGHGAE*YGAEALER<br>IGGHGAEY*GAEALER<br>IGGHGAEYGAE*ALER<br>IGGHGAEYGAEALR                                                   | 74<br>51<br>109<br>108<br>10            | -<br>-<br>-<br>-<br>-                 | 57<br>-<br>-<br>-<br>-               |
| IPI00110753 | <b>Tubulin alpha-1 chain</b>                                 | TYFPHFDVS*HGSQAVK<br>TYFPHFDVSH*GSAQVK<br>AVC*MLSNTTAIAEAWAR<br>AYHEQLSVAEITNAC*FEPANQMVK<br>LADQC*TLGQGLVLFHFSFGGGTSGSFTSLLI<br>TIQFVDWC*PTGFK | -<br>-<br>-<br>-<br>-<br>-              | -<br>-<br>6<br>-<br>-<br>18           | 7<br>7<br>85<br>74<br>19<br>23       |
| IPI00110850 | <b>Actin, cytoplasmic 1</b>                                  | VAPEEH*PVLLTEAPLNPK                                                                                                                             | 5                                       | -                                     | -                                    |
| IPI00110866 | <b>Cytidine deaminase</b>                                    | IFSGCNIENAC*YPLGVCAER                                                                                                                           | -                                       | -                                     | 6                                    |
| IPI00111004 | <b>Uncharacterized protein C7orf24 homolog</b>               | NPSAVFC*CVAR                                                                                                                                    | -                                       | -                                     | 12                                   |
| IPI00111181 | <b>Vacuolar protein sorting-associated protein 35</b>        | IANQC*MDPSLQVQLFIEILNR                                                                                                                          | -                                       | -                                     | 8                                    |
| IPI00111218 | <b>Aldehyde dehydrogenase, mitochondrial precursor</b>       | ELGEYGLQAYTE*VK                                                                                                                                 | 9                                       | -                                     | 6                                    |
| IPI00111315 | <b>Apolipoprotein A-II precursor</b>                         | T*HEQLTPLVR<br>TH*EQLTPLVR                                                                                                                      | -<br>-                                  | -<br>-                                | 6<br>6                               |
| IPI00111412 | <b>60S ribosomal protein L4</b>                              | SGQGAFGNMC*R                                                                                                                                    | -                                       | -                                     | 12                                   |
| IPI00111885 | <b>Ubiquinol-cytochrome-c reductase complex core pro</b>     | YFYDQC*PAVAGYGPQIEQLPDYNR                                                                                                                       | -                                       | -                                     | 7                                    |
| IPI00111908 | <b>Carbamoyl-phosphate synthase [ammonia], mitocho</b>       | QADAVYFLPITPQFVT*EVIK<br>QADAVYFLPITPQFVTE*VIK<br>S*VGEVMAIGR<br>SVGE*VMAIGR<br>TAHIVLE*DGTK<br>TAHIVLED*GTK<br>TSAC*FEPSLDYMVTK<br>VVAVDC*GIK  | 13<br>15<br>6<br>11<br>9<br>9<br>-<br>- | -<br>-<br>-<br>-<br>-<br>-<br>5<br>23 | -<br>-<br>-<br>-<br>-<br>-<br>5<br>- |
| IPI00111981 | <b>Isoform 1 of Putative GTP-binding protein 9</b>           | STFFNVLTNSQASAENFPFC*TIDPNESR                                                                                                                   | -                                       | -                                     | 14                                   |
| IPI00112190 | <b>RIKEN cDNA 1810022C23 gene</b>                            | ATFHTPFSQLSQIPEAC*STYMFPK                                                                                                                       | -                                       | -                                     | 13                                   |
| IPI00112366 | <b>PREDICTED: similar to isochorismatase domain con</b>      | IIKEPVPDSGLLSLFQGSPLTSC*                                                                                                                        | -                                       | -                                     | 24                                   |
| IPI00113223 | <b>Fatty acid synthase</b>                                   | GPSIALDTAC*SSSLLALQNAQAIR                                                                                                                       | -                                       | 75                                    | 28                                   |
| IPI00113347 | <b>Carnitine O-acetyltransferase</b>                         | SMIDNETLPVEFLGGQPLC*MNQYYQILSSC                                                                                                                 | -                                       | -                                     | 15                                   |
| IPI00113377 | <b>60S acidic ribosomal protein P1</b>                       | ALANVNIIGSLIC*NVGAGGPAPAGAAPAGE                                                                                                                 | -                                       | -                                     | 50                                   |
| IPI00114330 | <b>Homogentisate 1,2-dioxygenase</b>                         | TCSG*LDENYYK                                                                                                                                    | -                                       | -                                     | 10                                   |
| IPI00114396 | <b>Isoform Long of Galectin-9</b>                            | GMPFELC*FLVQR                                                                                                                                   | -                                       | -                                     | 12                                   |
| IPI00114416 | <b>3,2-trans-enoyl-CoA isomerase, mitochondrial precu</b>    | GVILT*SECPGIFSAGLDLLEMYGR<br>GVILTS*ECPGIFSAGLDLLEMYGR<br>GVILTSE*CPGIFSAGLDLLEMYGR<br>GVILTSEC*PGIFSAGLDLLEMYGR<br>LRNPPVNSLSLEC*LTEFTISLEK    | -<br>-<br>-<br>-<br>-                   | -<br>-<br>-<br>-<br>-                 | 5<br>5<br>5<br>123<br>25             |

|             |                                                             |                                 |    |     |     |
|-------------|-------------------------------------------------------------|---------------------------------|----|-----|-----|
| IPI00114472 | <b>PREDICTED: similar to ribosomal protein L27a</b>         | NQSFC*PTVNLDKLWTLVSEQTR         | -  | -   | 58  |
| IPI00114710 | <b>Activated spleen cDNA, RIKEN full-length enriched li</b> | FLYEC*PWR                       | -  | 38  | -   |
| IPI00115302 | <b>Branched chain ketoacid dehydrogenase E1, beta po</b>    | SGDLFNC*GSLTIR                  | -  | -   | 7   |
| IPI00115569 | <b>Dihydropolyp dehydrogenase, mitochondrial precurs</b>    | AEVITCDVLLVC*IGR                | -  | -   | 10  |
|             |                                                             | NETLGGTC*LNVCIPSK               | -  | -   | 14  |
|             |                                                             | VLGAHILGPGAGEMVNEAALALEYGASC*ET | -  | -   | 42  |
| IPI00115598 | <b>Isoform Short of Estradiol 17-beta-dehydrogenase 8</b>   | LLEEVCAC*FSRPPSVVSCAGITR        | -  | -   | 9   |
| IPI00115599 | <b>Corticosteroid 11-beta-dehydrogenase isozyme 1</b>       | MTQPMIAPY*SASK                  | 4  | -   | -   |
| IPI00115751 | <b>9.5 days embryo parthenogenote cDNA, RIKEN full-l</b>    | FMTVPVIQDNPSGWGPC*AVPEQFR       | -  | -   | 23  |
| IPI00115827 | <b>Protein NipSnap2</b>                                     | QYPC*TLVGTWNTWYGEQDQAVHLWR      | -  | -   | 16  |
| IPI00116074 | <b>Aconitate hydratase, mitochondrial precursor</b>         | DVGGIVLANAC*GPCIGQWDRK          | -  | -   | 16  |
|             |                                                             | DVGGIVLANACGPC*IGQWDR           | -  | -   | 31  |
|             |                                                             | DVGGIVLANACGPC*IGQWDRK          | -  | -   | 39  |
|             |                                                             | VGLIGSC*TNSSYEDMGR              | -  | 8   | -   |
| IPI00116170 | <b>NADH-ubiquinone oxidoreductase chain 3</b>               | ANPYEC*GFDPTSSAR                | -  | -   | 6   |
| IPI00116192 | <b>Thioredoxin-dependent peroxide reductase, mitoch</b>     | AFQFVETHGEVC*PANWTPESPTIKPSPTAC | -  | -   | 14  |
| IPI00116222 | <b>3-hydroxyisobutyrate dehydrogenase, mitochondrial</b>    | HGYPLILYDVFPDVC*K               | -  | -   | 18  |
| IPI00116277 | <b>T-complex protein 1 subunit delta</b>                    | AQDIEAGDGTTSVVIAGSLLDSC*TK      | -  | -   | 12  |
|             |                                                             | IGLIQFC*LSAPK                   | -  | -   | 28  |
|             |                                                             | SIHDALC*VIR                     | -  | -   | 19  |
| IPI00116489 | <b>Atrial natriuretic factor precursor</b>                  | IGAQSGLGC*NSFR                  | -  | -   | 6   |
| IPI00116591 | <b>Short-chain specific acyl-CoA dehydrogenase, mitoc</b>   | IGIASQALGIAQASLDC*AVK           | -  | 7   | 158 |
| IPI00116613 | <b>CCAAT/enhancer-binding protein beta</b>                  | AAPAAC*FAGPPAAPAK               | -  | -   | 6   |
| IPI00116705 | <b>Fatty acid-binding protein, adipocyte</b>                | LVSSFNFD*DMYK                   | 6  | -   | -   |
| IPI00116753 | <b>Electron transfer flavoprotein subunit alpha, mitoch</b> | TIYAGNALC*TVK                   | -  | -   | 12  |
| IPI00117007 | <b>MKIAA0120 protein (Fragment)</b>                         | QYADLEQILQWITTQC*R              | -  | -   | 6   |
| IPI00117264 | <b>Protein DJ-1</b>                                         | VTVAGLAGKDPVQC*SR               | -  | -   | 14  |
| IPI00117281 | <b>Isoform Mitochondrial of Phospholipid hydroperoxid</b>   | ILAFFC*NQFGR                    | -  | -   | 5   |
| IPI00117312 | <b>Aspartate aminotransferase, mitochondrial precurs</b>    | HFIEQQINVCLC*QSYAK              | -  | -   | 19  |
| IPI00117312 | <b>Aspartate aminotransferase, mitochondrial precurs</b>    | NLDKEYLPIGGLAIEFC*K             | -  | -   | 51  |
| IPI00117348 | <b>Tubulin alpha-2 chain</b>                                | AVC*MLSNTTAAIEAWAR              | -  | 6   | 60  |
|             |                                                             | AYHEQLSVAEITNAC*FEPANQMVK       | -  | -   | 43  |
|             |                                                             | LADQC*TLQGFVLFHFSFGGGTSGGFTSLLI | -  | -   | 19  |
|             |                                                             | SIQFVDWC*PTGFK                  | -  | 29  | 27  |
| IPI00117350 | <b>Tubulin alpha-4 chain</b>                                | AVC*MLSNTTAAIEAWAR              | -  | -   | 81  |
|             |                                                             | AYHEQLSVAEITNAC*FEPANQMVK       | -  | -   | 74  |
|             |                                                             | LSDQC*TLQGFVLFHFSFGGGTSGGFTSLLI | -  | -   | 16  |
|             |                                                             | SIQFVDWC*PTGFK                  | -  | -   | 34  |
|             |                                                             | TIGGGDDSFSTFFC*ETGAGK           | -  | -   | 10  |
| IPI00117569 | <b>40S ribosomal protein S11</b>                            | DVQIGDIVTGC*RPISK               | -  | -   | 12  |
| IPI00117570 | <b>Growth-arrest-specific protein 2</b>                     | LDNGLLC*QLAATVQEK               | -  | -   | 5   |
| IPI00118059 | <b>Serine hydroxymethyltransferase, cytosolic</b>           | LIAGTSC*YSR                     | -  | -   | 5   |
| IPI00118153 | <b>Cysteine and glycine-rich protein 3</b>                  | GIGFGQGAGC*LSTDTGEHLGLQFQQSPK   | -  | 5   | 23  |
|             |                                                             | GIGFGQGAGC*LSTDTGEHLGLQFQQSPK   | -  | -   | 18  |
|             |                                                             | TCFHCMAC*R                      | -  | -   | 5   |
| IPI00118344 | <b>UDP-glucose 6-dehydrogenase</b>                          | ASVGFGGSC*FQK                   | -  | 18  | -   |
|             |                                                             | ISSINSISALC*EATGADVEEVATAIGMDQR | -  | -   | 7   |
| IPI00118676 | <b>Eukaryotic initiation factor 4A-I</b>                    | VVMALGDYMGASCHAC*IGGTNVR        | -  | -   | 5   |
| IPI00118849 | <b>Dual specificity tyrosine-phosphorylation-regulated</b>  | KVYNDGYDDDN*DYIVK               | 24 | -   | -   |
| IPI00118986 | <b>ATP synthase O subunit, mitochondrial precursor</b>      | GEVPC*TVTASPLDDAVLSELK          | -  | -   | 14  |
| IPI00119004 | <b>hypothetical protein LOC67732</b>                        | VILITPPPLC*EAWEK                | -  | -   | 21  |
| IPI00119087 | <b>Uroporphyrinogen-III synthase</b>                        | GLPVSC*TAESPTQALAAGIR           | -  | -   | 13  |
| IPI00119112 | <b>Vacuolar ATP synthase catalytic subunit A, ubiquito</b>  | VLDALFPVCGGTTAIPGAFGC*GK        | -  | -   | 28  |
|             |                                                             | YSNSDVIIVGCG*GER                | -  | 71  | -   |
| IPI00119113 | <b>Bone marrow macrophage cDNA, RIKEN full-length c</b>     | GPVVLAEFDLDMGQPINPQC*R          | -  | -   | 12  |
| IPI00119114 | <b>Long-chain specific acyl-CoA dehydrogenase, mitoc</b>    | GFYYLMQELPQE*R                  | 26 | -   | -   |
| IPI00119219 | <b>Isoform 1 of Estradiol 17-beta-dehydrogenase 12</b>      | AFQVWC*VGNEALVGP                | -  | -   | 20  |
| IPI00119622 | <b>Cysteine sulfinic acid decarboxylase</b>                 | FYDVALDTGDKVVC*GR               | -  | 7   | -   |
| IPI00119667 | <b>Elongation factor 1-alpha 2</b>                          | NMITGTSQADC*AVLVAAGVGEFEAGISK   | -  | -   | 17  |
|             |                                                             | SGDAAIVEMVPGKPMC*VESFSQYPLGR    | -  | -   | 23  |
| IPI00119842 | <b>Short/branched chain specific acyl-CoA dehydrogen</b>    | ASSTC*QLTFENVKVPETNILGK         | -  | -   | 10  |
|             |                                                             | VDAVALLC*DIQNTIINLFR            | -  | -   | 47  |
| IPI00119923 | <b>17 days pregnant adult female amnion cDNA, RIKEN</b>     | QDLSFVTASC*LDEVLNAAFDGGFPVK     | -  | -   | 10  |
| IPI00119930 | <b>5'-AMP-activated protein kinase subunit gamma-1</b>      | EVYLDQSFKPLVC*ISPNASLFDVSSLLIR  | -  | -   | 16  |
| IPI00119945 | <b>Nit protein 2</b>                                        | VGLGIC*YDMR                     | -  | 125 | -   |
| IPI00120076 | <b>Creatine kinase, sarcomeric mitochondrial precursor</b>  | LGYLTC*PSNLGTGLR                | -  | 5   | -   |
|             |                                                             | LGYLTC*PSNLGTGLR                | -  | 79  | 73  |
|             |                                                             | LGYLTC*PSNLGTGLR                | -  | 4   | -   |
|             |                                                             | MTPSGYLDQC*IQTGVNDNPGHPFIK      | -  | -   | 16  |
|             |                                                             | SEVELVQIVDGVNVLVDC*EK           | -  | -   | 28  |
| IPI00120165 | <b>Peroxisomal carnitine O-octanoyltransferase</b>          | AFVFDVLHEGC*LITPELLR            | -  | -   | 10  |
| IPI00120451 | <b>Fatty acid-binding protein, liver</b>                    | AIGLPE*DLIQK                    | 11 | -   | -   |
|             |                                                             | AIGLPE*LIQK                     | 10 | -   | -   |
|             |                                                             | NEFTLGEEC*ELETMTGEK             | 4  | -   | -   |
| IPI00121209 | <b>Apolipoprotein A-I precursor</b>                         | SNPTLNEYH*TR                    | 28 | -   | -   |
|             |                                                             | VAPLGAEL*QESAR                  | 18 | -   | -   |
|             |                                                             | WKED*VELYR                      | 45 | -   | -   |
| IPI00121280 | <b>12 days embryo embryonic body between diaphragm</b>      | KHNLG*GETEER                    | -  | -   | 7   |
| IPI00121348 | <b>L-serine dehydratase</b>                                 | ETLSAKPGAVLVSFGGGGLLC*GVVQGLR   | -  | -   | 13  |
|             |                                                             | LQTPLASLVVIVC*GGSNISLAQLQALK    | -  | -   | 13  |
| IPI00121440 | <b>Electron transfer flavoprotein subunit beta</b>          | EIIAVSCGSPQC*QETIR              | -  | -   | 4   |
|             |                                                             | HSMNPFCE*EIAVEEAVR              | -  | -   | 8   |
|             |                                                             | QAIDDDC*NQTGMQTAGLLDWPQGTAFASQ  | -  | -   | 6   |
| IPI00121566 | <b>GMP reductase 1</b>                                      | VGVGPGSVC*TTR                   | -  | -   | 11  |
| IPI00121639 | <b>Beta-ureidopropionase</b>                                | IAVNIC*YGR                      | -  | 11  | -   |
| IPI00121758 | <b>TAR DNA-binding protein 43</b>                           | VTEDENDEPIEPSDDGTVLLSTVTAQFPG   | -  | -   | 6   |
| IPI00121788 | <b>Peroxisome oxidoreductase</b>                            | HGEVC*PAGWKPGSDTIKPDVVK         | -  | -   | 95  |
|             |                                                             | LNCQVIGASVDSHFC*HLAWINTPK       | -  | -   | 33  |

|             |                                                              |                                  |     |     |     |
|-------------|--------------------------------------------------------------|----------------------------------|-----|-----|-----|
| IPI00121833 | <b>3-ketoacyl-CoA thiolase A, peroxisomal precursor</b>      | AGLTVNDIDIFEINEAFASQAVYC*VEK     | -   | -   | 9   |
| IPI00122075 | <b>Mitochondrial antiviral signaling protein</b>             | FCCVDVLEILPYLSC*LTASDQDR         | -   | -   | 7   |
| IPI00122139 | <b>3-ketoacyl-CoA thiolase B, peroxisomal precursor</b>      | DTPDE*LLSAVLTAFLQDVK             | 14  | -   | -   |
|             |                                                              | DTPDELLS*AVLTAFLQDVK             | 8   | -   | -   |
| IPI00122549 | <b>Isoform PI-VDAC1 of Voltage-dependent anion-select</b>    | WTEYGLTFT*EK                     | 9   | -   | -   |
|             |                                                              | WTEYGLTFTE*K                     | 10  | -   | -   |
| IPI00122634 | <b>Cytochrome P450, family 2, subfamily a, polypeptide</b>   | IQEEAGC*LIK                      | -   | -   | 5   |
|             |                                                              | MLQGTG*GAPIDPTIYLSK              | -   | -   | 9   |
| IPI00122684 | <b>Eno2 protein (Fragment)</b>                               | SGETEDTFIADLVVGLC*TGQIK          | -   | -   | 17  |
| IPI00122740 | <b>Protein LRP16</b>                                         | LEVDAIVNAANSSLLGGGVVDGC*IHR      | -   | -   | 7   |
| IPI00122743 | <b>Aspartyl-tRNA synthetase, cytoplasmic</b>                 | LEYC*EALAMLR                     | -   | -   | 23  |
| IPI00123006 | <b>GDP-mannose pyrophosphorylase A</b>                       | LLPAITLGC*R                      | -   | -   | 16  |
| IPI00123176 | <b>PREDICTED: similar to Glyceraldehyde-3-phosphate</b>      | LISWYDNEY*GYSNR                  | 9   | -   | -   |
| IPI00123619 | <b>Cytochrome P450, family 2, subfamily d, polypeptide</b>   | VQQEIDEVIGVQC*PEMADQAR           | -   | -   | 5   |
| IPI00123651 | <b>ATP-dependent RNA helicase DDX19A</b>                     | VLVTTNVC*AR                      | -   | -   | 10  |
| IPI00123975 | <b>Glycerol kinase-like protein 2</b>                        | GII*GLTQFTNK                     | -   | -   | 11  |
| IPI00124103 | <b>Copper chaperone for superoxide dismutase</b>             | GMGSSQLQNLGAAVAILEGC*GSIQGVVR    | -   | -   | 19  |
| IPI00124225 | <b>Proteasome activator complex subunit 2</b>                | QNLFQEAADDFLC*TFLPR              | -   | -   | 18  |
| IPI00124372 | <b>aldehyde dehydrogenase 9, subfamily A1</b>                | TVC*VEMGDVESAF                   | -   | -   | 6   |
| IPI00124444 | <b>Isoform 1 of 6-phosphofructokinase type C</b>             | WDC*VSSILQVGGTIIGSAR             | -   | -   | 13  |
| IPI00124819 | <b>Coronin-1B</b>                                            | NVLLSAGC*DNVVLWVNGTAEELYR        | -   | -   | 8   |
| IPI00124900 | <b>Isoform 1 of Methylglutaconyl-CoA hydratase, mitoch</b>   | SEVPGIFC*AGADLK                  | -   | -   | 6   |
| IPI00125135 | <b>Ubiquitin-conjugating enzyme E2 D2</b>                    | IYHPNINSNGSIC*LDILR              | -   | -   | 29  |
|             |                                                              | VLLSICSLC*DPNPDDPLVPEIAR         | -   | -   | 18  |
| IPI00125325 | <b>Peroxisomal 2,4-dienoyl-CoA reductase</b>                 | INILINCAAGNFLC*PASALSFNAFK       | -   | -   | 21  |
| IPI00125521 | <b>40S ribosomal protein S5</b>                              | KAQC*PIVER                       | 7   | -   | -   |
|             |                                                              | VNQAIWLLC*TGAR                   | -   | -   | 21  |
| IPI00125853 | <b>Mitochondrial ornithine transporter 1</b>                 | LSDLQNAAGSFASAFALVLC*PTELVK      | -   | -   | 28  |
| IPI00125960 | <b>Protein NDRG1</b>                                         | FALNNPEMVEGLVLMNVNPC*AEGWMDWA    | -   | -   | 8   |
| IPI00126172 | <b>Ester hydrolase C11orf54 homolog</b>                      | AHIMPAEFSSC*PLNSDEAVNK           | -   | -   | 53  |
|             |                                                              | APLVC*LPVFVSK                    | -   | -   | 13  |
| IPI00126208 | <b>11 days embryo whole body cDNA, RIKEN full-length</b>     | AAVS*GLWGKVNADDEVGGEALGR         | -   | -   | 40  |
|             |                                                              | AAVSGLW*GK*VNADEVGGEALGR         | 45  | -   | 29  |
|             |                                                              | AAVSGLW*GKVNAD*EVGGEALGR         | 62  | -   | -   |
|             |                                                              | AAVSGLW*GKVNAD*VGGGEALGR         | 27  | -   | -   |
|             |                                                              | AAVSGLW*GKVNAD*EVGGE*ALGR        | 48  | -   | -   |
|             |                                                              | GTFASLSELH*CDK                   | -   | -   | 6   |
|             |                                                              | GTFASLSELHC*DK                   | 151 | 332 | 100 |
|             |                                                              | GTFASLSELHCD*K                   | -   | -   | 7   |
|             |                                                              | KVITAFNDGLNH*LDSLK               | -   | -   | 8   |
|             |                                                              | VITAFNDGLNH*LDSLK                | 6   | -   | 29  |
|             |                                                              | VITAFNDGLNHLD*SLK                | -   | -   | 5   |
|             |                                                              | VITAFNDGLNHLD*SLK*GTFASLSELHC*DK | 10  | -   | -   |
|             |                                                              | VNAD*EVGGEALGR                   | 179 | -   | -   |
|             |                                                              | VNADE*VGGGEALGR                  | 201 | -   | -   |
|             |                                                              | VNADEVGGE*ALGR                   | 180 | -   | -   |
|             |                                                              | VVAGVAAALAH*K                    | -   | -   | 233 |
|             |                                                              | Y*FDSFGDLSSASAIMGNAK             | 102 | -   | -   |
|             |                                                              | YFD*FSGDLSSASAIMGNAK             | 45  | -   | -   |
|             |                                                              | YFDS*FGDLSSASAIMGNAK             | 78  | -   | -   |
|             |                                                              | YFDSFGD*LSSASAIMGNAK             | 70  | -   | -   |
|             |                                                              | YFDSFGDLSSAS*AIMGNAKVK           | -   | -   | 8   |
|             |                                                              | YFDSFGDLSSASAIMGNAK*VK           | -   | -   | 5   |
| IPI00126248 | <b>Adult male testis cDNA, RIKEN full-length enriched li</b> | YIC*TTSAIQNR                     | -   | -   | 8   |
| IPI00126680 | <b>Adult male kidney cDNA, RIKEN full-length enriched</b>    | GQHMSEQFSQVNC*LNK                | -   | 80  | 37  |
|             |                                                              | GQHMSEQFSQVNC*LNKVPVLK           | -   | -   | 5   |
| IPI00126826 | <b>Histamine N-methyltransferase</b>                         | DDLK*QYVTSDDLQILDDLGIK           | -   | -   | 23  |
| IPI00126940 | <b>Isoform Long of Adenosine kinase</b>                      | TGC*TFPEKPDFH                    | -   | 6   | 12  |
| IPI00127206 | <b>Fructose-bisphosphate aldolase B</b>                      | IADQC*PSSLAIQENANALAR            | -   | -   | 10  |
|             |                                                              | TVPAAVPGIC*FLSGGMSEEDATLNLNAINR  | -   | 31  | -   |
| IPI00127625 | <b>Hydroxymethylglutaryl-CoA lyase, mitochondrial pre</b>    | NANC*SIEESFOR                    | -   | -   | 6   |
| IPI00127707 | <b>Isoform 1 of Poly(rC)-binding protein 2</b>               | INISEGNC*PER                     | -   | -   | 6   |
|             |                                                              | LVPASQC*GSLIGK                   | -   | -   | 9   |
| IPI00127989 | <b>Prostaglandin E synthase 3</b>                            | HLNEIDL*FHC*IDPNDSK              | -   | -   | 14  |
| IPI00128209 | <b>Adenylate kinase isoenzyme 1</b>                          | KVNAEGTVDTVFSEVC*TYLDSLK         | -   | -   | 123 |
|             |                                                              | VNAEGTVDTVFSEVC*TYLDSLK          | -   | -   | 66  |
| IPI00128267 | <b>PREDICTED: similar to 60S ribosomal protein L32</b>       | ELEVLLMC*NK                      | -   | -   | 8   |
| IPI00128376 | <b>Aldo-keto reductase family 1, member C14</b>              | SKDILLVSYC*TLGSSR                | -   | 23  | 38  |
|             |                                                              | SPVLLDDPVLC*AMANK                | -   | -   | 21  |

|             |                                                                        |                                   |     |     |     |
|-------------|------------------------------------------------------------------------|-----------------------------------|-----|-----|-----|
| IP100128518 | <b>S-adenosylmethionine synthetase isoform type-1</b>                  | TGMVLLC*GEITSVAMVDYQR             | -   | -   | 16  |
| IP100128760 | <b>Ubiquitin-conjugating enzyme E2 L3</b>                              | GQVC*LPVISAENWKPATK               | -   | -   | 21  |
| IP100128791 | <b>Heat-shock protein beta-6</b>                                       | FGEGLLEAELASLC*PAAIAPYYLR         | -   | -   | 79  |
| IP100128873 | <b>Nitrilase 1</b>                                                     | THLC*DVEIPGQGPMPR                 | -   | -   | 6   |
|             |                                                                        | VGLAIC*YDMR                       | -   | 20  | -   |
| IP100128904 | <b>Poly(rC)-binding protein 1</b>                                      | GYWASLDASTQTTHELTIPNNLIGC*IIGR    | -   | -   | 16  |
|             |                                                                        | INISEGNC*PER                      | -   | -   | 7   |
|             |                                                                        | LVVPATQC*GSLIGK                   | -   | 6   | 30  |
| IP100129011 | <b>Formimidoyltransferase-cyclodeaminase</b>                           | AC*ALQEGLR                        | -   | 8   | -   |
| IP100129164 | <b>Sepiapterin reductase</b>                                           | SDGALVDC*GTSAQK                   | -   | -   | 6   |
|             |                                                                        | TVVNISLSC*ALQPYK                  | -   | -   | 62  |
| IP100129517 | <b>Isoform Mitochondrial of Peroxiredoxin-5, mitochondrion</b>         | ALNVEPDGTGLTC*SLAPNILSQL          | -   | -   | 25  |
|             |                                                                        | GVLFVGPVGAFTPGC*SK                | -   | -   | 18  |
| IP100129928 | <b>Isoform Mitochondrial of Fumarate hydratase, mitochondrion</b>      | FEALAHDALVELSGAMNTAAC*SLMK        | -   | -   | 15  |
| IP100130000 | <b>Puromycin-sensitive aminopeptidase</b>                              | LPAEVSPINYSLC*LKPDLDDTFEGK        | -   | -   | 19  |
| IP100130173 | <b>Ubiquitin-like 1-activating enzyme E1B</b>                          | VLVVGAGGIGC*ELLK                  | -   | -   | 7   |
| IP100130280 | <b>ATP synthase subunit alpha, mitochondrial precursor</b>             | YTVIVSATASDAAPLQYLAPYSGC*SMGEYF   | -   | 17  | 92  |
| IP100130344 | <b>Chloride intracellular channel protein 1</b>                        | LHIVQVVC*K                        | -   | -   | 7   |
| IP100130521 | <b>Ubiquitin-conjugating enzyme E2 A</b>                               | MFHPNVDYADGSIC*LDILQNR            | -   | -   | 15  |
| IP100130530 | <b>Glyoxylate reductase/hydroxypyruvate reductase</b>                  | VGYPVGLTDATELAVSLLLTC*R           | -   | -   | 23  |
| IP100130804 | <b>Delta3,5-delta2,4-dienoyl-CoA isomerase, mitochondrion</b>          | EVDMLAAD*VGTLQR                   | 755 | -   | -   |
|             |                                                                        | EVDMLAAD*VGTLQRLPK                | 16  | -   | -   |
|             |                                                                        | EVDMLAADVGT*LQR                   | 7   | -   | -   |
| IP100130950 | <b>Betaine--homocysteine S-methyltransferase</b>                       | AGASIVGVNC*HFDPVSVLQTVK           | -   | 9   | -   |
|             |                                                                        | QVADEGDALVAGGVQTPSYLSC*K          | -   | 11  | 35  |
|             |                                                                        | VNEAAC*DIAR                       | -   | 7   | -   |
| IP100131204 | <b>UDP-glucose pyrophosphorylase 2</b>                                 | LNGGLGTSMGC*K                     | -   | -   | 7   |
| IP100131357 | <b>11 days embryo whole body cDNA, RIKEN full-length</b>               | ITAFVFNPDGC*LNFIENDEVLVAGFGR      | -   | -   | 62  |
| IP100131438 | <b>Phosphoenolpyruvate carboxykinase, cytosolic</b>                    | FCTPASQC*PIIDPAWESPEGVPIEGIIIFGGR | -   | 9   | -   |
|             |                                                                        | YLAFAFSPAC*GK                     | -   | 22  | 11  |
| IP100131478 | <b>Arylsulfotransferase ST1A4</b>                                      | IPFLEFSC*PGVPPGLETLK              | -   | -   | 14  |
| IP100131695 | <b>Serum albumin precursor</b>                                         | AH*CLSEVEHDTMPADLPAIAADFVEDQEV    | -   | -   | 10  |
|             |                                                                        | AHCLS*EVEHDTMPADLPAIAADFVEDQEV    | -   | -   | 10  |
|             |                                                                        | AHCLSEVEHDTMPADLPAIAADFVEDQEV     | -   | -   | 10  |
|             |                                                                        | AHCLSEVEHDT*MPADLPAIAADFVEDQEV    | -   | -   | 10  |
|             |                                                                        | C*SYDEHAK                         | -   | 22  | -   |
| IP100132042 | <b>Pyruvate dehydrogenase E1 component subunit beta</b>                | TNHLVTVEGGWPQFVGAEIC*AR           | -   | -   | 106 |
| IP100132076 | <b>Isoform Membrane-bound of Catechol O-methyltransferase</b>          | EYRPSLVLELGAYC*GYS AVR            | -   | -   | 155 |
| IP100132080 | <b>6-phosphogluconolactonase</b>                                       | TGALC*WFLDEAAAR                   | -   | -   | 9   |
| IP100132347 | <b>Adult male cerebellum cDNA, RIKEN full-length</b>                   | DDTLHE*TEDVK                      | 6   | -   | -   |
| IP100132388 | <b>Basic leucine zipper and W2 domain-containing protein</b>           | FDPTQFQDC*IIQGLTETGTDLEAVAK       | -   | -   | 59  |
| IP100132653 | <b>Succinyl-CoA:3-ketoacid-coenzyme A transferase 1, mitochondrial</b> | DIPNGATLLVGGFGLC*GIPENLIGALLK     | -   | 23  | 38  |
| IP100132958 | <b>Thioesterase superfamily member 2</b>                               | LGTLHGLTATLVDISITMALMC*TER        | -   | -   | 86  |
| IP100133006 | <b>Acyl carrier protein, mitochondrial precursor</b>                   | LMC*PQEIYVDIADKK                  | -   | -   | 18  |
| IP100133034 | <b>Histidine triad nucleotide-binding protein 2</b>                    | IS*QAEEDDQQLLGHLLLVAK             | 11  | -   | -   |
|             |                                                                        | ISQAE*DDQQLLGHLLLVAK              | 13  | -   | -   |
|             |                                                                        | ISQAEEDD*QQLLGHLLLVAK             | 15  | -   | -   |
| IP100133456 | <b>Regucalcin</b>                                                      | VAVD*APVSSVALR                    | 17  | -   | -   |
| IP100133903 | <b>Stress-70 protein, mitochondrial precursor</b>                      | AKC*ELSSSVQTDINLPYLTMDSAGPK       | -   | 9   | -   |
|             |                                                                        | C*ELSSSVQTDINLPYLTMDSAGPK         | -   | 13  | -   |
| IP100133920 | <b>SEC13-related protein</b>                                           | FASGGC*DNLK                       | -   | 11  | -   |
| IP100134599 | <b>40S ribosomal protein S3</b>                                        | GLC*AIAQAESLR                     | -   | 59  | 90  |
| IP100134704 | <b>Quinone oxidoreductase</b>                                          | AGESVLVHGASGGVGLATC*QIAR          | -   | -   | 14  |
| IP100134746 | <b>Argininosuccinate synthase</b>                                      | EFVEEFIWPAVQSSALY*EDR             | 11  | -   | -   |
|             |                                                                        | EFVEEFIWPAVQSSALYE*DR             | 6   | -   | -   |
|             |                                                                        | EFVEEFIWPAVQSSALYED*R             | 7   | -   | -   |
|             |                                                                        | FAELVYTGFWHSPEC*EFVR              | -   | -   | 168 |
|             |                                                                        | FELTC*YSLAPQIK                    | -   | 45  | 102 |
|             |                                                                        | GSVVLAYSGLDTS*ILVWLK              | -   | -   | 51  |
| IP100134870 | <b>Acyl-coenzyme A oxidase 2, peroxisomal</b>                          | LSGLPTLVQAIASC*TYEGENTVLYLQVAR    | -   | -   | 10  |
| IP100134961 | <b>Medium-chain specific acyl-CoA dehydrogenase, mitochondrial</b>     | AFAGDIANQLAT*DAVQIFGGYGFNTEYPVE   | 11  | -   | -   |
|             |                                                                        | AFAGDIANQLATDAVQIFGGYGFNT*EYPVE   | 6   | -   | -   |
|             |                                                                        | IYQIY*EGTAQIQR                    | 10  | -   | -   |
|             |                                                                        | IYQIYE*GTAQIQR                    | 13  | -   | -   |
| IP100135231 | <b>0 day neonate lung cDNA, RIKEN full-length</b>                      | SEGGFIVAC*K                       | -   | 10  | -   |
| IP100135284 | <b>PREDICTED: similar to Glyceraldehyde-3-phosphate dehydrogenase</b>  | VIHDFNGIVE*GLMTTVHAITATQK         | -   | -   | 10  |
| IP100135708 | <b>Dual specificity mitogen-activated protein kinase kinase 1</b>      | LC*DFGVSGQLIDSMANSFVGTR           | -   | -   | 17  |
| IP100135977 | <b>Chloride intracellular channel protein 4</b>                        | AGSDGESIGNC*PFSQR                 | -   | 74  | -   |
| IP100136134 | <b>Isoform 1 of Protein NDRG2</b>                                      | YFLOGMGYMASSC*MTR                 | -   | -   | 24  |
| IP100137091 | <b>Osteoclast-like cell cDNA, RIKEN full-length</b>                    | HRRRPS*KRKR                       | -   | -   | 12  |
| IP100137409 | <b>Transketolase</b>                                                   | TVPFC*STFAAFFTR                   | -   | -   | 12  |
| IP100137533 | <b>6-phosphofructo-2-kinase/fructose-2,6-bisphosphatase</b>            | VFFVESVC*DDPDVIAANILEVK           | -   | -   | 19  |
| IP100137730 | <b>Phosphatidylethanolamine-binding protein 1</b>                      | YVWLVEEQEQLSC*DEPILSNK            | -   | -   | 18  |
| IP100139780 | <b>60S ribosomal protein L23</b>                                       | ISLGLPVGAVINC*ADNTGAK             | -   | -   | 22  |
| IP100153107 | <b>Bleomycin hydrolase</b>                                             | LNSDPQVFLAQNVTGTHDLLDIC*LR        | -   | -   | 7   |
| IP100153144 | <b>Adult male liver tumor cDNA, RIKEN full-length</b>                  | VDVSVDDGGLTWQEAEEGEEQC*PR         | -   | -   | 10  |
| IP100153294 | <b>Xylulose kinase</b>                                                 | LGSPVPSC*SVVGTISSYYVQR            | -   | -   | 20  |
| IP100153317 | <b>10-formyltetrahydrofolate dehydrogenase</b>                         | AVQMGMSVFFNKGENC*IAAGR            | -   | 340 | 54  |
|             |                                                                        | SPLIIFADC*DLNK                    | -   | -   | 6   |
| IP100153376 | <b>Homeodomain-only protein</b>                                        | HPDPTTLC*LIAAEAGLTEEQTQK          | -   | -   | 15  |
|             |                                                                        | VNKHPDPTTLC*LIAAEAGLTEEQTQK       | -   | -   | 14  |
| IP100153463 | <b>Dehydrogenase/reductase SDR family member 11 protein</b>            | NIDDGHIININSMC*GHR                | -   | 37  | -   |
| IP100154054 | <b>Acetyl-CoA acetyltransferase, mitochondrial precursor</b>           | IHMGNIC*AENTAK                    | -   | -   | 8   |
|             |                                                                        | QATLGAGLPSTPC*TTVVK               | -   | -   | 23  |
| IP100169586 | <b>16 days embryo head cDNA, RIKEN full-length</b>                     | AIVAGDEVAQEVDVAVPDC*SFLK          | -   | -   | 16  |
|             |                                                                        | EIYGQTETGLIC*R                    | -   | -   | 4   |

|             |                                                       |                                   |    |    |     |
|-------------|-------------------------------------------------------|-----------------------------------|----|----|-----|
| IPI00169862 | Ubiquinone biosynthesis protein COQ9, mitochondri     | AVLAGIY*NTTELVMQDSSPDFEDTWR       | 9  | -  | -   |
|             |                                                       | AVLAGIYNTTE*LVMMQDSSPDFEDTWR      | 9  | -  | -   |
|             |                                                       | AVLAGIYNTTELVMQD*SPPDFEDTWR       | 7  | -  | -   |
| IPI00172221 | Isoform 2 of Dynamin-1-like protein                   | IC*YFHETFGFR                      | -  | 7  | -   |
|             |                                                       | LHDAIVEVVTC*LLR                   | -  | -  | 25  |
| IPI00187462 | GTPase, IMAP family member 4 isoform a                | VFNSGIC*AK                        | -  | -  | 6   |
| IPI00221400 | Alcohol dehydrogenase 1                               | IDGASPLDKVCLIGC*GFSTGYGSAVK       | -  | -  | 13  |
|             |                                                       | MVATGVC*R                         | -  | 14 | -   |
|             |                                                       | SDDHVVSGLTLPPLPAVLGHEGAGIVESVGI   | -  | -  | 15  |
|             |                                                       | VCLIGC*GFSTGYGSAVK                | -  | -  | 23  |
|             |                                                       | VIPLFSPQC*GECR                    | -  | -  | 18  |
|             |                                                       | VIPLFSPQGC*ER                     | -  | -  | 22  |
|             |                                                       | VTPGSTC*AVFGLGGVGLSVIIGCK         | -  | -  | 52  |
| IPI00221402 | Fructose-bisphosphate aldolase A                      | ALANSLAC*QGK                      | -  | -  | 9   |
| IPI00221501 | Adult male medulla oblongata cDNA, RIKEN full-leng    | VFVASC*SGFVAIK                    | -  | -  | 12  |
| IPI00221613 | ADP-ribosylation factor 1                             | NWYIQATC*ATSGDGLYEGLDWLSNQLR      | -  | -  | 11  |
| IPI00221629 | ADP-ribosylhydrolase                                  | AAMLLGSVDALGYGNIC*R               | -  | -  | 47  |
| IPI00221636 | Adult male aorta and vein cDNA, RIKEN full-length e   | MISQSC*LSNIEK                     | -  | 7  | -   |
| IPI00221769 | GTP:AMP phosphotransferase mitochondrial              | TLTQC*SWLLDGFPR                   | -  | -  | 56  |
| IPI00221890 | Carbonic anhydrase 3                                  | EAPFTHFDPSCLFPAC*R                | -  | -  | 113 |
|             |                                                       | GKEAPFTHFDPSCLFPAC*R              | -  | -  | 101 |
| IPI00222306 | Adult male testis cDNA, RIKEN full-length enriched li | LNHISNLDC*VNEVIGIR                | -  | -  | 6   |
| IPI00222549 | 60S ribosomal protein L30                             | LVLANNP*PALR                      | -  | -  | 14  |
| IPI00223092 | Hydroxyacyl-Coenzyme A dehydrogenase/3-ketoacyl       | ALMGLYNGQVLC*K                    | -  | -  | 7   |
| IPI00224626 | cell division cycle 10 homolog                        | EGGVQLLITVIDTPGFGDAVDNSNC*WQPV    | -  | -  | 8   |
| IPI00225100 | 12 days embryo embryonic body between diaphragm       | FSQSLVMAAYSC*QLYPENK              | -  | -  | 9   |
| IPI00225634 | Adult male kidney cDNA, RIKEN full-length enriched    | QAHLN*VLASNCDEPMYVK               | -  | -  | 14  |
| IPI00225961 | D-3-phosphoglycerate dehydrogenase                    | NAGTC*LSPAVIVGLLR                 | -  | -  | 11  |
| IPI00226218 | 17 days embryo head cDNA, RIKEN full-length enrich    | LTLLEVGC*GTGANFK                  | -  | -  | 22  |
| IPI00226234 | Phospholipase A-2-activating protein                  | ILSLIC*NNSSEKPTAQQQLQILWK         | -  | -  | 6   |
| IPI00226521 | 9130227C08Rik protein                                 | ITWSELSESGPLPC*DVVINLAGENILNPLR   | -  | -  | 9   |
| IPI00226993 | Thioredoxin                                           | C*MPTFQFYK                        | -  | 10 | -   |
|             |                                                       | LVVDFSATWCGPC*K                   | -  | -  | 6   |
| IPI00228106 | Activated spleen cDNA, RIKEN full-length enriched li  | TLVDVILYGLPEC*TEGAPSFLLCEDSSVVLGA | -  | -  | 12  |
| IPI00228253 | Acetyl-CoA acetyltransferase, cytosolic               | VAPEEVSEVIFGHVLTAGC*GQNPNTR       | -  | -  | 19  |
| IPI00228630 | Fructose-1,6-bisphosphatase 1                         | DFD*PAINEYLQR                     | 5  | -  | -   |
|             |                                                       | KAQGTGELTQLLNSLC*TAIK             | -  | -  | 10  |
|             |                                                       | YVCFDPLDGSSNIDC*LVSIGTIFGIYR      | -  | -  | 64  |
| IPI00228828 | 18-day embryo whole body cDNA, RIKEN full-length      | KTDLN*PIYIVQPPSLDVLEQR            | -  | -  | 14  |
| IPI00228883 | PDZ domain-containing protein 1                       | FSPLLYC*QSQELPNGSVK               | -  | -  | 9   |
| IPI00229080 | 17 days embryo kidney cDNA, RIKEN full-length enri    | GFEVVMTEPIDEYCVQQLK               | -  | -  | 10  |
|             |                                                       | VFIMDSC*DELIPEYLNFR               | -  | -  | 34  |
| IPI00229510 | L-lactate dehydrogenase B chain                       | GMYGIEVFLSLPC*ILNAR               | -  | 16 | 36  |
|             |                                                       | ITVVGVGQVGMAC*AISILGK             | -  | -  | 45  |
|             |                                                       | VIGSGC*NLDSAR                     | -  | 43 | 15  |
|             |                                                       | YSPDC*TIIVVSNPVDILTYVTWK          | -  | -  | 32  |
| IPI00229517 | Galectin-1                                            | FNAHGDANTIVC*NTK                  | -  | -  | 5   |
| IPI00229859 | Eif3s9 protein                                        | FSHQGVQLIDFSPC*ER                 | -  | -  | 30  |
| IPI00230034 | D-dopachrome decarboxylase                            | PFVE*LETNLPSAR                    | -  | -  | 46  |
| IPI00230139 | FK506-binding protein 4                               | ELCFEVEGEGESLDLPC*GLEEAIQR        | -  | -  | 13  |
| IPI00230212 | Glutathione S-transferase Mu 1                        | C*LDAFPNLR                        | -  | 9  | -   |
|             |                                                       | YTMGD*APDFDR                      | 7  | -  | -   |
| IPI00230706 | Phosphoglycerate mutase 2                             | FC*GWFDAELSEK                     | -  | 39 | -   |
| IPI00230760 | Myoglobin                                             | GLS*DGWQLVNLVWVK                  | -  | -  | 7   |
|             |                                                       | GLSD*GEWQLVNLVWVK                 | -  | -  | 9   |
|             |                                                       | GLSDGE*WQLVNLVWVK                 | -  | -  | 5   |
|             |                                                       | H*GCTVLTALGTILK                   | -  | -  | 41  |
|             |                                                       | H*SGDFGADAQGAMSK                  | -  | -  | 18  |
|             |                                                       | HGC*TVLTALGTILK                   | -  | 43 | 361 |
|             |                                                       | HGCT*VLTALGTILK                   | -  | -  | 32  |
|             |                                                       | HS*GDFGADAQGAMSK                  | -  | -  | 17  |
|             |                                                       | VEAD*LAGHGQEVLIQLFK               | -  | -  | 19  |
|             |                                                       | VEADLAGH*GQEVLIQLFK               | -  | -  | 21  |
| IPI00261627 | Succinyl-CoA ligase [ADP-forming] beta-chain, mitoc   | ICNQVLVC*ER                       | -  | -  | 11  |
|             |                                                       | ILAC*DDLDEAAK                     | -  | -  | 12  |
| IPI00265025 | galactokinase 1                                       | AEHSFAGVPC*GIMDQLIALLGQK          | -  | -  | 18  |
| IPI00266614 | Ribosylidihyronicotinamide dehydrogenase              | VLAPQISFGLD*VSSEER                | 20 | -  | -   |
| IPI00267407 | Aldh8a1 protein                                       | SSFANQGEIC*LCTSR                  | -  | 13 | -   |
| IPI00269076 | Adenylate kinase isoenzyme 2, mitochondrial           | GIHC*AIDASQTPDIVFASILAAFSK        | -  | -  | 17  |
| IPI00269481 | Capping protein                                       | NLSDLIDLVPSLC*EDLLSSVDQPLK        | -  | -  | 25  |
| IPI00271869 | PREDICTED: similar to Glyceraldehyde-3-phosphate      | WGEAGAEEYVVE*STGVFTTMEK           | 6  | -  | -   |
| IPI00273164 | Succinate semialdehyde dehydrogenase, mitochond       | NAGQTC*VCSNR                      | -  | -  | 19  |
| IPI00273646 | Glyceraldehyde-3-phosphate dehydrogenase              | IVSNASC*TTNCLAPLAK                | -  | 37 | 34  |
|             |                                                       | IVSNASC*TTNCLAPLAK                | -  | -  | 31  |
|             |                                                       | VTPNVSVVDLTC*R                    | -  | 75 | 150 |

|             |                                                                     |                                   |    |    |     |
|-------------|---------------------------------------------------------------------|-----------------------------------|----|----|-----|
| IPI00274407 | <b>Isoform 1 of Elongation factor Tu, mitochondrial precursor</b>   | ELLTEFGYKGEETPVIVGSALC*ALEQR      | -  | -  | 34  |
|             |                                                                     | GEETPVIVGSALC*ALEQR               | -  | -  | 7   |
|             |                                                                     | NMITGTAPLDGC*ILVVAANDGMPQTR       | -  | -  | 11  |
| IPI00283531 | <b>Glutathione S-transferase P 2</b>                                | EEVVTIDTWMQGLLKPTC*LYGQLPK        | -  | 28 | 109 |
|             |                                                                     | FE*DGDLTYQSNAILR                  | 16 | -  | -   |
|             |                                                                     | FED*GDLTYQSNAILR                  | 10 | -  | -   |
| IPI00307837 | <b>Elongation factor 1-alpha 1</b>                                  | DGSASGTTLLEALDC*ILPPTRPTDKPLR     | -  | -  | 49  |
|             |                                                                     | NMITGTSQADC*AVLIVAAGVGEFEAGISK    | -  | -  | 60  |
|             |                                                                     | SGDAAIVDMVPGKPMC*VESFSDYPLGR      | -  | 20 | 42  |
| IPI00308328 | <b>Cytochrome P450 2F2</b>                                          | DFIDC*FLTK                        | -  | -  | 5   |
| IPI00308885 | <b>60 kDa heat shock protein, mitochondrial precursor</b>           | AAVEEGVLGGGC*ALLR                 | 80 | 64 | 140 |
|             |                                                                     | C*EFQDAYVLLSEK                    | -  | 9  | -   |
|             |                                                                     | ILQSSSEVGYDAMLGDFVNMVE*K          | 6  | -  | -   |
|             |                                                                     | NAGVEGSLIVE*K                     | 9  | -  | -   |
| IPI00308938 | <b>Calpain-2 catalytic subunit precursor</b>                        | RPTEIC*ADPQFIIGGATR               | -  | -  | 6   |
| IPI00309073 | <b>Microsomal triglyceride transfer protein large subunit</b>       | SGSSSAYTGYVE*TR                   | 7  | -  | -   |
| IPI00310669 | <b>Dihydroxyacetone kinase</b>                                      | MVNSVEGC*ADDALAGLVASNPDLQLLQGH    | -  | -  | 9   |
| IPI00312058 | <b>Catalase</b>                                                     | LGPNYLQIPVNC*PYR                  | -  | -  | 48  |
| IPI00313236 | <b>Bile acyl-CoA synthetase</b>                                     | VALVC*TGSEGSITNSQLDAR             | -  | -  | 9   |
| IPI00313296 | <b>Ribonuclease inhibitor</b>                                       | ELDLSNNC*MGPGVQLLESK              | -  | -  | 5   |
| IPI00314041 | <b>Villin-1</b>                                                     | HVETNSC*DVQR                      | -  | 4  | -   |
| IPI00314189 | <b>3 beta-hydroxysteroid dehydrogenase type 5</b>                   | LPFIYGEEC*QVTSTTVK                | -  | -  | 17  |
| IPI00314510 | <b>Aspartoacylase-2</b>                                             | LFGGEDVLYEGDSIVYPFINE*AAYYEK      | 6  | -  | -   |
|             |                                                                     | NGIC*LEMGPQPQGVLR                 | -  | -  | 16  |
| IPI00314950 | <b>60S acidic ribosomal protein P0</b>                              | AGAIAPC*EVTVPAQNTGLGPEK           | -  | -  | 12  |
| IPI00315488 | <b>Arginyl-tRNA synthetase, cytoplasmic</b>                         | LQEVFGC*AIR                       | -  | -  | 12  |
| IPI00315550 | <b>Thioredoxin-like protein 2</b>                                   | ELEASEELDTIC*PK                   | -  | -  | 4   |
| IPI00317902 | <b>proteasome (prosome, macropain) subunit, beta type 1</b>         | VIENPYLLGTMAGGAADC*SFWER          | -  | -  | 7   |
| IPI00318545 | <b>3'(2'),5'-bisphosphate nucleotidase 1</b>                        | LVQMSIC*SSLAR                     | -  | -  | 9   |
|             |                                                                     | SHSNQLVTDC*ISAMNPDTVLR            | -  | -  | 11  |
| IPI00318614 | <b>Isoform 2 of Isocitrate dehydrogenase [NADP], mitochondrial</b>  | DLAGC*IHGLSNVK                    | -  | -  | 8   |
|             |                                                                     | NILGGTVFREPIIC*K                  | -  | -  | 45  |
|             |                                                                     | NYDGDVQSDILAQQFGSLGLMTSVLVC*PDI   | -  | -  | 75  |
| IPI00318841 | <b>Elongation factor 1-gamma</b>                                    | VPAFEGDDGFC*VFESNAIYYVSNEELR      | -  | -  | 46  |
| IPI00319652 | <b>Glutathione peroxidase 1</b>                                     | YIIWSPVC*R                        | -  | -  | 10  |
| IPI00319973 | <b>Membrane-associated progesterone receptor component 1</b>        | FYGPPEGPY*GVFAGR                  | 5  | -  | -   |
| IPI00319994 | <b>L-lactate dehydrogenase A chain</b>                              | DYC*VTANSK                        | -  | 9  | -   |
|             |                                                                     | ITVVGVGAVGMAC*AISILMK             | -  | -  | 61  |
|             |                                                                     | IVSSKDYC*VTANSK                   | -  | -  | 7   |
|             |                                                                     | VIGSGC*NLDSAR                     | -  | 38 | 18  |
| IPI00320217 | <b>T-complex protein 1 subunit beta</b>                             | SLHDALC*VLAQTVK                   | -  | -  | 9   |
| IPI00320850 | <b>Methylcrotonoyl-CoA carboxylase subunit alpha, mitochondrial</b> | SSAAQAIHPGYGFLSENMEFAELC*K        | -  | -  | 17  |
| IPI00321308 | <b>Alanyl-tRNA synthetase, cytoplasmic</b>                          | NVGC*LOEALQLATSAFQLR              | -  | -  | 7   |
| IPI00321375 | <b>12 days embryo female mullerian duct includes surrogates</b>     | GVVFCT*FDILFFDPAVR                | -  | 12 | -   |
| IPI00321978 | <b>Ran-specific GTPase-activating protein (Fragment)</b>            | AWVWNTHADFADEC*PKPELLAIR          | -  | -  | 17  |
| IPI00322931 | <b>Adult male tongue cDNA, RIKEN full-length enriched library</b>   | ATFHTPFSQLGQSPAC*SSYTFPK          | -  | -  | 40  |
| IPI00323592 | <b>Malate dehydrogenase, mitochondrial precursor</b>                | ETEC*TYFSTPLLLGK                  | -  | -  | 4   |
|             |                                                                     | GC*DVVVIPAGVPR                    | -  | -  | 8   |
|             |                                                                     | GYLGPQLPDC*LK                     | -  | -  | 7   |
|             |                                                                     | IQEAGTE*VVK                       | 11 | -  | -   |
| IPI00323816 | <b>Selenium-binding protein 2</b>                                   | C*GPGYPTPLEAMK                    | -  | 13 | -   |
|             |                                                                     | FLHDPSTATQGFVGC*ALSSNIQR          | -  | -  | 10  |
|             |                                                                     | GGSVQVLEDQELTC*QPEPLVVK           | -  | 12 | 40  |
| IPI00323881 | <b>Importin beta-1 subunit</b>                                      | IQFNLDLQSLLC*ATLQNVLR             | -  | -  | 12  |
| IPI00323971 | <b>Inosine-5'-monophosphate dehydrogenase 2</b>                     | HGFC*GIPITDTR                     | -  | 20 | -   |
| IPI00330754 | <b>D-beta-hydroxybutyrate dehydrogenase, mitochondrial</b>          | METYC*NSGSTDTSSVINAVTHALTAATPYT   | -  | -  | 28  |
|             |                                                                     | TIQLNVC*NSEEEVK                   | -  | -  | 4   |
| IPI00330804 | <b>Heat shock protein HSP 90-alpha</b>                              | VFIMDNC*EELIPEYLNFR               | -  | -  | 5   |
| IPI00331066 | <b>Calbindin</b>                                                    | AFELYDQDNGNGYIDENELDALLKDLK*EK    | -  | -  | 5   |
| IPI00331094 | <b>Aspartoacylase</b>                                               | VIPLGGDC*TVYPVFVNEAAYYEK          | -  | -  | 9   |
| IPI00331322 | <b>Microsomal glutathione S-transferase 1</b>                       | ITNKVFANPEDC*AGFGK                | -  | -  | 17  |
|             |                                                                     | VFANPEDC*AGFGK                    | -  | -  | 51  |
|             |                                                                     | VFANPEDC*AGFGKGENAK               | -  | -  | 18  |
| IPI00331436 | <b>Lap3 protein</b>                                                 | LNLPIINIIGLAPLC*ENMPGSK           | -  | -  | 27  |
|             |                                                                     | SAGAC*TAAAFRL                     | -  | -  | 8   |
| IPI00331490 | <b>Aflatoxin B1 aldehyde reductase member 2</b>                     | GHSELDTAFMYC*DGQSENILGGLGLGLGS    | -  | -  | 22  |
| IPI00331541 | <b>6-phosphofructokinase, muscle type</b>                           | LPLMEC*VQVTK                      | -  | -  | 18  |
|             |                                                                     | SSYLNIIVGLVGSIDNDFC*GTDMTIGTDSALF | -  | -  | 5   |
| IPI00336324 | <b>Malate dehydrogenase, cytoplasmic</b>                            | FVE*GLPINDFSR                     | 12 | -  | -   |
|             |                                                                     | GE*FITTVQQR                       | 4  | -  | -   |
|             |                                                                     | VIVVGNPANTNC*LTASK                | -  | 12 | -   |
| IPI00337893 | <b>Pyruvate dehydrogenase E1 component alpha subunit</b>            | LPCIFIC*ENNR                      | -  | -  | 38  |
|             |                                                                     | NFYGGNGIVGAQVPLGAGIALAC*K         | -  | -  | 98  |
| IPI00350458 | <b>Isoform 1 of UNC45 homolog B</b>                                 | AGVISALAC*MMVK                    | -  | -  | 4   |
| IPI00352124 | <b>Flavin containing monooxygenase 5</b>                            | IAVIGAGASGLTC*IK                  | -  | -  | 12  |
|             |                                                                     | LLLGPC*TPVQYR                     | -  | -  | 16  |

|             |                                                              |                                  |    |     |     |
|-------------|--------------------------------------------------------------|----------------------------------|----|-----|-----|
| IPI00355265 | <b>PREDICTED: similar to High mobility group protein 1</b>   | MSSYAFFVQTC*R                    | -  | -   | 6   |
| IPI00377396 | <b>41 kDa protein</b>                                        | IDATQVEVNPFGGETPEGQVVC*FDAK      | -  | -   | 22  |
|             |                                                              | VEAILVNIFFGIVNC*AIANGITK         | -  | -   | 64  |
| IPI00378120 | <b>Glutaredoxin-related protein 5</b>                        | GTPEQPQC*GFSNAVVQILR             | -  | 7   | -   |
| IPI00380320 | <b>Lactate dehydrogenase D</b>                               | DSGLWFVPVDPGADASLC*GMAATGASGTN.  | -  | -   | 7   |
|             |                                                              | IEFLDDVMMDAC*NR                  | -  | -   | 5   |
|             |                                                              | LHPAPEATVAATC*AFPSVQAAVDSTVQILQ  | -  | -   | 11  |
| IPI00381277 | <b>PREDICTED: similar to zinc finger protein 420 isoform</b> | C*SSLRTHQKIHAGEKPHACEKCGK        | 28 | -   | -   |
| IPI00395140 | <b>L-xylulose reductase</b>                                  | ALTNHTVYC*STK                    | -  | 7   | -   |
| IPI00403579 | <b>hypothetical protein LOC232078</b>                        | GDFSCL*EVLRL                     | -  | -   | 5   |
|             |                                                              | MGLPIC*LVVAVNR                   | -  | -   | 14  |
| IPI00403810 | <b>Tubulin alpha-6 chain</b>                                 | AVC*MLSNTTAAIEAWAR               | -  | -   | 34  |
|             |                                                              | AYHEQLTVAEITNAC*FEPANQMVK        | -  | -   | 15  |
|             |                                                              | LADQC*TLGQGLVLFHSGGGTSGGFTSLLI   | -  | -   | 12  |
|             |                                                              | TIQFVDFWC*PTGFK                  | -  | -   | 11  |
| IPI00404014 | <b>Carnitine transporter 2 variant</b>                       | KARTWASIHLLNTFFAIGAMLVALAS*YLLK  | 6  | -   | -   |
|             |                                                              | KARTWASIHLLNTFFAIGAMLVALASY*LLK  | 9  | -   | -   |
| IPI00406419 | <b>Xaa-Pro dipeptidase</b>                                   | IEEDVVVTDSGMELLTC*VPR            | -  | -   | 7   |
| IPI00406442 | <b>Succinyl-CoA ligase [GDP-forming] subunit alpha, m</b>    | LIGPNC*PGVINPGECK                | -  | -   | 16  |
|             |                                                              | LIGPNC*PGVINPGECK                | -  | -   | 8   |
| IPI00408378 | <b>Isoform 1 of 14-3-3 protein theta</b>                     | DNLTLWTSDSAGEEC*DAEAGAEN         | -  | -   | 23  |
|             |                                                              | YLAEVAC*GDDR                     | -  | -   | 7   |
| IPI00408961 | <b>3-hydroxyanthranilate 3,4-dioxygenase</b>                 | VTMGGQC*IALAPDDSLVLPAGTSYVWER    | -  | -   | 7   |
| IPI00409345 | <b>Lambda-crystallin homolog</b>                             | VILSSSSSC*LLPSK                  | -  | 40  | 27  |
|             |                                                              | VILSSSSSC*LLPSK                  | -  | 40  | -   |
| IPI00420706 | <b>Leucine-rich PPR-motif containing</b>                     | VFESTC*SSGSPGSNQALLLR            | -  | -   | 19  |
| IPI00420718 | <b>Hydroxymethylglutaryl-CoA synthase, mitochondrial</b>     | MGFCQVQEDINSLC*LTVVQR            | -  | -   | 5   |
|             |                                                              | QAGNNQPFLLDDVQYMIFHTPFC*K        | -  | 9   | 20  |
| IPI00420882 | <b>2-oxoglutarate dehydrogenase E1 component, mitoc</b>      | FGLEGC*EVLIPALK                  | -  | -   | 4   |
| IPI00421223 | <b>Tropomyosin alpha-4 chain</b>                             | EENVGLHQTLDDQTLNELNC*I           | -  | -   | 6   |
| IPI00454008 | <b>Serine hydroxymethyl transferase 2</b>                    | GLELIASENFC*SR                   | -  | -   | 4   |
| IPI00454049 | <b>Enoyl-CoA hydratase, mitochondrial precursor</b>          | ALNALC*NGLIEELNQALETFEQDPVAVGAVL | -  | 107 | 303 |
| IPI00458204 | <b>48 kDa protein</b>                                        | LTPPTYGDLNHLVSAATMSGVTTCLR       | -  | -   | 25  |
|             |                                                              | VSDTVVEPYNATLSVHQLVENTDETYC*IDD  | -  | -   | 9   |
|             |                                                              | VSDTVVEPYNATLSVHQLVENTDETYCIDDE  | -  | -   | 8   |
| IPI00459725 | <b>Isoform 1 of Isocitrate dehydrogenase [NAD] subunit</b>   | KTFDLYANVRPC*VSIEGYK             | -  | -   | 16  |
|             |                                                              | TFDLYANVRPC*VSIEGYK              | -  | -   | 23  |
| IPI00461964 | <b>NOD-derived CD11c +ve dendritic cells cDNA, RIKEN</b>     | C*MALSTAILVGEAK                  | 24 | 382 | -   |
|             |                                                              | C*MALSTAILVGEAKK                 | -  | 70  | -   |
|             |                                                              | GYENGNFVGPTIISNVKPSMTC*YK        | -  | -   | 59  |
| IPI00462072 | <b>Alpha-enolase</b>                                         | VNQIGSVTESLQAC*K                 | 5  | -   | -   |
| IPI00463392 | <b>RIKEN cDNA E030049G20 gene</b>                            | EE*PAKITAYQEGLPDEER              | -  | 6   | -   |
| IPI00466069 | <b>Elongation factor 2</b>                                   | STLTDLSVC*K                      | -  | 13  | -   |
|             |                                                              | VTDGALVVVDCVSGVC*VQTETVLR        | -  | -   | 155 |
| IPI00466128 | <b>Alcohol dehydrogenase</b>                                 | GLE*VTAYSPLGSSDR                 | 8  | -   | -   |
| IPI00467066 | <b>Glycine N-methyltransferase</b>                           | LSYYPHC*LASFTELVR                | -  | -   | 29  |
| IPI00467447 | <b>Ras GTPase-activating-like protein IQGAP1</b>             | VNTSSALANISLALEQGC*AVTLLK        | -  | 22  | -   |
| IPI00467833 | <b>Triosephosphate isomerase</b>                             | CLGELIC*TLNAANVPAGTEVVCAPPTAYIDF | -  | -   | 21  |
|             |                                                              | IYGGSVTGATC*K                    | -  | -   | 8   |
|             |                                                              | VSHALAEGLVIAC*IGEK               | -  | -   | 24  |
| IPI00468481 | <b>ATP synthase subunit beta, mitochondrial precursor</b>    | AIAE*LGYPVDPDLDSTSR              | 15 | -   | -   |
|             |                                                              | FTQAGSE*VSALLGR                  | 5  | -   | -   |
|             |                                                              | SLQDIIAIIILGMDLS*EEDK            | 22 | -   | -   |
|             |                                                              | SLQDIIAIIILGMDLSEED*DK           | 5  | -   | -   |
|             |                                                              | SLQDIIAIIILGMDLSEED*K            | 26 | -   | -   |
| IPI00554931 | <b>4-hydroxyphenylpyruvate dioxygenase</b>                   | IVFVLC*SALNPWNK                  | -  | 32  | -   |
| IPI00554933 | <b>Glutathione S-transferase theta-1</b>                     | VKDC*PPADLIK                     | -  | -   | 6   |
|             |                                                              | VLELYDLLSQPC*R                   | -  | -   | 10  |
| IPI00622235 | <b>Transitional endoplasmic reticulum ATPase</b>             | GVLFYGPFGC*GK                    | -  | -   | 33  |
| IPI00625913 | <b>32 kDa protein</b>                                        | PY*CKLLIVSNPVDILTYYAWK           | -  | 8   | -   |
|             |                                                              | PYCK*LLIVSNPVDILTYYAWK           | -  | 8   | -   |
| IPI00653158 | <b>14 days embryo liver cDNA, RIKEN full-length enrich</b>   | LCGSGFQISVSGCQEIC*SK             | -  | -   | 12  |
|             |                                                              | VVGYFVSGC*DPTIMGIGPVPAINGALK     | -  | -   | 54  |
|             |                                                              | VVGYFVSGC*DPTIMGIGPVPAINGALKK    | -  | -   | 77  |
|             |                                                              | YAVGSAC*IGGGQGIALLIIONTA         | -  | 19  | 89  |
| IPI00653247 | <b>13 days embryo liver cDNA, RIKEN full-length enrich</b>   | GSE*SCDCLQGFQLTHSLGGGTGSGMGTLI   | -  | -   | 6   |
|             |                                                              | GSESCD*CLQGFQLTHSLGGGTGSGMGTLI   | -  | -   | 5   |
| IPI00658877 | <b>PREDICTED: similar to F11C1.5a</b>                        | LGHILVDEADKAPTNVTC*ILK           | -  | -   | 17  |
| IPI00663327 | <b>Beta-1-globin (Fragment)</b>                              | GTFASTSELH*CDK                   | -  | -   | 6   |
|             |                                                              | VH*LTDAEKAASVGLWGK               | -  | -   | 17  |
|             |                                                              | YFDSFGDLSASAIMGNAK*VK            | -  | -   | 4   |
| IPI00677618 | <b>10, 11 days embryo whole body cDNA, RIKEN full-len</b>    | LEAPC*QQWMELR                    | -  | 14  | -   |
| IPI00750197 | <b>PREDICTED: similar to 14-3-3 protein theta</b>            | DNLTLWTSDSAAEEDC*AAEAGAEN        | -  | -   | 17  |
| IPI00754489 | <b>Bifunctional 3'-phosphoadenosine 5'-phosphosulfat</b>     | IHESAGLPFFEIFVDAPLNIC*ESR        | -  | -   | 6   |



## Supplementary Information Methods:

All reagents were purchased from Sigma-Aldrich unless otherwise noted. Dry solvents were obtained by passing commercially available pre-dried, oxygen-free formulations through activated alumina columns. NMR spectra were obtained in deuterated chloroform on a Varian Inova-400 instrument. NMR chemical shifts are reported in ppm downfield relative to the internal solvent peak and *J* values are reported in Hz. High resolution mass spectrometry experiments (HRMS) were performed at The Scripps Research Institute Mass Spectrometry Core on an Agilent mass spectrometer using ESI-TOF (electrospray ionization – time of flight).

### Synthesis of undec-10-ynyl benzenesulfonate [sulfonate ester (SE) probe, 1]:

This probe was synthesized using a previously published protocol.<sup>1</sup>

**Synthesis of *N*-(hex-5-ynyl)-4-(oxiran-2-yl)butanamide [linear epoxide (EP) probe, 2]:** To a solution of hex-5-enoic acid (100  $\mu$ L, 0.9 mmol) in acetonitrile (10 mL) was added 1-hydroxybenzotriazole (HOBT) (150 mg, 1.1 mmol, 1.2 equiv) and *N*-Ethyl-*N'*-(3-dimethylaminopropyl)carbodiimide (EDC) (171 mg, 1.1 mmol, 1.2 equiv). This mixture was stirred at room temperature for 2 hours, followed by addition of hex-5-yn-1-amine<sup>2</sup> (175 mg, 1.8 mmol, 2.0 equiv) and diisopropylethylamine (313  $\mu$ L, 1.8 mmol, 2.0 equiv). After stirring at room temperature for 2 hours, the reaction was quenched with water and extracted three times with ethyl acetate. The combined organic phases were washed with saturated sodium chloride and dried over anhydrous magnesium sulfate to provide *N*-(hex-5-ynyl)hex-5-enamide as a white solid, which was carried on to the oxidation reaction without further purification.

*N*-(hex-5-ynyl)hex-5-enamide (50 mg, 0.26 mmol) from above, was dissolved in CH<sub>2</sub>Cl<sub>2</sub> and cooled to 0 °C in an ice bath. A solution of *m*-chloroperoxybenzoic acid (mCPBA, 75% w/w solution in water) (54 mg, 0.32 mmol, 1.2 equiv) was added and the mixture was stirred at 0 °C for 20 min and warmed to room temperature over 1 hour. The reaction was quenched with saturated sodium bicarbonate solution, washed with water and saturated sodium chloride and dried over anhydrous magnesium sulfate. The crude mixture was purified with column chromatography 1:1 ethylacetate:hexanes to provide **3** as a white solid (40 mg, 73% yield). <sup>1</sup>H NMR (400 MHz, CDCl<sub>3</sub>)  $\delta$  1.45 (m, 1H), 1.59 (m, 4H), 1.74 (m, 1H), 1.83 (m, 2H), 1.97 (t, *J* = 2.6 Hz, 1H), 2.24 (m, 4H), 2.48 (dd, *J* = 4.9 Hz, 2.7 Hz, 1H), 2.76 (dd, *J* = 4.9 Hz, 4.0 Hz, 1H), 2.93 (m, 1H), 3.28 (m, 2H). <sup>13</sup>C NMR (100 MHz, CDCl<sub>3</sub>)  $\delta$  18.27, 22.69, 25.88, 28.89, 31.78, 36.26, 39.08, 46.90, 52.36, 68.91, 84.19, 172.68. HRMS *m/z* calcd for C<sub>12</sub>H<sub>19</sub>NO<sub>2</sub> (M+H<sup>+</sup>): 210.1488. Found: 210.1487.

### Synthesis of 2-chloro-*N*-(hex-5-ynyl)acetamide [ $\alpha$ -chloroacetamide (CA) probe, 3]:

To a solution of hex-5-yn-1-amine<sup>2</sup> (200 mg, 2.0 mmol, 1.0 equiv) in CH<sub>2</sub>Cl<sub>2</sub> (5 mL) was added triethylamine (150  $\mu$ L, 2.2 mmol, 1.1 equiv). The solution was cooled to 0 °C in an ice bath with constant stirring. Chloroacetyl chloride (200  $\mu$ L, 2.5 mmol, 1.2 equiv) was added to the cooled solution, which was stirred at 0 °C for 1 hour, then warmed to room temperature and stirred for an additional 2 hours. The reaction was quenched with

10 mL of H<sub>2</sub>O and extracted three times with 10 mL of CH<sub>2</sub>Cl<sub>2</sub>. The CH<sub>2</sub>Cl<sub>2</sub> layers were combined, washed successively with 10% HCl and saturated sodium chloride solutions and dried over anhydrous magnesium sulfate. The CH<sub>2</sub>Cl<sub>2</sub> layer was then concentrated by rotary evaporation and purified by preparatory C18 reverse-phase HPLC using a gradient of 5 – 100% buffer B in buffer A over 25 minutes at a flow rate of 5 mL/minute (Buffer A: 95% H<sub>2</sub>O, 5% acetonitrile, 0.1% trifluoroacetic acid, Buffer B: 5% H<sub>2</sub>O, 95% acetonitrile, 0.1% trifluoroacetic acid), visualizing by UV absorption at 220 nm. The desired product eluted at 27 minutes and was concentrated by rotary evaporation to afford a yellow oil (170 mg, 50% yield). <sup>1</sup>H NMR (400 MHz, CDCl<sub>3</sub>) δ 1.58 (m, 2H), 1.70 (m, 2H), 1.98 (t, *J* = 2.6 Hz, 1H), 2.24 (td, *J* = 6.9 Hz, 2.6 Hz, 2H), 3.35 (m, 2H), 4.06 (s, 2H), 6.64 (br s, 1H). <sup>13</sup>C NMR (100 MHz, CDCl<sub>3</sub>) δ 18.24, 25.75, 28.57, 39.49, 42.86, 69.05, 83.98, 166.02. HRMS *m/z* calcd for C<sub>8</sub>H<sub>12</sub>ClNO (M+Na<sup>+</sup>): 196.0535. Found: 196.0507.

**Synthesis of oct-1-en-7-yn-3-one [ $\alpha,\beta$ -unsaturated ketone (UK) probe, 4]:** This probe was synthesized following the exact procedure outlined in Kusama et al<sup>3</sup> for the synthesis of non-1-en-7-yn-3-one as a colorless oil. <sup>1</sup>H NMR (400 MHz, CDCl<sub>3</sub>) δ 1.79 (m, 2H), 1.91 (t, *J* = 2.5 Hz, 1H), 2.20 (m, 2H), 2.68 (t, *J* = 7.2 Hz, 2H), 5.78 (d, *J* = 10.3 Hz, 1H), 6.18 (d, *J* = 17.6, 1H), 6.30 (dd, *J* = 17.6 Hz, 10.4 Hz, 1H) <sup>13</sup>C NMR (100 MHz, CDCl<sub>3</sub>) δ 17.99, 22.59, 38.09, 53.61, 69.24, 83.78, 128.38, 136.74.

**Synthesis of 4-(pent-4-ynyl)-1-oxaspiro[2.5]octane [spiroepoxide (SP) probe, 5]:** This probe was synthesized following the exact procedure outlined in Gansauer et al<sup>4</sup>, for the synthesis of 4-(but-3-ynyl)-1-oxaspiro[2.5]octane as a colorless oil in a diastereomeric ratio of 63:37. <sup>1</sup>H NMR (400 MHz, CDCl<sub>3</sub>) An asterisk (\*) denotes signals from the minor diastereoisomer. The word ‘both’ indicates overlapping signals for two diastereoisomers. δ 2.70 (d, *J* = 4.8 Hz, 1H)\*, 2.67 (d, *J* = 4.6 Hz, 1H), 2.51 (d, *J* = 4.7 Hz, 1H) both, 2.15-2.20 (m, 3H) both, 1.95 (m, 1H), 1.91 (m, 1H)\*, 1.18-1.73 (m, 12H). <sup>13</sup>C NMR (100 MHz, CDCl<sub>3</sub>) δ 18.82\*, 18.86, 22.47\*, 23.07, 25.19\*, 25.25, 26.71\*, 26.73, 27.83\*, 28.72, 29.60\*, 30.14, 32.10\*, 32.75, 40.25\*, 40.94, 52.00\*, 53.74, 61.43\*, 61.48, 68.49\*, 68.56, 84.55\*, 84.67.

**Preparation of mouse proteomes:** Mouse tissues (heart, liver and kidney) were harvested and immediately flash frozen in liquid nitrogen. The tissues were then Dounce homogenized in 1X Phosphate Buffered Saline (PBS), pH 7.4. Centrifugation at 100,000 x *g* (45 min) provided soluble fractions (supernatant) and membrane fractions (pellet). The mouse liver membrane pellet was resuspended in PBS with sonication. Protein concentrations for each proteome were obtained using the Bio-Rad Dc Protein Assay and stored at -80 °C till use.

**Protein labeling and click chemistry:** Proteome samples were diluted to a 2 mg protein/ml solution in PBS. Each sample (4 x 0.5 mL aliquots) was treated with 50 μM of probe (CA, SE or UK) using 2.5 μL of a 10 mM stock in DMSO. The labeling reactions were incubated at room temperature for 2 hours. Click chemistry was performed by the addition of 100 μM of the TEV-biotin tag (50X stock in DMSO, synthesis reported previously)<sup>5, 6</sup>, 1 mM TCEP (fresh 50X stock in water), 100 μM ligand (17X stock in

DMSO:t-Butanol 1:4) and 1 mM CuSO<sub>4</sub> (50X stock in water). Samples were allowed to react at room temperature for 1 hour. Tubes were combined pairwise and centrifuged (5900 x g, 4 min, 4 °C) to pellet the precipitated proteins. The pellets were resuspended in cold MeOH by sonication and tubes combined pairwise. Centrifugation was followed by a second methanol wash, after which the pellet was solubilized in PBS containing 1.2% SDS via sonication and heating (5 min, 80 °C).

**Streptavidin enrichment of probe-labeled proteins:** The SDS-solubilized, probe-labeled proteome samples were diluted with 5 mL of PBS for a final SDS concentration of 0.2 %. The solutions were then incubated with 100 µL of streptavidin-agarose beads (Pierce) for 3 hours at room temperature. The beads were washed with 10 mL 0.2% SDS/PBS, 3 x 10 mL PBS and 3 x 10 mL H<sub>2</sub>O and the beads were pelleted by centrifugation (1300 x g, 2 min) between washes.

**On-bead trypsin and TEV digestion:** The washed beads from above were suspended in 500 µL of 6 M urea/PBS and 10 mM TCEP (from 20X stock in H<sub>2</sub>O) and placed in a 65 °C heat block for 15 minutes. 20 mM iodoacetamide (from 50X stock in H<sub>2</sub>O) was then added and allowed to react at 37 °C for 30 minutes. Following reduction and alkylation, the beads were pelleted by centrifugation (1300 x g, 2 min) and resuspended in 150 µL of 2 M urea/PBS, 1 mM CaCl<sub>2</sub> (100X stock in H<sub>2</sub>O), and trypsin (2 µg). The digestion was allowed to proceed overnight at 37 °C. The digest was separated from the beads using a Micro Bio-Spin column and the beads were then washed with 3 x 500 µL PBS, 3 x 500 µL H<sub>2</sub>O and 1 x 150 µL of TEV digest buffer. The washed beads were then resuspended in 150 µL of TEV digest buffer with AcTEV Protease (Invitrogen, 5 µL) for 12 hours at 29 °C. The eluted peptides were separated from the beads using a Micro Bio-Spin column and the beads washed with H<sub>2</sub>O (2 x 75 µL). Formic acid (15 µL) was added to the sample, which was stored at -20 °C until mass spectrometry analysis.

**Liquid chromatography-mass spectrometry (LC-MS) analysis:** LC-MS analysis was performed on an LTQ ion trap mass spectrometer (ThermoFisher) coupled to an Agilent 1100 series HPLC. TEV digests were pressure loaded onto a 250 µm fused silica desalting column packed with 4 cm of Aqua C18 reverse phase resin (Phenomenex). The peptides were then eluted onto a biphasic column (100 µm fused silica with a 5 µm tip, packed with 10 cm C18 and 3 cm Partisphere strong cation exchange resin (SCX, Whatman) using a gradient 5-100% Buffer B in Buffer A (Buffer A: 95% water, 5% acetonitrile, 0.1% formic acid; Buffer B: 20% water, 80% acetonitrile, 0.1% formic acid). The peptides were then eluted from the SCX onto the C18 resin and into the mass spectrometer using four salt steps as outlined in Speers et al<sup>6</sup> and Weerapana et al<sup>5</sup>.

The flow rate through the column was set to ~0.25 µL/min and the spray voltage was set to 2.75 kV. One full MS scan (400-1800 MW) was followed by 18 data dependent scans of the n<sup>th</sup> most intense ions with dynamic exclusion disabled.

**MS Data Analysis:** The generated tandem MS data were searched using the SEQUEST algorithm against version 3.23 of the mouse IPI database. A static modification of +57 on Cys was specified to account for iodoacetamide alkylation. For the SE-labeled samples, a

differential modification of +435.3 was specified on Arg, Asp, Glu, His, Lys, Ser, Thr and Tyr, with a modification of +378.3 on Cys. CA-labeled samples were searched with a differential modification of +422.3 on Arg, Asp, Glu, His, Lys, Ser, Thr and Tyr and +365.3 on Cys. UK-labeled samples were searched with a differential modification of +407.3 on Arg, Asp, Glu, His, Lys, Ser, Thr and Tyr and +350.3 on Cys. SEQUEST output files were filtered using DTASelect with default parameters as described in the DTASelect Manual v1.9 [min Xcorr = 1.8 (+1), 2.5 (+2), 3.5 (+3), min DeltaCN = 0.08]. Reported peptides were also required to be fully tryptic and contain the desired probe modification. For each probe, datasets were obtained for 4 different mouse proteomes (soluble heart, kidney, liver and liver membranes) with two independent MS runs, resulting in 8 datasets for each probe. This data was collated into an excel file format and further analysis was performed to screen for peptides that appeared in two or more datasets with two or more spectral counts in each dataset. Peptides that contained two or more missed tryptic cleavage sites within the peptide were removed. These data were then analyzed for peptides with >90% of spectral counts assigned to a single amino acid, which yielded the dataset plotted in **Figure 1b**. The full list of labeled peptides is shown in **Supplementary Information Tables 2, 3, 4 and 5**, which include peptides for which multiple sites of labeling were assigned.

**Solution reactivity studies:** Amino acid derivatives containing C- and N-terminal protecting groups were purchased from Bachem: Ac-Phe-NH<sub>2</sub>, Ac-Asp-OMe, Ac-Lys-NH<sub>2</sub>, Ac-Tyr-NH<sub>2</sub> and Cys and His derivatives Ac-cystamine and Ac-histamine were purchased from Sigma. 1 M stocks of each amino acid was made in DMSO and diluted into PBS, pH 7.4 to yield a 10 mM solution. Ac-Phe-NH<sub>2</sub> (10 mM) was used as an internal standard. The pH of these solutions was adjusted to 7.4 and each of the electrophiles (SE, CA and UK) were added at 500 µM final concentration. The reactions were allowed to proceed at room temperature and analyzed by LC/MS after 1 hour and 12 hours using a gradient of 0 to 100% Buffer B in Buffer A in 45 minutes (Buffer A: 95% H<sub>2</sub>O, 5% acetonitrile, 0.1% formic acid; Buffer B: 5% H<sub>2</sub>O, 95% acetonitrile, 0.1% formic acid).

**Generation of X-Press tagged ALDH-1 constructs and mutants:** The ALDH-1 construct for subcloning into the eukaryotic expression vector pcDNA4 max/His, which results in the expression of N-terminally X-press/His tagged proteins, was generated as previously reported.<sup>7</sup> Point mutations were generated using the Quickchange procedure (Stratagene). All mutant cDNAs were sequenced and found to contain only the desired mutation.

**Recombinant expression of enzymes in eukaryotic cells:** ALDH-1 constructs in pcDNA4 max/His were recombinantly expressed in COS-7 cells by transient transfection. COS-7 cells were grown in 100-mm dishes in complete medium (DMEM with L-glutamine, nonessential amino acids, sodium pyruvate and FBS). The cells were transiently transfected using the FuGENE 6 transfection system (Roche) following the manufacturer's protocol. Cells were washed three times with PBS, collected by scraping, suspended in 400 µL of PBS and lysed by sonication. The soluble and membrane fractions were separated by centrifugation at 64,000 g for 45 minutes. Protein

concentrations for the cytosolic fractions were obtained using the Bio-Rad Dc Protein Assay and stored at -80 °C till use.

**Labeling of ALDH-1 and mutants:** For SE-labeling, rhodamine-tagged SE probe (PS-Rh, synthesized as previously described<sup>8</sup>) was used. Protein samples (50 µL of a 2mg/ml solution) were treated with 10 µM of PS-Rh (500 µM stock in DMSO) and the reactions were incubated for 1 hour at room temperature before quenching with 50 µL of 2X SDS-PAGE loading buffer (reducing). Quenched reactions were separated by SDS-PAGE (30 µL of sample/lane) and visualized in-gel using a Hitachi FMBio Iie flatbed laser-induced fluorescence scanner (MiraiBio, Alameda, CA).

For CA labeling, protein samples (50 µL of a 2mg/ml solution) were treated with 10 µM of the CA probe (500 µM stock in DMSO) and the reactions were incubated for 1 hour at room temperature. Click chemistry was performed with 20 µM rhodamine azide, 1 mM TCEP (fresh 50X stock in water), 100 µM ligand (17X stock in DMSO:t-Butanol 1:4) and 1 mM CuSO<sub>4</sub> (50X stock in water). The reaction was allowed to proceed at room temperature for 1 hour before quenching with 50 µL of 2X SDS-PAGE loading buffer (reducing). Quenched reactions were separated by SDS-PAGE (30 µL of sample/lane) and visualized in-gel using a Hitachi FMBio Iie flatbed laser-induced fluorescence scanner (MiraiBio, Alameda, CA).

**Western blot analysis of ALDH-1 expression:** The SDS-PAGE gels from above were transferred by electroblotting onto nitrocellulose membranes, which were blocked in Tris-buffered saline (TBS) with 1% Tween (TBS-Tween) and 3% (w/v) non-fat dry milk overnight at 4 °C. Blots were then treated with α-X-press antibody (Invitrogen, 1:5000) in TBS-Tween for 1 hour at room temperature. The blot was washed with TBS-Tween three times (10 min/wash), then treated with goat α-mouse IgG horseradish peroxidase conjugate (Bio-Rad, 1:10,000) for 30 min at 25 °C. Blots were washed with TBS-Tween three times (10 min/wash), treated with SuperSignal chemiluminescence reagents (Pierce) and exposed to film for 0.1 minutes before development.

**Generation of Myc/His tagged CLIC constructs and mutants:** cDNAs corresponding to mouse CLIC1, CLIC4 and CLIC5 were purchased as expressed sequence tags (Open Biosystems). The constructs for subcloning into the eukaryotic expression vector pcDNA3 myc/His, which results in the expression of C-terminally myc/His tagged proteins, were generated by polymerase chain reaction (PCR) from the corresponding cDNA using the following primers:

**CLIC1**

Sense primer, 5'-GAAGGATCCATGGCTGAAGAACAACCT-3'

Antisense primer, 5'-CGGCTCGAGTTTGAGAGCCCTGGCCAC-3'

**CLIC4**

Sense primer, 5'-GAAGGATCCATGGCGCTGTCGATGCCC-3'

Antisense primer, 5'- CGGCTCGAGCTTGGTAAGTCTCTTGGC-3'

## CLIC5

Sense primer, 5'-GAAGGATCCATGACGGACTCAGCGACAACT-3'

Antisense primer, 5'-CGGCTCGAGCGATCGGCTGAGGC-3'

The PCR product was digested with *Bam*HI-*Xho*I and subcloned into a *Bam*HI-*Xho*I digested pcDNA3 myc/his-B vector and sequenced. The CLIC4 C35S mutant was generated using the Quickchange procedure (Stratagene). The mutant cDNA was sequenced and found to contain only the desired mutation.

**Recombinant expression of CLIC proteins in eukaryotic cells:** CLIC1, CLIC4, CLIC5 and CLIC4 C35S constructs in pcDNA3 myc/His were recombinantly expressed in COS-7 cells by transient transfection. COS-7 cells were grown in 100-mm dishes in complete medium (DMEM with L-glutamine, nonessential amino acids, sodium pyruvate and FBS). The cells were transiently transfected using the FuGENE 6 transfection system (Roche) following the manufacturer's protocol. Cells were washed three times with PBS, collected by scraping, suspended in 400  $\mu$ L of PBS and lysed by sonication. The soluble and membrane fractions were separated by centrifugation at 64,000 g for 45 minutes. Protein concentrations for the cytosolic fractions were obtained using the Bio-Rad Dc Protein Assay and stored at -80 °C till use.

**In vitro labeling of CLIC proteins:** Protein samples (50  $\mu$ L of a 1 mg/ml solution) were treated with 20  $\mu$ M of the CA probe (1000  $\mu$ M stock in DMSO) and the reactions were incubated for 1 hour at room temperature. Click chemistry was performed with 25  $\mu$ M rhodamine azide, 1 mM TCEP (fresh 50X stock in water), 100  $\mu$ M ligand (17X stock in DMSO:t-Butanol 1:4) and 1 mM CuSO<sub>4</sub> (50X stock in water). The reaction was allowed to proceed at room temperature for 1 hour before quenching with 50  $\mu$ L of 2X SDS-PAGE loading buffer (reducing). Quenched reactions were separated by SDS-PAGE (30  $\mu$ L of sample/lane) and visualized in-gel using a Hitachi FMBio IIe flatbed laser-induced fluorescence scanner (MiraiBio, Alameda, CA).

**In situ labeling of CLIC proteins:** COS-7 cells grown in 100 mm dishes were transfected with CLIC1, CLIC4, CLIC5 and CLIC4 C35S constructs using Fugene as described previously. The media was removed from the cells and replaced with 10 mL of fresh complete medium containing 20  $\mu$ M of the CA probe (20  $\mu$ L of a 10 mM stock in DMSO). The cells were incubated with probe-containing media for 1 hour, washed three times with PBS, collected by scraping, suspended in 400  $\mu$ L of PBS and lysed by sonication. The soluble and membrane fractions were separated by centrifugation at 64,000 g for 45 minutes. Protein concentrations for the cytosolic fractions were obtained using the Bio-Rad Dc Protein Assay and stored at -80 °C till use. Click chemistry was performed as described above.

**Nitric oxide treatment of lysates:** Lysates of COS-7 cells overexpressing CLIC 1, CLIC 4, CLIC 5 and CLIC 4 C35S (50  $\mu$ L of 0.5 mg/ml) were treated with 5 mM diethylamine nitric oxide sodium salt (DEANO, Invitrogen). A 250 mM stock of DEANO was made in 10 mM NaOH and diluted 1:50 into the 50  $\mu$ L reaction. The lysates were treated with

DEANO for 1 hour, followed by addition of 20  $\mu\text{M}$  of the CA probe for 15 minutes. Click chemistry was performed as described above.

**Oxidized glutathione (GSSG) treatment of lysates:** Lysates of COS-7 cells overexpressing CLIC 1, CLIC 4, CLIC 5 and CLIC 4 C35S (50  $\mu\text{L}$  of 0.5 mg/ml) were treated with 2 mM GSSG for 1 hour, followed by addition of 20  $\mu\text{M}$  of CA for 15 minutes. Click chemistry was performed as described above.

**Western blot analysis of CLIC expression:** The SDS-PAGE gels from above were transferred by electroblotting onto nitrocellulose membranes, which were blocked in Tris-buffered saline (TBS) with 1% Tween (TBS-Tween) and 3% (w/v) non-fat dry milk overnight at 4  $^{\circ}\text{C}$ . Blots were then treated with  $\alpha$ -myc antibody (Invitrogen, 1:5000) in TBS-Tween for 1 hour at room temperature. The blot was washed with TBS-Tween three times (10 min/wash), then treated with goat  $\alpha$ -mouse IgG horseradish peroxidase conjugate (Bio-Rad, 1:10,000) for 30 min at 25  $^{\circ}\text{C}$ . Blots were washed with TBS-Tween three times (10 min/wash), treated with SuperSignal chemiluminescence reagents (Pierce) and exposed to film for 0.1 minutes before development.

#### References:

1. Speers, A. E. & Cravatt, B. F. *Chem. Biol.* **11**, 535-46 (2004).
2. Muller, T. E., Lercher, A. A., Nhu, N, V. *AIChE Journal* **49**, 214-224 (2003).
3. Kusama, H., Yamabe, H., Onizawa, Y., Hoshino, T. & Iwasawa, N. *Angew. Chem. Int. Ed. Engl.* **44**, 468-70 (2005).
4. Gansauer, G., Pierobon, M, Bluhm, H. *Synthesis* **16**, 2500-2520 (2001).
5. Weerapana, E., Speers, A. E. & Cravatt, B. F. *Nat. Protoc.* **2**, 1414-25 (2007).
6. Speers, A. E. & Cravatt, B. F. *J. Am. Chem. Soc.* **127**, 10018-9 (2005).
7. Adam, G. C., Burbaum, J., Kozarich, J. W., Patricelli, M. P. & Cravatt, B. F. *J. Am. Chem. Soc.* **126**, 1363-8 (2004).
8. Adam, G. C., Sorensen, E. J. & Cravatt, B. F. *Nat. Biotechnol.* **20**, 805-9 (2002).
